# Supplementary material for: Enantioselective total synthesis and structural reassignment of (+)-alsmaphorazine E via a traceless chirality transfer strategy
Source: Royal Society of Chemistry journal article supplement (doi:10.1039/c6cc00930a), 2016-01-01

## Supporting Information Available

- I) Experimental Section
- II) Abbreviations
- III) References
- IV)  $^1\text{H}$  and  $^{13}\text{C}$  NMR Spectra of Compounds

### I) Experimental Section

#### Experimental Data for Compounds

**General Procedures.** All reactions were carried out under a nitrogen or argon atmosphere with dry solvents under anhydrous conditions, unless otherwise noted. Dry tetrahydrofuran (THF), pentane, diethyl ether ( $\text{Et}_2\text{O}$ ), 1,2-dimethoxyethane (DME), 1,4-dioxane, methylene chloride ( $\text{CH}_2\text{Cl}_2$ ), toluene and triethylamine ( $\text{Et}_3\text{N}$ ) were obtained by passing commercially available pre-dried, oxygen-free formulations through activated alumina columns. Methanol ( $\text{MeOH}$ ), benzene and dimethyl sulfoxide (DMSO) were purchased in anhydrous form and used without further purification. Water, ethyl acetate ( $\text{EtOAc}$ ), diethyl ether ( $\text{Et}_2\text{O}$ ), methylene chloride ( $\text{CH}_2\text{Cl}_2$ ), acetone and hexanes were purchased at the highest commercial quality and used without further purification, unless otherwise stated. Reagents were purchased at the highest commercial quality and used without further purification, unless otherwise stated. Yields refer to chromatographically and spectroscopically ( $^1\text{H}$  NMR) homogeneous materials, unless otherwise stated. Reactions were monitored by thin-

layer chromatography (TLC) carried out on 0.25 mm E. Merck silica gel plates (60F-254) using UV light as visualizing agent and an ethanolic solution of ammonium molybdate, anisaldehyde, and heat as developing agents. E. Merck silica gel (60, particle size 0.040–0.063 mm) was used for flash column chromatography. NMR spectra were recorded on a Bruker AV-400 instrument and calibrated using residual undeuterated solvent as an internal reference. The following abbreviations were used to explain the multiplicities: s = singlet, d = doublet, t = triplet, q = quartet, quint = quintet, m = multiplet, pent = pentet, hex = hexet, br = broad. IR spectra were recorded on a Perkin-Elmer Spectrum One FTIR spectrometer with diamond ATR accessory. Melting points (m.p.) are uncorrected, and recorded on a Buchi B-540 melting point apparatus. High-resolution mass spectra (HRMS) were recorded on an Agilent ESI TOF (time of flight) mass spectrometer at 3500 V emitter voltage.

**Benzyl ester 11:** To a stirred solution of **9**<sup>1</sup> (33.42 g, 100.0 mmol) in DMF (150 mL) at

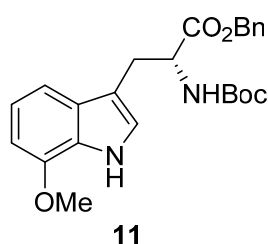

room temperature were added K<sub>2</sub>CO<sub>3</sub> (27.64 g, 200.0 mmol) followed by BnBr (14.25 mL, 120.0 mmol). The resulting mixture was stirred for 0.5 h before it was quenched with H<sub>2</sub>O

(150 mL). The mixture was extracted with Et<sub>2</sub>O (3 × 200 mL). The combined organic layers were dried (Na<sub>2</sub>SO<sub>4</sub>) and concentrated *in vacuo*. Flash column chromatography (silica gel, hexanes:EtOAc 4:1) afforded benzyl ester **11** (38.16 g, 90%) as a yellow amorphous solid. **11**: *R*<sub>f</sub> = 0.32 (hexanes:EtOAc 2:1); [ $\alpha$ ]<sub>D</sub><sup>20</sup> = +3.5 (*c* = 1.0, CHCl<sub>3</sub>); IR (film)  $\nu_{\text{max}}$  3348, 3103, 2969, 2891, 2757, 1741, 1711, 1612, 1573, 1491, 1358, 1246, 1138, 1031, 846, 758, 721 cm<sup>-1</sup>; <sup>1</sup>H NMR (400 MHz, CDCl<sub>3</sub>):  $\delta$  = 8.27 (d, *J* = 20.7 Hz,

1 H), 7.31–7.23 (m, 3 H), 7.21–7.14 (m, 2 H), 7.10 (dd,  $J = 8.0, 2.6$  Hz, 1 H), 7.00–6.93 (m, 1 H), 6.70 (s, 1 H), 6.57 (d,  $J = 7.7$  Hz, 1 H), 5.03 (q,  $J = 12.1$  Hz, 3 H), 4.65 (s, 1 H), 3.87 (s, 3 H), 3.27–3.13 (m, 2 H), 1.37 ppm (s, 9 H);  $^{13}\text{C}$  NMR (100 MHz,  $\text{CDCl}_3$ ):  $\delta = 172.2, 155.3, 146.2, 135.4, 129.1, 128.5$  (2C), 128.4 (2C), 128.3, 126.7, 122.5, 120.1, 111.6, 110.3, 101.9, 79.8, 67.1, 55.3, 54.4, 28.3 (3C), 28.1 ppm; HRMS (ESI): calcd for  $\text{C}_{24}\text{H}_{29}\text{N}_2\text{O}_5^+$  [ $\text{M} + \text{H}^+$ ] 425.2071, found 425.2074.

**Indoline 12:** To a stirred solution of benzyl ester **11** (21.20 g, 50.0 mmol) in AcOH

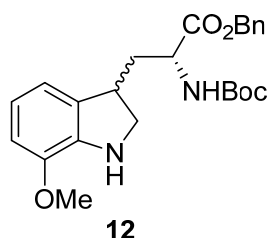

(100 mL) at 0 °C was added  $\text{NaBH}_3\text{CN}$  (6.20 g, 100.0 mmol).

The resulting mixture was stirred at room temperature for 24 h

before it was concentrated *in vacuo* and quenched with  $\text{NaHCO}_3$

(100 mL, sat. aq.). The aqueous layer was extracted with EtOAc ( $3 \times 100$  mL). The combined organic layers were dried ( $\text{Na}_2\text{SO}_4$ ) and concentrated *in vacuo*. Flash column chromatography (silica gel,  $\text{CH}_2\text{Cl}_2$ :EtOAc 20:1) afforded indoline **12** (17.89 g, 84%, ca. 1.2:1 mixture of diastereomers by  $^1\text{H}$  NMR) as a colorless oil.

**12a:**  $R_f = 0.25$  (hexanes:EtOAc 3:1);  $[\alpha]_{\text{D}}^{20} = -31.8$  ( $c = 0.5$ ,  $\text{CHCl}_3$ ); IR (film)  $\nu_{\text{max}}$  3326, 3084, 2971, 2856, 2713, 1739, 1713, 1610, 1582, 1501, 1366, 1238, 1140, 1027, 851, 760, 723  $\text{cm}^{-1}$ ;  $^1\text{H}$  NMR (400 MHz,  $\text{CDCl}_3$ ):  $\delta = 7.34$  (s, 5 H), 6.74–6.63 (m, 3 H), 5.22–5.06 (m, 3 H), 4.45 (td,  $J = 9.2, 4.5$  Hz, 1 H), 3.81 (s, 3 H), 3.77 (d,  $J = 8.5$  Hz, 1 H), 3.45–3.36 (m, 1 H), 3.36–3.26 (m, 1 H), 2.07 (td,  $J = 10.4, 9.7, 4.3$  Hz, 2 H), 1.45 ppm (s, 9 H);  $^{13}\text{C}$  NMR (100 MHz,  $\text{CDCl}_3$ ):  $\delta = 172.7, 155.5, 145.5, 140.2, 135.2, 132.7, 128.6$  (3C), 128.4, 128.3, 119.3, 116.1, 109.7, 80.1, 67.2, 55.3, 53.5, 52.2, 39.4, 37.4, 28.3 ppm (3C); HRMS (ESI): calcd for  $\text{C}_{24}\text{H}_{31}\text{N}_2\text{O}_5^+$  [ $\text{M} + \text{H}^+$ ] 427.2227, found

427.2225.

**12b:**  $R_f$  = 0.20 (hexanes:EtOAc 3:1);  $[\alpha]_D^{20}$  = +28.1 ( $c$  = 0.4, CHCl<sub>3</sub>); IR (film)  $\nu_{\max}$  3332, 3092, 2969, 2857, 2721, 1735, 1721, 1611, 1583, 1505, 1370, 1240, 1142, 1030, 853, 764, 726 cm<sup>-1</sup>; <sup>1</sup>H NMR (400 MHz, CDCl<sub>3</sub>):  $\delta$  = 7.34 (s, 5 H), 6.82–6.64 (m, 3 H), 5.16 (d,  $J$  = 2.8 Hz, 3 H), 4.54–4.41 (m, 1 H), 3.81 (s, 3 H), 3.71 (t,  $J$  = 8.7 Hz, 1 H), 3.44–3.34 (m, 1 H), 3.23 (dd,  $J$  = 8.8, 7.0 Hz, 1 H), 2.37–2.25 (m, 1 H), 1.87 (m,  $J$  = 14.0, 8.2 Hz, 1 H), 1.45 ppm (s, 9 H); <sup>13</sup>C NMR (100 MHz, CDCl<sub>3</sub>):  $\delta$  = 172.6, 155.2, 145.5, 140.1, 135.2, 132.6, 128.6 (3C), 128.4, 128.3, 119.4, 116.5, 109.7, 80.1, 67.1, 55.3, 53.9, 52.5, 39.6, 37.3, 28.3 ppm (3C); HRMS (ESI): calcd for C<sub>24</sub>H<sub>31</sub>N<sub>2</sub>O<sub>5</sub><sup>+</sup> [M + H<sup>+</sup>] 427.2227, found 427.2232.

**Indoline ester 8:** To a stirred solution of indoline **12** (4.05 g, 9.5 mmol) in CH<sub>2</sub>Cl<sub>2</sub> (15

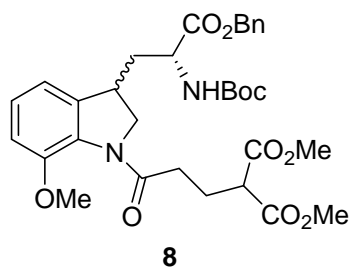

mL) at room temperature were added Et<sub>3</sub>N (2.65 mL, 19.0 mmol) followed by a solution of acyl chloride **10**<sup>2</sup> (4.20 g, 19.0 mmol) in CH<sub>2</sub>Cl<sub>2</sub> (10 mL). The resulting mixture was stirred for 1 h before it was quenched with NH<sub>4</sub>Cl (20 mL,

sat. aq.). The layers were separated, and the aqueous layer was extracted with CH<sub>2</sub>Cl<sub>2</sub> (3 × 20 mL). The combined organic layers were washed with brine (30 mL), dried (Na<sub>2</sub>SO<sub>4</sub>) and concentrated *in vacuo*. Flash column chromatography (silica gel, hexanes:EtOAc 3:1) afforded indoline ester **8** (5.12 g, 88%, ca. 1.2:1 mixture of diastereomers by <sup>1</sup>H NMR) as a colorless oil.

**8a:**  $R_f$  = 0.25 (hexanes:EtOAc 2:1);  $[\alpha]_D^{20}$  = −31.3 ( $c$  = 0.7, CHCl<sub>3</sub>); IR (film)  $\nu_{\max}$  3357, 3105, 2967, 2867, 2769, 1741, 1703, 1651, 1523, 1483, 1358, 1246, 1158, 1031, 864,

756, 712  $\text{cm}^{-1}$ ;  $^1\text{H}$  NMR (400 MHz,  $\text{CDCl}_3$ ):  $\delta$  = 7.33 (s, 5 H), 7.05 (t,  $J$  = 7.8 Hz, 1 H), 6.80 (dd,  $J$  = 7.7, 3.9 Hz, 2 H), 5.15 (dd,  $J$  = 19.5, 7.2 Hz, 3 H), 4.48–4.28 (m, 2 H), 3.84 (s, 4 H), 3.71–3.60 (m, 6 H), 3.52 (t,  $J$  = 7.5 Hz, 1 H), 3.20 (s, 1 H), 2.54 (t,  $J$  = 7.1 Hz, 2 H), 2.33–2.20 (m, 2 H), 2.07–1.88 (m, 2 H), 1.43 ppm (s, 9 H);  $^{13}\text{C}$  NMR (100 MHz,  $\text{CDCl}_3$ ):  $\delta$  = 172.2, 169.7, 169.6 (2C), 155.3, 149.1, 139.9, 135.1, 130.6, 128.6 (3C), 128.5, 128.3, 126.2, 116.5, 111.7, 80.2, 67.3, 56.9, 55.6, 52.3, 52.3, 52.2, 50.7, 38.1, 36.4, 31.8, 28.2 (3C), 24.6 ppm; HRMS (ESI): calcd for  $\text{C}_{32}\text{H}_{41}\text{N}_2\text{O}_{10}^+$  [ $\text{M} + \text{H}^+$ ] 613.2756, found 613.2750.

**8b**:  $R_f$  = 0.22 (hexanes:EtOAc 2:1);  $[\alpha]_D^{20}$  = +7.2 ( $c$  = 0.7,  $\text{CHCl}_3$ ); IR (film)  $\nu_{\text{max}}$  3358, 3075, 2981, 2847, 2769, 1729, 1701, 1656, 1519, 1479, 1362, 1258, 1164, 1045, 866  $\text{cm}^{-1}$ ;  $^1\text{H}$  NMR (400 MHz,  $\text{CDCl}_3$ ):  $\delta$  = 7.33 (s, 5 H), 7.08 (t,  $J$  = 7.9 Hz, 1 H), 6.92 (d,  $J$  = 6.8 Hz, 1 H), 6.82 (d,  $J$  = 8.3 Hz, 1 H), 5.22–5.11 (m, 3 H), 4.53–4.43 (m, 1 H), 4.25 (dd,  $J$  = 11.1, 7.7 Hz, 1 H), 3.92 (dd,  $J$  = 11.3, 5.3 Hz, 1 H), 3.84 (s, 3 H), 3.66 (s, 3 H), 3.63 (s, 3 H), 3.51 (t,  $J$  = 7.5 Hz, 1 H), 3.25–3.16 (m, 1 H), 2.63–2.43 (m, 2 H), 2.32–2.16 (m, 3 H), 1.78 (dt,  $J$  = 14.1, 8.3 Hz, 1 H), 1.45 (s, 9 H);  $^{13}\text{C}$  NMR (100 MHz,  $\text{CDCl}_3$ ):  $\delta$  = 172.3, 169.7, 169.6 (2C), 155.3, 148.9, 140.1, 135.1, 130.4, 128.6 (3C), 128.5, 128.4, 126.3, 117.1, 111.7, 80.2, 67.3, 57.1, 55.6, 52.5, 52.4, 52.3, 50.7, 38.1, 36.4, 31.7, 28.3 (3C), 24.6 ppm; HRMS (ESI): calcd for  $\text{C}_{32}\text{H}_{41}\text{N}_2\text{O}_{10}^+$  [ $\text{M} + \text{H}^+$ ] 613.2756, found 613.2762.

**$\delta$ -Lactamindole 7**: To a solution of indoline ester **8** (6.12 g, 10.0 mmol) in AcOH (100 mL) were added CAN (550 mg, 1.0 mmol) and NaOAc (1.64 g, 20.0 mmol). The reaction vessel was exposed to air through a  $\text{CaCl}_2$  tube. The resulting mixture was

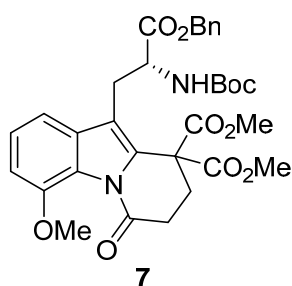

stirred at 110 °C for 12 h before it was cooled down to room temperature and concentrated *in vacuo*. The residue was diluted with H<sub>2</sub>O (100 mL), neutralized with NaHCO<sub>3</sub> (200 mL, sat. aq.) and extracted with EtOAc (3 × 200 mL). The combined organic layers were washed with brine (400 mL), dried (Na<sub>2</sub>SO<sub>4</sub>) and concentrated *in vacuo*. Flash column chromatography (silica gel, hexanes:EtOAc 1:1) afforded  $\delta$ -lactamindole **7** (5.05g, 83%) as a white amorphous solid. **7**:  $R_f$  = 0.35 (hexanes:EtOAc 1:1);  $[\alpha]_D^{20}$  = -8.6 ( $c$  = 0.7, CHCl<sub>3</sub>); IR (film)  $\nu_{\max}$  3413, 3095, 2967, 1744, 1709, 1513, 1458, 1362, 1246, 1172, 1047, 1010, 918, 761, 721 cm<sup>-1</sup>; <sup>1</sup>H NMR (400 MHz, CDCl<sub>3</sub>):  $\delta$  = 7.37–7.20 (m, 7 H), 6.95–6.90 (m, 1 H), 5.51 (d,  $J$  = 6.8 Hz, 1 H), 5.13 (s, 2 H), 4.75 (dd,  $J$  = 11.2, 5.4 Hz, 1 H), 3.97 (s, 3 H), 3.80 (s, 3 H), 3.73 (s, 3 H), 3.09 (dd,  $J$  = 14.9, 5.6 Hz, 1 H), 2.97–2.82 (m, 3 H), 2.79–2.63 (m, 2 H), 1.34 ppm (s, 9 H); <sup>13</sup>C NMR (100 MHz, CDCl<sub>3</sub>):  $\delta$  = 172.4, 169.4, 169.2, 165.1, 155.3, 149.1, 135.5, 133.3, 131.8, 128.4 (2C), 128.2, 128.1 (2C), 125.6, 124.3, 117.2, 112.1, 109.3, 79.7, 67.1, 56.5, 55.9, 53.9, 53.6, 52.9, 31.1, 29.4, 28.2 (3C), 27.1 ppm; HRMS (ESI): calcd for C<sub>32</sub>H<sub>37</sub>N<sub>2</sub>O<sub>10</sub><sup>+</sup> [M + H<sup>+</sup>] 609.2443, found 609.2450.

**Monoester 13**: To a stirred solution of  $\delta$ -lactamindole **7** (1.82 g, 3.0 mmol) in DMSO

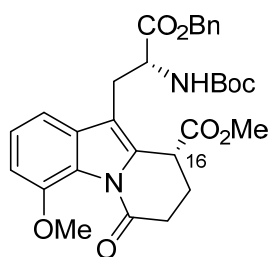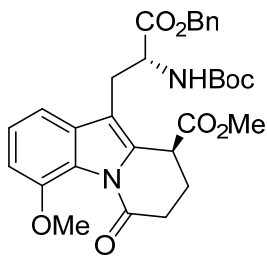

(20 mL) were added LiCl (1.26 g, 30 mmol) and H<sub>2</sub>O (0.54 mL, 30.0 mmol). The resulting mixture was stirred at 65 °C for 8 h before it was quenched with ice water (40 mL, sat. aq.) and extracted with Et<sub>2</sub>O (3 × 50 mL). The combined organic

layers were dried (Na<sub>2</sub>SO<sub>4</sub>) and concentrated *in vacuo*. Flash column chromatography (silica gel, CH<sub>2</sub>Cl<sub>2</sub>:Et<sub>2</sub>O 20:1) afforded monoesters **13a** and **13b** (1.35 g, 82% ca. 1:1 mixture of diastereomers by <sup>1</sup>H NMR) as a colorless oil.

**13a**: *R*<sub>f</sub> = 0.20 (CH<sub>2</sub>Cl<sub>2</sub>:Et<sub>2</sub>O 20:1); [ $\alpha$ ]<sub>D</sub><sup>20</sup> = -21.8 (*c* = 2.0, CHCl<sub>3</sub>); IR (film)  $\nu_{\text{max}}$  3412, 3358, 3096, 2976, 1705, 1523, 1462, 1298, 1230, 1168, 1048, 986, 753, 714 cm<sup>-1</sup>; <sup>1</sup>H NMR (400 MHz, CDCl<sub>3</sub>):  $\delta$  = 7.30 (s, 3 H), 7.22 (d, *J* = 7.8 Hz, 1 H), 7.20–7.06 (m, 3 H), 6.89 (d, *J* = 8.0 Hz, 1 H), 5.09 (dd, *J* = 21.1, 8.5 Hz, 2 H), 4.97 (d, *J* = 12.1 Hz, 1 H), 4.68–4.56 (m, 1 H), 4.11 (s, 1 H), 3.97 (s, 3 H), 3.67 (s, 3 H), 3.29–3.11 (m, 2 H), 3.07–2.92 (m, 1 H), 2.76 (d, *J* = 17.0 Hz, 1 H), 2.44 (d, *J* = 12.6 Hz, 1 H), 2.13 (s, 1 H), 1.40 ppm (s, 9 H); <sup>13</sup>C NMR (100 MHz, CDCl<sub>3</sub>):  $\delta$  = 171.8, 171.3, 166.4, 155.1, 149.1, 134.9, 134.2, 133.3, 128.5 (3C), 128.4, 128.1, 125.2, 124.5, 114.4, 111.7, 109.1, 80.1, 67.3, 56.7, 53.6, 52.6, 37.9, 31.7, 28.2 (3C), 27.3, 24.5 ppm; HRMS (ESI): calcd for C<sub>30</sub>H<sub>35</sub>N<sub>2</sub>O<sub>8</sub><sup>+</sup> [*M* + *H*<sup>+</sup>] 551.2388, found 551.2384.

**13b**: *R*<sub>f</sub> = 0.20 (CH<sub>2</sub>Cl<sub>2</sub>:Et<sub>2</sub>O 20:1); [ $\alpha$ ]<sub>D</sub><sup>20</sup> = +6.0 (*c* = 1.2, CHCl<sub>3</sub>); IR (film)  $\nu_{\text{max}}$  3400, 3365, 3090, 2976, 1701, 1515, 1456, 1370, 1250, 1168, 1071, 978, 748, 710 cm<sup>-1</sup>; <sup>1</sup>H NMR (400 MHz, CDCl<sub>3</sub>):  $\delta$  = 7.34–7.27 (m, 3 H), 7.24 (d, *J* = 7.9 Hz, 1 H), 7.13 (dd, *J* = 10.1, 5.8 Hz, 3 H), 6.90 (d, *J* = 7.9 Hz, 1 H), 5.23 (d, *J* = 7.1 Hz, 1 H), 5.05 (d, *J* = 3.2 Hz, 2 H), 4.72 (d, *J* = 7.1 Hz, 1 H), 4.09 (s, 1 H), 3.98 (s, 3 H), 3.68 (s, 3 H), 3.24–2.93 (m, 3 H), 2.82–2.70 (m, 1 H), 2.45 (ddt, *J* = 13.5, 5.3, 2.6 Hz, 1 H), 2.13–1.98 (m, 1 H), 1.38 ppm (s, 9 H); <sup>13</sup>C NMR (100 MHz, CDCl<sub>3</sub>):  $\delta$  = 172.1, 171.3, 166.3, 155.1, 149.2, 135.1, 134.1, 132.9, 128.5 (3C), 128.3, 127.9, 125.3, 124.5, 114.1, 111.4, 109.1, 80.1, 67.1, 56.7, 53.1, 52.7, 37.8, 31.7, 28.2(3C), 27.6, 24.1 ppm; HRMS (ESI): calcd

for  $C_{30}H_{35}N_2O_8^+$   $[M + H]^+$  551.2388, found 551.2392.

**Pyrroloindole 6'**: To a stirred solution of monoesters **13a** and **13b** (5.50 g, 10.0 mmol)

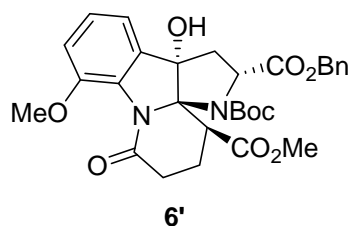

in acetone (100 mL) at 0 °C was added NaHCO<sub>3</sub> (100 mL, sat. aq.). The resulting mixture was stirred for 0.5 h before

it was added oxone (12.28 g, 20.0 mmol). The reaction

mixture was stirred at 0 °C for an additional 2 h before it was diluted with H<sub>2</sub>O (100 mL). The aqueous layer was extracted with CH<sub>2</sub>Cl<sub>2</sub> (3 × 200 mL). The combined

organic layers were washed with brine (300 mL), dried (Na<sub>2</sub>SO<sub>4</sub>) and concentrated *in vacuo*. Flash column chromatography (silica gel, hexanes:EtOAc 1:3) afforded

pyrroloindole **6'** (3.86 g, 68%) as a white amorphous solid. **6'**:  $R_f$  = 0.23

(hexanes:EtOAc 3:1);  $[\alpha]_D^{20}$  = +8.0 ( $c$  = 1.0, MeOH); IR (film)  $\nu_{max}$  3412, 3368, 2984,

2924, 2877, 1701, 1680, 1634, 1596, 1370, 1243, 1160, 1041, 912, 758, 724 cm<sup>-1</sup>; <sup>1</sup>H

NMR (400 MHz, CDCl<sub>3</sub>):  $\delta$  = 7.32 (q,  $J$  = 7.2 Hz, 5 H), 7.19 (t,  $J$  = 7.8 Hz, 1 H), 7.04

(d,  $J$  = 7.4 Hz, 1 H), 6.94 (d,  $J$  = 6.6 Hz, 1 H), 5.16 (d,  $J$  = 12.0 Hz, 1 H), 5.02 (d,  $J$  =

12.3 Hz, 1 H), 4.24 (s, 1 H), 3.76 (s, 6 H), 3.61 (s, 1 H), 3.37 (dd,  $J$  = 13.8, 3.4 Hz, 1

H), 3.23 (s, 1 H), 2.97 (s, 1 H), 2.69 (dd,  $J$  = 12.4, 7.4 Hz, 1 H), 2.59–2.31 (m, 2 H),

2.10–1.87 (m, 1 H), 1.33 ppm (s, 9 H); <sup>13</sup>C NMR (100 MHz, CDCl<sub>3</sub>):  $\delta$  = 171.1, 167.9,

161.4, 158.7, 151.5, 135.5, 135.2, 135.1, 129.9, 128.5 (3C), 128.4, 128.2, 127.6, 115.7,

88.3, 86.9, 82.1, 66.7, 58.2, 53.1, 45.7, 30.9, 29.7, 29.3, 27.9 (3C), 20.1 ppm; HRMS

(ESI): calcd for  $C_{30}H_{35}N_2O_9^+$   $[M + H]^+$  567.2337, found 567.2335.

**Silyl ether 15**: To a stirred solution of pyrroloindole **6'** (1.13 g, 2.0 mmol) in CH<sub>2</sub>Cl<sub>2</sub>



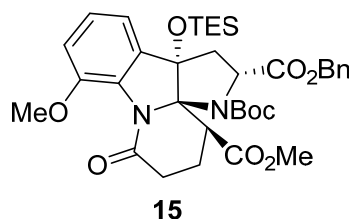

(20 mL) at room temperature were added DMAP (2.44g, 20.0 mmol) and TESOTf (1.35 mL, 6.0 mmol). The resulting mixture was stirred for 1 h before it was quenched with NaHCO<sub>3</sub> (35 mL, sat. aq.). The layers were separated, and the aqueous layer was extracted with CH<sub>2</sub>Cl<sub>2</sub> (3 × 20 mL). The combined organic layers were washed with brine (40 mL), dried (Na<sub>2</sub>SO<sub>4</sub>) and concentrated *in vacuo*. Flash column chromatography (silica gel, hexanes:EtOAc 3:1) afforded silyl ether **15** (1.16 g, 85%) as a colorless oil. **15**: *R*<sub>f</sub> = 0.40 (hexanes:EtOAc 3:1); [ $\alpha$ ]<sub>D</sub><sup>20</sup> = −12.0 (*c* = 0.5, CHCl<sub>3</sub>); IR (film)  $\nu_{\text{max}}$  3551, 3434, 2957, 2861, 2334, 1746, 1671, 1483, 1236, 1138, 1021, 760, 723 cm<sup>−1</sup>; <sup>1</sup>H NMR (400 MHz, CDCl<sub>3</sub>):  $\delta$  = 7.31 (s, 5 H), 7.17 (t, *J* = 7.9 Hz, 1 H), 6.95 (dd, *J* = 26.9, 7.5 Hz, 2 H), 5.24–4.99 (m, 2 H), 3.88–3.65 (m, 6 H), 3.64–3.36 (m, 2 H), 3.22–2.75 (m, 2 H), 2.69–2.54 (m, 2 H), 2.34 (ddd, *J* = 18.6, 11.8, 6.9 Hz, 1 H), 2.04–1.91 (m, 1 H), 1.46 (s, 6 H), 1.17 (s, 3 H), 0.82 (t, *J* = 7.9 Hz, 9 H), 0.56–0.40 ppm (m, 6 H); <sup>13</sup>C NMR (100 MHz, CDCl<sub>3</sub>):  $\delta$  = 170.7, 170.2, 168.1, 153.7, 152.3, 136.2, 135.8, 130.3, 128.4, 128.1, 127.3, 126.9, 116.8, 115.7, 115.2, 114.1, 89.4, 86.6, 82.1, 66.6, 58.7, 55.7, 52.2, 44.3, 34.8, 30.7, 28.1 (3C), 21.4, 6.7 (3C), 6.1 ppm (3C); HRMS (ESI): calcd for C<sub>36</sub>H<sub>49</sub>N<sub>2</sub>O<sub>9</sub>Si<sup>+</sup> [*M* + H<sup>+</sup>] 681.3202, found 681.3208.

**Acid 16:** To a stirred solution of silyl ether **15** (0.68 g, 1.0 mmol) in CH<sub>2</sub>Cl<sub>2</sub> (20 mL)

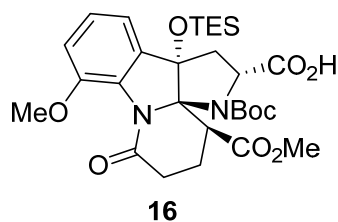

was added Pd/C (10 % wt/wt, 0.07 g) and bubbled with H<sub>2</sub> over 3 h before it was filtered through a short pad of celite. The filtrate was concentrated *in vacuo*. Flash column chromatography (silica gel, CH<sub>2</sub>Cl<sub>2</sub>:MeOH 20:1) afforded acid **16** (0.51 g, 86%) as a

colorless oil. **16**:  $R_f = 0.50$  ( $\text{CH}_2\text{Cl}_2$ :MeOH 20:1);  $[\alpha]_D^{20} = +42.7$  ( $c = 0.8$ ,  $\text{CHCl}_3$ ); IR (film)  $\nu_{\text{max}}$  3584, 3431, 2974, 2852, 2371, 1746, 1710, 1681, 1463, 1326, 1249, 1123, 1034, 923, 749, 721  $\text{cm}^{-1}$ ;  $^1\text{H}$  NMR (400 MHz,  $\text{CDCl}_3$ ):  $\delta = 7.20$  (t,  $J = 7.8$  Hz, 1 H), 7.04–6.95 (m, 2 H), 3.79 (d,  $J = 6.1$  Hz, 6 H), 3.53 (s, 1 H), 3.35 (s, 1 H), 2.92 (s, 2 H), 2.71 (dd,  $J = 12.3, 6.5$  Hz, 1 H), 2.58–2.14 (m, 2 H), 2.02 (s, 1 H), 1.34 (s, 9 H), 0.81 (t,  $J = 7.9$  Hz, 9 H), 0.45 ppm (q,  $J = 7.9$  Hz, 6 H);  $^{13}\text{C}$  NMR (100 MHz,  $\text{CDCl}_3$ ):  $\delta = 172.9, 171.8, 167.6, 152.0$  (2C), 130.6, 127.2 (3C), 115.8, 89.7, 86.4, 83.0, 60.9, 56.5, 54.6, 52.9, 44.1, 31.3, 27.7 (3C), 22.8, 6.6 (3C), 6.00 ppm (3C); HRMS (ESI): calcd for  $\text{C}_{29}\text{H}_{43}\text{N}_2\text{O}_9\text{Si}^+ [\text{M} + \text{H}^+]$  591.2732., found 591.2734.

**Acetate 17**: To a stirred solution of acid **16** (0.59 g, 1.0 mmol) in  $\text{CH}_2\text{Cl}_2$  (10 mL) at

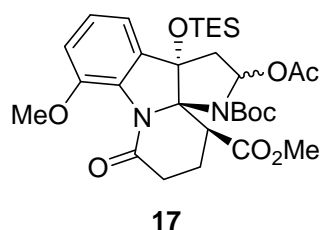

room temperature were added iodine (0.16 g, 0.5 mmol) followed by  $\text{PhI}(\text{OAc})_2$  (0.62 g, 2.0 mmol). The resulting mixture was stirred for 3 h before it was quenched with

$\text{NaHCO}_3$  (20 mL, sat. aq.). The layers were separated, and the aqueous layer was extracted with  $\text{CH}_2\text{Cl}_2$  ( $3 \times 10$  mL). The combined organic layers were washed with brine (20 mL), dried ( $\text{Na}_2\text{SO}_4$ ) and concentrated *in vacuo*. Flash column chromatography (silica gel, hexanes:EtOAc 3:1) afforded acetate **17** (0.50 g, 83%) as a colorless oil. **17**:  $R_f = 0.42$  (hexanes:EtOAc 3:1);  $[\alpha]_D^{20} = +36.0$  ( $c = 1.0$ ,  $\text{CHCl}_3$ ); IR (film)  $\nu_{\text{max}}$  3572, 3428, 2965, 2849, 2342, 1736, 1669, 1453, 1232, 1140, 1051, 756, 719  $\text{cm}^{-1}$ ;  $^1\text{H}$  NMR (400 MHz,  $\text{CDCl}_3$ ):  $\delta = 7.18$ –7.10 (m, 1 H), 7.00 (d,  $J = 7.9$  Hz, 1 H), 6.95 (d,  $J = 7.5$  Hz, 1 H), 6.08 (d,  $J = 5.3$  Hz, 1 H), 3.82 (s, 3 H), 3.73 (s, 3 H), 3.50–3.40 (m, 1 H), 3.01 (s, 2 H), 2.55–2.37 (m, 3 H), 2.05–1.93 (m, 1 H), 1.57 (s, 3

H), 1.36 (s, 9 H), 0.81 (t,  $J = 7.9$  Hz, 9 H), 0.46 ppm (q,  $J = 7.9$  Hz, 6 H);  $^{13}\text{C}$  NMR (100 MHz,  $\text{CDCl}_3$ ):  $\delta = 171.9, 169.7, 168.3, 167.6, 152.5, 152.1, 136.7, 131.1, 126.1, 117.2, 114.2, 89.7, 85.8, 81.6, 57.1, 52.1, 43.2, 30.9, 29.7, 28.1$  (3C), 23.1, 20.6, 6.6 (3C), 6.1 ppm (3C); HRMS (ESI): calcd for  $\text{C}_{30}\text{H}_{45}\text{N}_2\text{O}_9\text{Si}^+$  [ $\text{M} + \text{H}^+$ ] 605.2889, found 605.2885.

**Pyrroloindole 18:** To a stirred solution of acid **16** (1.18 g, 2.0 mmol) in  $\text{CH}_2\text{Cl}_2$  (20

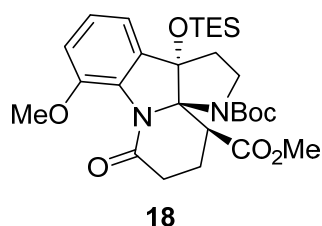

mL) at room temperature were added iodine (0.32 g, 1.0 mmol) followed by  $\text{PhI}(\text{OAc})_2$  (1.23 g, 4.0 mmol). The resulting mixture was stirred for 3 h before it was added

$\text{NaBH}_3\text{CN}$  (1.24 g, 20.0 mmol). The resulting mixture was stirred for further 1 h before it was quenched with  $\text{NaHCO}_3$  (20 mL, sat. aq.). The layers were separated, and the aqueous layer was extracted with  $\text{CH}_2\text{Cl}_2$  ( $3 \times 30$  mL). The combined organic layers were dried ( $\text{Na}_2\text{SO}_4$ ) and concentrated *in vacuo*. Flash column chromatography (silica gel, hexanes:EtOAc 3:1) afforded pyrroloindole **18** (0.95 g, 76%) as a yellow oil. **18**:

$R_f = 0.44$  (hexanes:EtOAc 3:1);  $[\alpha]_D^{20} = +49.0$  ( $c = 1.0$ ,  $\text{CHCl}_3$ ); IR (film)  $\nu_{\text{max}}$  3581, 3432, 2988, 2835, 2359, 1741, 1681, 1468, 1229, 1126, 1053, 764, 726  $\text{cm}^{-1}$ ;  $^1\text{H}$  NMR (400 MHz,  $\text{CDCl}_3$ ):  $\delta = 7.15$  (t,  $J = 7.9$  Hz, 1 H), 6.95 (dd,  $J = 14.9, 7.9$  Hz, 2 H), 3.86 (s, 2 H), 3.73 (s, 3 H), 3.49–3.36 (m, 1 H), 3.21 (t,  $J = 10.1$  Hz, 2 H), 2.99–2.65 (m, 3 H), 2.34 (dq,  $J = 43.1, 11.3$  Hz, 3 H), 2.02–1.90 (m, 1 H), 1.38 (d,  $J = 48.1$  Hz, 9 H), 0.82 (t,  $J = 7.9$  Hz, 9 H), 0.47 ppm (d,  $J = 7.9$  Hz, 6 H);  $^{13}\text{C}$  NMR (100 MHz,  $\text{CDCl}_3$ ):  $\delta = 171.9, 167.8, 153.7, 152.2, 136.5, 130.7, 126.8, 115.4, 114.4, 88.4, 87.2, 81.0, 55.9, 52.1, 44.9, 43.3, 30.9, 30.3, 28.1$  (3C), 22.4, 6.7 (3C), 6.1 ppm (3C); HRMS (ESI):

calcd for  $C_{28}H_{43}N_2O_7Si^+$   $[M + H^+]$  547.2834, found 547.2836.

**Alternatively**, pyrroloindole **18** can also be obtained from acetate **17** through the following procedure:

To a stirred solution of acetate **17** (121 mg, 0.2 mmol) in  $CH_2Cl_2$  (5 mL) at room temperature was added  $NaBH_3CN$  (124 mg, 2.0 mmol). The resulting mixture was stirred for 1 h before it was quenched with  $NaHCO_3$  (5 mL, sat. aq.). The layers were separated, and the aqueous layer was extracted with  $CH_2Cl_2$  ( $3 \times 10$  mL). The combined organic layers were dried ( $Na_2SO_4$ ) and concentrated *in vacuo*. Flash column chromatography (silica gel, hexanes:EtOAc 3:1) afforded pyrroloindole **18** (97 mg, 90%) as a yellow oil.

**Synthesis of pyrroloindole 18 through reductive decarboxylation of Barton ester:**

To a stirred solution of acid **16** (59 mg, 0.10 mmol) in THF (5 mL) at room temperature were added  $Et_3N$  (56  $\mu$ L, 0.40 mmol), DMAP (6 mg, 0.05 mmol) and  $HOTT^3$  (56 mg, 0.15 mmol). The resulting mixture was stirred in the dark for 2 h before it was added *t*-dodecanethiol (41 mg, 0.20 mmol). The resulting mixture was stirred at 65 °C for further 12 h before it was cooled to room temperature and diluted with  $H_2O$  (10 mL, sat. aq.). The layers were separated, and the aqueous layer was extracted with  $Et_2O$  ( $3 \times 10$  mL). The combined organic layers were dried ( $Na_2SO_4$ ) and concentrated *in vacuo*. Flash column chromatography (silica gel, hexanes:EtOAc 3:1) afforded pyrroloindole **18** (23 mg, 43%) as a yellow oil.

**Synthesis of pyrroloindole 18 through reductive decarboxylation of selenoester:**

To a stirred solution of acid **16** (59 mg, 0.10 mmol) in  $CH_2Cl_2$  (5 mL) at 0 °C were

added PhSeSePh (47 mg, 0.15 mmol) and *n*-Bu<sub>3</sub>P (76  $\mu$ L, 0.30 mmol). The resulting mixture was stirred at room temperature for 12 h before it was diluted with EtOAc (5 mL) and washed with H<sub>2</sub>O (5 mL). The organic layer was dried (Na<sub>2</sub>SO<sub>4</sub>) and concentrated *in vacuo*. Flash column chromatography (silica gel, hexanes:EtOAc 5:1) afforded crude selenoester (68 mg, 83%) as a yellow solid, which was subjected immediately into the next step.

To a stirred solution of the selenoester (crude, obtained above) in benzene (8 mL) were added AIBN (8 mg, 0.05 mmol) and (TMS)<sub>3</sub>SiH (138  $\mu$ L, 0.40 mmol). The resulting mixture was stirred at 80 °C for 24 h before it was cooled to room temperature and concentrated *in vacuo*. Flash column chromatography (silica gel, hexanes:EtOAc 3:1) afforded pyrroloindole **18** (29 mg, 54%) as a yellow oil.

**Amine 19:** To a stirred solution of pyrroloindole **18** (1.09 g, 2.0 mmol) in CH<sub>2</sub>Cl<sub>2</sub> (9

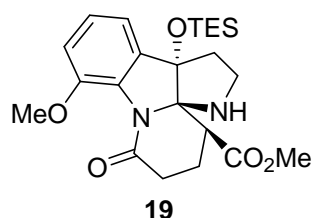

mL) at 0 °C was added CF<sub>3</sub>CO<sub>2</sub>H (3 mL). The resulting mixture was stirred at room temperature for 1 h before it was quenched with NaHCO<sub>3</sub> (20 mL, sat. aq.). The layers were

separated, and the aqueous layer was extracted with CH<sub>2</sub>Cl<sub>2</sub> (3  $\times$  20 mL). The combined organic layers were washed with brine (40 mL), dried (Na<sub>2</sub>SO<sub>4</sub>) and concentrated *in vacuo*. Flash column chromatography (silica gel, hexanes:EtOAc 1:1) afforded amine **19** (0.80 g, 90%) as a colorless oil. **19**: *R*<sub>f</sub> = 0.33 (hexanes:EtOAc 1:2); [ $\alpha$ ]<sub>D</sub><sup>20</sup> = +28.0 (*c* = 0.8, CHCl<sub>3</sub>); IR (film)  $\nu_{\text{max}}$  3572, 3423, 2974, 2812, 2364, 1738, 1668, 1474, 1239, 1126, 1031, 986, 768, 724 cm<sup>-1</sup>; <sup>1</sup>H NMR (400 MHz, CDCl<sub>3</sub>):  $\delta$  = 7.17 (t, *J* = 7.9 Hz, 1 H), 7.01–6.97 (m, 1 H), 6.94 (d, *J* = 7.9 Hz, 1 H), 3.88 (s, 3 H), 3.73 (s, 3 H), 3.10

(dd,  $J = 13.1, 2.8$  Hz, 1 H), 2.91 (t,  $J = 9.1$  Hz, 1 H), 2.83 (ddd,  $J = 17.8, 6.6, 1.4$  Hz, 1 H), 2.50–2.15 (m, 6 H), 2.08 (ddd,  $J = 4.9, 2.8, 1.4$  Hz, 1 H), 0.82 (t,  $J = 7.9$  Hz, 9 H), 0.45 ppm (m,  $J = 8.4, 4.4$  Hz, 6 H);  $^{13}\text{C}$  NMR (100 MHz,  $\text{CDCl}_3$ ):  $\delta = 173.1, 167.1, 151.3, 136.9, 130.9, 126.5, 116.1, 113.8, 92.1, 88.3, 56.1, 51.7, 44.6, 43.8, 37.2, 32.1, 21.6, 6.7$  (3C), 6.1 ppm (3C); HRMS (ESI): calcd for  $\text{C}_{23}\text{H}_{35}\text{N}_2\text{O}_5\text{Si}^+$  [ $\text{M} + \text{H}^+$ ] 447.2310, found 447.2312.

**Vinyl bromide 21:** To a stirred solution of amine **19** (580 mg, 1.3 mmol) in MeCN (10

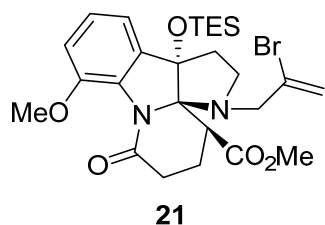

mL) were added allyl iodide **20** (642 mg, 2.6 mmol) and  $\text{K}_2\text{CO}_3$  (542 mg, 3.9 mmol). The resulting mixture was stirred at 50 °C for 12 h before it was cooled to room

temperature and filtered through a short pad of celite. The filtrate was diluted with EtOAc (15 mL) and washed with brine (15 mL). The organic layer was dried ( $\text{Na}_2\text{SO}_4$ ) and concentrated *in vacuo*. Flash column chromatography (silica gel, hexanes:EtOAc 3:1) afforded vinyl bromide **21** (623 mg, 85%) as a colorless oil. **21**:  $R_f = 0.40$  (hexanes:EtOAc 3:1);  $[\alpha]_D^{20} = +64.5$  ( $c = 1.0$ ,  $\text{CHCl}_3$ ); IR (film)  $\nu_{\text{max}}$  2972, 2874, 2831, 2370, 1729, 1667, 1478, 1379, 1253, 1166, 1017, 775, 735  $\text{cm}^{-1}$ ;  $^1\text{H}$  NMR (400 MHz,  $\text{CDCl}_3$ ):  $\delta = 7.20$  (s, 1 H), 7.00–6.94 (m, 2 H), 5.87 (d,  $J = 1.4$  Hz, 1 H), 5.46–5.41 (m, 1 H), 3.93 (d,  $J = 15.5$  Hz, 4 H), 3.72 (s, 3 H), 3.20 (dd,  $J = 12.7, 3.3$  Hz, 1 H), 3.04 (t,  $J = 8.2$  Hz, 1 H), 2.88 (ddd,  $J = 17.7, 6.1, 2.2$  Hz, 1 H), 2.73 (d,  $J = 16.8$  Hz, 1 H), 2.53–2.36 (m, 2 H), 2.35–2.23 (m, 2 H), 2.11–2.02 (m, 1 H), 1.78 (ddd,  $J = 11.2, 8.5, 6.4$  Hz, 1 H), 0.82 (t, 9 H), 0.48 ppm (m, 6 H);  $^{13}\text{C}$  NMR (100 MHz,  $\text{CDCl}_3$ ):  $\delta = 171.6, 168.4, 151.5, 137.5, 131.2, 130.7, 127.1, 116.9, 115.6, 114.1, 92.2, 87.7, 59.9, 56.3,$

51.5, 50.8, 45.9, 34.1, 31.5, 20.6, 6.7 (3C), 6.1 ppm (3C); HRMS (ESI): calcd for  $C_{26}H_{38}BrN_2O_5Si^+$  [ $M + H^+$ ] 565.1728, found 565.1730.

**Enone *ent*-5 and Amine 22:** To a stirred solution of vinyl bromide **21** (620 mg, 1.1

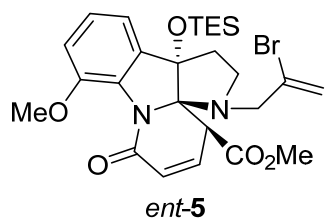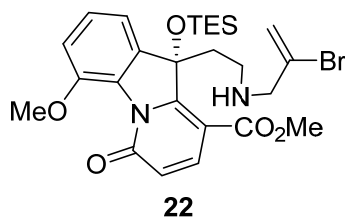

mmol) in THF (10 mL) at –  
78 °C was added LiHMDS  
(1.0 M in THF, 1.65 mL,

1.65 mmol). The resulting mixture was stirred for 0.5 h before it was added a solution of PhSeCl (316 mg, 1.65mmol) in THF (10 ml). The resulting mixture was stirred at –78 °C for further 0.5 h before it was diluted with EtOAc (15 mL) and quenched with NaHCO<sub>3</sub> (10 mL, sat. aq.). The layers were separated, and the aqueous layer was extracted with EtOAc (3 × 10 mL). The combined organic layers were washed with brine (20 mL), dried (Na<sub>2</sub>SO<sub>4</sub>) and concentrated *in vacuo*. Flash column chromatography (silica gel, hexanes:EtOAc 5:1) afforded crude selenide (750 mg, 95%), which was subjected immediately into the next step.

To a stirred solution of the selenide (crude, obtained above) in THF (10 mL) at room temperature was added H<sub>2</sub>O<sub>2</sub> (30% wt/wt in H<sub>2</sub>O, 0.34 mL, 3.0 mmol). The resulting mixture was stirred for 0.5 h before it was diluted with Et<sub>2</sub>O (5 mL) and quenched with Na<sub>2</sub>S<sub>2</sub>O<sub>3</sub> (10 mL, sat. aq.). The layers were separated, and the aqueous layer was extracted with Et<sub>2</sub>O (3 × 10 mL). The combined organic layers were washed with brine (20 mL), dried (Na<sub>2</sub>SO<sub>4</sub>) and concentrated *in vacuo*. Flash column chromatography (silica gel, hexanes:EtOAc 5:1) afforded enone *ent*-5 (56 mg, 10%) as a colorless oil, along with amine **22** (365 mg, 65%) as a colorless oil.

**ent-5**:  $R_f = 0.32$  (hexanes:EtOAc 5:1);  $[\alpha]_D^{20} = +45.6$  ( $c = 1.0$ ,  $\text{CHCl}_3$ ); IR (film)  $\nu_{\text{max}}$  2971, 2868, 2816, 2371, 1735, 1671, 1476, 1379, 1238, 1173, 1133, 1015, 741, 713  $\text{cm}^{-1}$ ;  $^1\text{H}$  NMR (400 MHz,  $\text{CDCl}_3$ ):  $\delta = 7.20$  (t,  $J = 7.9$  Hz, 1 H), 7.05–6.95 (m, 2 H), 6.81 (dd,  $J = 10.1, 2.1$  Hz, 1 H), 6.12 (dd,  $J = 10.1, 3.2$  Hz, 1 H), 5.45 (s, 1 H), 5.35 (s, 1 H), 4.39–4.34 (m, 1 H), 3.93 (s, 3 H), 3.78 (s, 3 H), 3.75–3.65 (m, 1 H), 3.13 (d,  $J = 15.5$  Hz, 1 H), 2.85 (t,  $J = 8.0$  Hz, 1 H), 2.68–2.57 (m, 1 H), 2.23 (dd,  $J = 11.6, 5.5$  Hz, 1 H), 1.88–1.78 (m, 1 H), 0.82 (t,  $J = 7.9$  Hz, 9 H), 0.54–0.42 ppm (m, 6 H);  $^{13}\text{C}$  NMR (100 MHz,  $\text{CDCl}_3$ ):  $\delta = 169.7, 160.6, 150.8, 137.8, 136.8, 130.5, 129.8, 126.9, 123.3, 117.9, 115.9, 114.4, 90.8, 88.5, 57.9, 56.4, 52.1, 49.1, 46.5, 35.7, 6.7$  (3C), 6.2 ppm (3C); HRMS (ESI): calcd for  $\text{C}_{26}\text{H}_{36}\text{BrN}_2\text{O}_5\text{Si}^+ [\text{M} + \text{H}^+]$  563.1571, found 563.1575.

**22**:  $R_f = 0.22$  (hexanes:EtOAc 2:1);  $[\alpha]_D^{20} = -31.2$  ( $c = 1.0$ ,  $\text{CHCl}_3$ ); IR (film)  $\nu_{\text{max}}$  3351, 2968, 2874, 2843, 2372, 1671, 1552, 1485, 1248, 1099, 1033, 964, 768, 732  $\text{cm}^{-1}$ ;  $^1\text{H}$  NMR (400 MHz,  $\text{CDCl}_3$ ):  $\delta = 7.72$  (d,  $J = 9.6$  Hz, 1 H), 7.32 (t,  $J = 7.9$  Hz, 1 H), 7.08 (dd,  $J = 7.9, 3.6$  Hz, 2 H), 6.56 (d,  $J = 9.6$  Hz, 1 H), 5.54 (d,  $J = 1.3$  Hz, 1 H), 5.38 (d,  $J = 1.6$  Hz, 1 H), 3.99 (s, 3H), 3.88 (s, 3 H), 3.30–3.20 (m, 1 H), 3.17 (s, 2 H), 2.42–2.32 (m, 1 H), 2.08 (t,  $J = 7.4$  Hz, 2 H), 0.72 (t,  $J = 7.9$  Hz, 9 H), 0.20 ppm (q,  $J = 8.0$  Hz, 6 H);  $^{13}\text{C}$  NMR (100 MHz,  $\text{CDCl}_3$ ):  $\delta = 164.4, 159.3, 158.1, 149.3, 138.8, 138.7, 132.9, 128.4, 127.6, 120.9, 117.3, 116.1, 115.8, 109.3, 83.2, 57.1, 56.8, 52.1, 42.5, 41.5, 6.6$  (3C), 5.5 ppm (3C); HRMS (ESI): calcd for  $\text{C}_{26}\text{H}_{36}\text{BrN}_2\text{O}_5\text{Si}^+ [\text{M} + \text{H}^+]$  563.1571, found 563.1573.

**Tetracycle C16-*epi-ent*-4**: To a stirred solution of amine **22** (303 mg, 0.54 mmol) in toluene (10 mL) at  $-78$  °C were added  $n\text{-Bu}_3\text{SnH}$  (0.17 mL, 0.64 mmol) and  $\text{Et}_3\text{B}$  (57



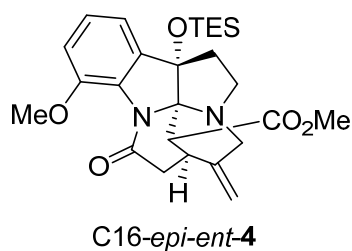

$\mu\text{L}$ , 0.54 mmol). The resulting mixture was stirred for 0.5 h before it was warmed to 0 °C and stirred for an additional 2 h. The solvent was removed, and flash column chromatography (silica gel, hexanes:EtOAc 1:1)

afforded tetracycle C16-*epi-ent-4* (183 mg, 70%) as a white amorphous solid. C16-*epi-ent-4*:  $R_f$  = 0.23 (hexanes:EtOAc 3:1);  $[\alpha]_D^{20}$  = +126.5 ( $c$  = 1.0,  $\text{CHCl}_3$ ); IR (film)  $\nu_{\text{max}}$  2971, 2868, 2822, 2361, 1741, 1683, 1485, 1395, 1237, 1135, 1012, 761, 729  $\text{cm}^{-1}$ ;  $^1\text{H}$  NMR (400 MHz,  $\text{CDCl}_3$ ):  $\delta$  = 7.13 (t,  $J$  = 7.9 Hz, 1 H), 6.99 (d,  $J$  = 7.5 Hz, 1 H), 6.91 (d,  $J$  = 8.2 Hz, 1 H), 4.82 (d,  $J$  = 10.7 Hz, 2 H), 3.87 (s, 3 H), 3.66 (s, 4 H), 3.36 (d,  $J$  = 13.1 Hz, 1 H), 3.25–3.19 (m, 1 H), 2.98–2.88 (m, 2 H), 2.79 (d,  $J$  = 1.7 Hz, 1 H), 2.73–2.62 (m, 2 H), 2.22–2.13 (m, 1 H), 2.09 (dd,  $J$  = 10.6, 4.3 Hz, 1 H), 0.82 (t,  $J$  = 7.9 Hz, 9 H), 0.47 ppm (q,  $J$  = 7.8 Hz, 6 H);  $^{13}\text{C}$  NMR (100 MHz,  $\text{CDCl}_3$ ):  $\delta$  = 169.7, 166.6, 149.8, 143.3, 136.6, 130.7, 126.1, 116.6, 114.3, 111.1, 89.9, 89.2, 56.3, 51.3, 49.01, 48.5, 47.5, 40.5, 40.2, 40.1, 6.8 (3C), 6.3 ppm (3C); HRMS (ESI): calcd for  $\text{C}_{26}\text{H}_{37}\text{N}_2\text{O}_5\text{Si}^+ [\text{M} + \text{H}^+]$  485.2466, found 485.2467.

**Alternatively**, tetracycle C16-*epi-ent-4* can also be obtained from enone *ent-5* through the following procedure:

To a stirred solution of enone *ent-5* (264 mg, 0.47 mmol) and AIBN (77 mg, 0.47 mmol) in benzene (5 mL) at 80 °C were added *n*- $\text{Bu}_3\text{SnH}$  (253  $\mu\text{L}$ , 0.94 mmol). The resulting mixture was stirred for 0.5 h before it was cooled to room temperature and concentrated *in vacuo*. Flash column chromatography (silica gel, hexanes:EtOAc 1:1) afforded tetracycle C16-*epi-ent-4* (186 mg, 82%) as a white amorphous solid.

**Alcohol 24:** To a stirred solution of tetracycle C16-*epi-ent*-4 (126 mg, 0.26 mmol) and

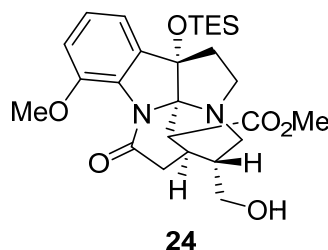

Rh(PPh<sub>3</sub>)<sub>3</sub>Cl (120 mg, 0.13 mmol) in THF (5 mL) at 0 °C was added catecholborane (140 μL, 1.32 mmol). The resulting mixture was warmed to room temperature and

stirred for 2 h before it was added NaOH (3 M aq., 0.43 mL, 1.3 mmol) and H<sub>2</sub>O<sub>2</sub> (30% wt/wt in H<sub>2</sub>O, 0.15 mL, 1.3 mmol). The resulting mixture was stirred for 1 h before it was quenched with NaHCO<sub>3</sub> (5 mL, sat. aq.). The layers were separated, and the aqueous layer was extracted with EtOAc (3 × 10 mL). The combined organic layers were washed with brine (10 mL), dried (Na<sub>2</sub>SO<sub>4</sub>) and concentrated *in vacuo*. Flash column chromatography (silica gel, EtOAc) afforded alcohol **24** (109 mg, 84%) as a white amorphous solid. **24**: *R*<sub>f</sub> = 0.40 (EtOAc); [ $\alpha$ ]<sub>D</sub><sup>20</sup> = +95.3 (*c* = 1.2, CHCl<sub>3</sub>); IR (film)  $\nu_{\text{max}}$  2970, 2858, 2831, 2358, 1736, 1679, 1474, 1386, 1246, 1138, 1017, 971, 758, 732 cm<sup>-1</sup>; <sup>1</sup>H NMR (400 MHz, CDCl<sub>3</sub>):  $\delta$  = 7.17–7.11 (m, 1 H), 6.99 (dd, *J* = 7.5, 0.9 Hz, 1 H), 6.92 (dd, *J* = 8.2, 0.6 Hz, 1 H), 3.90 (s, 3 H), 3.70 (s, 3 H), 3.64–3.56 (m, 1 H), 3.17 (dd, *J* = 11.9, 4.4 Hz, 1 H), 2.97 (dd, *J* = 18.1, 8.0 Hz, 1 H), 2.89–2.81 (m, 3 H), 2.81–2.74 (m, 1 H), 2.66 (dd, *J* = 9.7, 8.3 Hz, 2 H), 2.17–2.06 (m, 2 H), 1.80 (s, 2 H), 1.62 (s, 1 H), 0.82 (t, *J* = 7.9 Hz, 9 H), 0.51–0.42 ppm (m, 6 H); <sup>13</sup>C NMR (100 MHz, CDCl<sub>3</sub>):  $\delta$  = 171.2, 166.8, 149.7, 136.9, 130.5, 126.1, 116.5, 114.2, 90.3, 89.1, 64.7, 56.3, 51.4, 49.4, 45.4, 44.0, 42.9, 42.1, 39.6, 33.1, 6.8 (3C), 6.3 ppm (3C); HRMS (ESI): calcd for C<sub>26</sub>H<sub>39</sub>N<sub>2</sub>O<sub>6</sub>Si<sup>+</sup> [*M* + H<sup>+</sup>] 503.2572, found 503.2576.

**Aldehyde 25:** To a stirred solution of alcohol **24** (50 mg, 0.1 mmol) in CH<sub>2</sub>Cl<sub>2</sub> (5 mL) at room temperature were added NaHCO<sub>3</sub> (50 mg, 0.6 mmol) and Dess–Martin

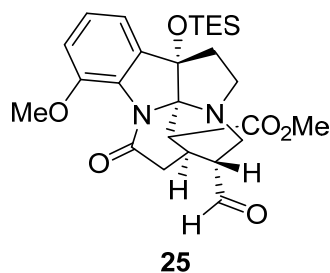

periodinane (46 mg, 0.11 mmol). The resulting mixture was stirred for 0.5 h before it was diluted with CH<sub>2</sub>Cl<sub>2</sub> (10 mL) and quenched with Na<sub>2</sub>S<sub>2</sub>O<sub>3</sub> (5 mL, sat. aq.). The layers were separated, and the aqueous layer was extracted with CH<sub>2</sub>Cl<sub>2</sub> (3 × 10 mL). The combined organic layers were dried (Na<sub>2</sub>SO<sub>4</sub>) and concentrated *in vacuo*. Flash column chromatography (silica gel, EtOAc) afforded aldehyde **25** (44 mg, 88%) as a white amorphous solid. **25**: *R*<sub>f</sub> = 0.65 (EtOAc); [ $\alpha$ ]<sub>D</sub><sup>20</sup> = +112.4 (*c* = 0.7, CHCl<sub>3</sub>); IR (film)  $\nu_{\text{max}}$  2983, 2976, 2820, 2353, 1730, 1661, 1468, 1429, 1386, 1249, 1178, 1024, 754, 714 cm<sup>-1</sup>; <sup>1</sup>H NMR (400 MHz, CDCl<sub>3</sub>):  $\delta$  = 9.62 (s, 1 H), 7.15 (t, *J* = 7.9 Hz, 1 H), 7.01–6.96 (m, 1 H), 6.93 (d, *J* = 8.1 Hz, 1 H), 3.90 (s, 3 H), 3.64 (s, 3 H), 3.41–3.30 (m, 3 H), 3.00 (ddd, *J* = 14.8, 13.1, 7.6 Hz, 2 H), 2.75–2.59 (m, 3 H), 2.20–2.02 (m, 3 H), 0.81 (t, *J* = 7.9 Hz, 9 H), 0.54–0.41 ppm (m, 6 H); <sup>13</sup>C NMR (100 MHz, CDCl<sub>3</sub>)  $\delta$  = 203.1, 170.1, 166.3, 149.7, 136.4, 130.5, 126.2, 116.6, 114.2, 89.6, 89.1, 56.2, 51.5, 51.2, 49.2, 44.7, 42.2, 40.2, 39.9, 31.5, 6.8 (3C), 6.3 ppm (3C); HRMS (ESI): calcd for C<sub>26</sub>H<sub>37</sub>N<sub>2</sub>O<sub>6</sub>Si<sup>+</sup> [*M* + *H*<sup>+</sup>] 501.2415, found 501.2417.

**Aldehyde 27**: To a stirred solution of aldehyde **25** (80 mg, 0.16 mmol) in MeCN (5 mL) at room temperature was added HF·py (0.73 mL, 8.0 mmol). The resulting mixture was stirred for 12 h before it was quenched with NaHCO<sub>3</sub> (20 mL, sat. aq.). The layers were separated, and the aqueous layer was extracted with

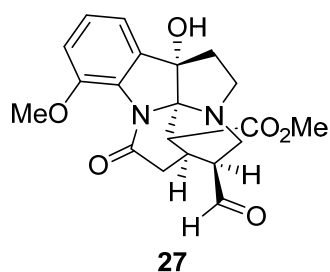

EtOAc (3 × 10 mL). The combined organic layers were washed with brine (5 mL), dried (Na<sub>2</sub>SO<sub>4</sub>) and concentrated *in vacuo*. Flash column chromatography (silica gel,

CH<sub>2</sub>Cl<sub>2</sub>:MeOH 10:1) afforded aldehyde **27** (53 mg, 86%) as a white amorphous solid.

**27**:  $R_f$  = 0.59 (CH<sub>2</sub>Cl<sub>2</sub>:MeOH 10:1);  $[\alpha]_D^{20}$  = +25.6 ( $c$  = 0.8, CHCl<sub>3</sub>); IR (film)  $\nu_{\max}$  3391, 3306, 2983, 2835, 2348, 1809, 1732, 1652, 1482, 1424, 1393, 1271, 1168, 1130, 1021, 924, 756, 720 cm<sup>-1</sup>; <sup>1</sup>H NMR (400 MHz, CDCl<sub>3</sub>):  $\delta$  = 9.72 (s, 1 H), 7.19 (t,  $J$  = 7.8 Hz, 1 H), 7.08–7.04 (m, 1 H), 6.92 (d,  $J$  = 8.0 Hz, 1 H), 5.21 (s, 1 H), 3.89 (s, 3 H), 3.87 (s, 3 H), 3.47–3.41 (m, 1 H), 3.18–3.09 (m, 2 H), 3.07–2.98 (m, 2 H), 2.78–2.54 (m, 3 H), 2.45–2.34 (m, 1 H), 2.12–1.99 (m, 2 H); <sup>13</sup>C NMR (100 MHz, CDCl<sub>3</sub>):  $\delta$  = 201.4, 171.8, 166.2, 149.2, 136.2, 129.8, 126.9, 115.9, 113.9, 89.1, 88.7, 56.2, 53.1, 49.4, 48.2, 47.7, 42.6, 40.6, 34.8, 29.3 ppm; HRMS (ESI): calcd for C<sub>20</sub>H<sub>23</sub>N<sub>2</sub>O<sub>6</sub><sup>+</sup> [M + H<sup>+</sup>] 387.1551, found 387.1554.

**Aldehyde 26**: To a stirred solution of aldehyde **25** (100 mg, 0.2 mmol) in MeCN (5

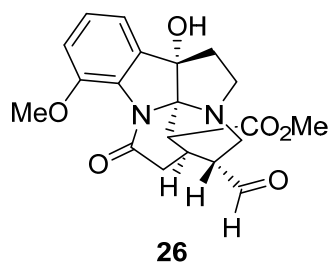

mL) at room temperature were added HF·py (0.91 mL, 10.0 mmol). The resulting mixture was stirred for 6 h before it was quenched with NaHCO<sub>3</sub> (20 mL, sat. aq.). The layers were separated, and the aqueous layer was extracted with

EtOAc (3 × 10 mL). The combined organic layers were washed with brine (5 mL), dried (Na<sub>2</sub>SO<sub>4</sub>) and concentrated *in vacuo*. Flash column chromatography (silica gel, CH<sub>2</sub>Cl<sub>2</sub>:MeOH 10:1) afforded both aldehydes **26** (41 mg, 53%) and **27** (29 mg, 38%) as white amorphous solids. **26**:  $R_f$  = 0.62 (CH<sub>2</sub>Cl<sub>2</sub>:MeOH 10:1);  $[\alpha]_D^{20}$  = +108.3 ( $c$  = 0.5, CHCl<sub>3</sub>); IR (film)  $\nu_{\max}$  3389, 3301, 2969, 2835, 2349, 1816, 1723, 1648, 1469, 1441, 1362, 1264, 1157, 1138, 1028, 931, 744, 718 cm<sup>-1</sup>; <sup>1</sup>H NMR (400 MHz, CDCl<sub>3</sub>):  $\delta$  = 9.62 (s, 1 H), 7.21 (t,  $J$  = 7.8 Hz, 1 H), 7.06 (dd,  $J$  = 7.5, 0.8 Hz, 1 H), 6.94 (d,  $J$  =

8.1 Hz, 1 H), 5.07 (s, 1 H), 3.91 (s, 3 H), 3.73 (s, 3 H), 3.45 (d,  $J = 12.0$  Hz, 1 H), 3.37 (dd,  $J = 6.8, 5.3$  Hz, 1 H), 3.15 (dd,  $J = 12.0, 4.8$  Hz, 1 H), 2.95 (d,  $J = 2.0$  Hz, 1 H), 2.83 (dd,  $J = 8.5, 6.4$  Hz, 1 H), 2.79–2.67 (m, 2 H), 2.40 (d,  $J = 6.5$  Hz, 1 H), 2.24 (d,  $J = 4.8$  Hz, 1 H), 2.13–1.96 ppm (m, 2 H);  $^{13}\text{C}$  NMR (100 MHz,  $\text{CDCl}_3$ ):  $\delta = 200.7, 171.5, 166.2, 149.3, 136.6, 129.7, 127.1, 116.1, 113.8, 88.6, 88.4, 56.2, 52.3, 51.3, 48.5, 46.7, 41.2, 40.6, 40.1, 30.3$  ppm; HRMS (ESI): calcd for  $\text{C}_{20}\text{H}_{23}\text{N}_2\text{O}_6^+$  [ $\text{M} + \text{H}^+$ ] 387.1551, found 387.1552.

**(+)-Asmaphorzaine E (*ent*-3) and C19-*epi-ent*-3:** To a stirred solution of aldehyde **27**

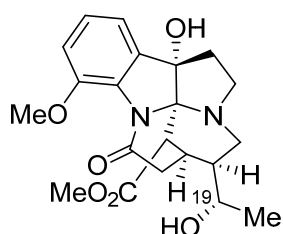

(+)-asmaphorzaine E (*ent*-3)

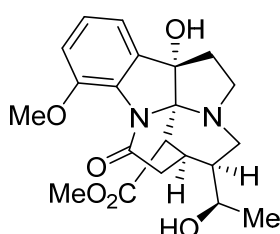

C19-*epi-ent*-3

(40 mg, 0.10 mmol) in THF (2 mL)

at  $-78^\circ\text{C}$  was added MeMgBr (3.0

M in  $\text{Et}_2\text{O}$ , 0.17 mL, 0.52 mmol).

The resulting mixture was stirred

for 0.5 h before it was quenched with  $\text{NaHCO}_3$  (10 mL, sat. aq.). The layers were separated, and the aqueous layer was extracted with EtOAc ( $4 \times 5$  mL). The combined organic layers were washed with brine (5 mL), dried ( $\text{Na}_2\text{SO}_4$ ) and concentrated *in vacuo* to afford the crude alcohol (38 mg, 90%, ca. 3:1 mixture of inseparable diastereomers by  $^1\text{H}$  NMR) as a colorless oil, which was used directly in the next step.

To a stirred solution of the alcohol (crude, obtained above) in toluene (2 mL) at  $90^\circ\text{C}$  was added DBU (74  $\mu\text{L}$ , 0.52 mmol). The resulting mixture was stirred for 16 h before it was diluted with EtOAc (10 mL) and quenched with  $\text{NaHCO}_3$  (10 mL, sat. aq.). The layers were separated, and the aqueous layer was extracted with EtOAc ( $3 \times 10$  mL). The combined organic layers were dried ( $\text{Na}_2\text{SO}_4$ ) and concentrated *in vacuo*.

Flash column chromatography (silica gel, EtOAc) afforded (+)-asmaphorzaine E (*ent*-**3**) (26 mg, 68%) as a white solid, along with C19-*epi-ent*-**3** (8 mg, 20%) as a white solid. *ent*-**3**:  $R_f$  = 0.12 (EtOAc); m.p. 257–259 °C (EtOAc/hexanes);  $[\alpha]_D^{20}$  = +35.8 ( $c$  = 0.4, MeOH); Lit.  $[\alpha]_D^{20}$  = +26 ( $c$  = 0.1, MeOH);<sup>4</sup> IR (film)  $\nu_{\max}$  3383, 2985, 2808, 1588, 1462, 1437, 1382, 1317, 1206, 1021, 910, 756, 712  $\text{cm}^{-1}$ ;  $^1\text{H}$  NMR (400 MHz,  $\text{CD}_3\text{OD}$ ):  $\delta$  = 7.22 (t,  $J$  = 7.8 Hz, 1 H), 7.04 (d,  $J$  = 7.7 Hz, 1 H), 7.00 (d,  $J$  = 8.2 Hz, 1 H), 3.85 (s, 3 H), 3.69 (dq,  $J$  = 9.5, 6.1 Hz, 1 H), 3.60 (s, 3 H), 3.06 (d,  $J$  = 2.8 Hz, 1 H), 3.04–2.97 (m, 1 H), 2.85 (dd,  $J$  = 11.6, 4.9 Hz, 1 H), 2.78 (d,  $J$  = 18.8 Hz, 1 H), 2.74 (dd,  $J$  = 8.7, 6.5 Hz, 1 H), 2.61 (dd,  $J$  = 11.6, 11.5 Hz, 1 H), 2.37 (dd,  $J$  = 18.8, 8.5 Hz, 1 H), 2.27–2.19 (m, 1 H), 2.09–2.00 (m, 1 H), 1.94 (dd,  $J$  = 11.2, 3.8 Hz, 1 H), 1.90–1.84 (m, 1 H), 1.24 ppm (d,  $J$  = 6.1 Hz, 3 H);  $^{13}\text{C}$  NMR (125 MHz,  $\text{CD}_3\text{OD}$ ):  $\delta$  = 173.7, 171.5, 150.8, 138.7, 131.7, 128.0, 117.1, 115.2, 89.2, 88.8, 66.7, 56.7, 52.2, 49.6, 48.9, 48.7, 45.9, 43.3, 32.3, 31.8, 22.3 ppm; HRMS (ESI): calcd for  $\text{C}_{21}\text{H}_{27}\text{N}_2\text{O}_6^+$   $[\text{M} + \text{H}^+]$  403.1864, found 403.1864.

**C19-*epi-ent*-3**:  $R_f$  = 0.10 (EtOAc); m.p. 236–238 °C;  $[\alpha]_D^{20}$  = +52.8 ( $c$  = 0.5, MeOH); IR (film)  $\nu_{\max}$  3386, 2954, 2821, 1583, 1452, 1421, 1401, 1322, 1208, 1122, 1032, 910, 754, 716  $\text{cm}^{-1}$ ;  $^1\text{H}$  NMR (400 MHz,  $\text{CD}_3\text{OD}$ ):  $\delta$  = 7.26–7.19 (m, 1 H), 7.03 (ddd,  $J$  = 13.6, 7.9, 0.9 Hz, 2 H), 3.86 (s, 3 H), 3.74–3.67 (m, 1 H), 3.60 (s, 3 H), 3.23 (dd,  $J$  = 11.9, 4.8 Hz, 1 H), 3.11–3.05 (m, 1 H), 2.79–2.64 (m, 4 H), 2.37 (dd,  $J$  = 18.7, 8.5 Hz, 1 H), 2.24 (td,  $J$  = 11.0, 6.4 Hz, 1 H), 2.06 (ddd,  $J$  = 10.8, 8.8, 4.0 Hz, 1 H), 1.94 (dd,  $J$  = 11.3, 3.8 Hz, 1 H), 1.91–1.81 (m, 1 H), 1.24 ppm (d,  $J$  = 6.3 Hz, 3 H);  $^{13}\text{C}$  NMR (100 MHz,  $\text{CD}_3\text{OD}$ ):  $\delta$  = 173.5, 171.1, 150.7, 138.6, 131.6, 128.0, 117.0, 115.2, 89.3, 88.8,

68.5, 56.6, 52.2, 49.7, 48.8, 48.6, 46.1, 43.3, 33.8, 31.6, 21.8 ppm; HRMS (ESI): calcd for  $\text{C}_{21}\text{H}_{27}\text{N}_2\text{O}_6^+$   $[\text{M} + \text{H}^+]$  403.1864, found 403.1863.

**Table 1.**  $^1\text{H}$  NMR Spectroscopic ( $\text{CD}_3\text{OD}$ ,  $25^\circ\text{C}$ ) Comparison of Synthetic and Natural**(+)-Alsmaphorazine E (*ent*-**3**)**<sup>4</sup>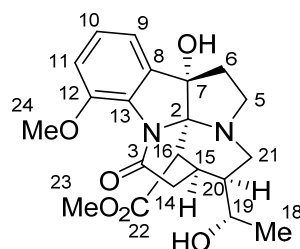**(+)-asmaphorzaine E (*ent*-**3**)**

| No. | Natural <sup>4</sup>                        | Synthetic                                   |
|-----|---------------------------------------------|---------------------------------------------|
|     | $\delta$ $^1\text{H}$ [ppm, mult, $J$ (Hz)] | $\delta$ $^1\text{H}$ [ppm, mult, $J$ (Hz)] |
| 2   |                                             |                                             |
| 3   |                                             |                                             |
| 5a  | 2.75 (dd, $J$ = 8.7, 6.5 Hz)                | 2.74 (dd, $J$ = 8.7, 6.5 Hz)                |
| 5b  | 2.04 (m)                                    | 2.09–2.00 (m)                               |
| 6a  | 2.23 (m)                                    | 2.27–2.19 (m)                               |
| 6b  | 1.93 (dd, $J$ = 11.5, 3.8 Hz)               | 1.93 (dd, $J$ = 11.2, 3.8 Hz)               |
| 7   |                                             |                                             |
| 8   |                                             |                                             |
| 9   | 7.03 (d, $J$ = 7.7 Hz)                      | 7.04 (d, $J$ = 7.7 Hz)                      |
| 10  | 7.22 (dd, $J$ = 8.0, 7.7 Hz)                | 7.22 (dd, $J$ = 7.8, 7.8 Hz)                |
| 11  | 7.00 (d, $J$ = 8.0 Hz)                      | 7.00 (d, $J$ = 8.2 Hz)                      |
| 12  |                                             |                                             |
| 13  |                                             |                                             |
| 14a | 2.76 (d, $J$ = 18.8 Hz)                     | 2.78 (d, $J$ = 18.8 Hz)                     |
| 14b | 2.37 (dd, $J$ = 18.8, 8.5 Hz)               | 2.37 (dd, $J$ = 18.8, 8.5 Hz)               |
| 15  | 3.00 (m)                                    | 3.04–2.97 (m)                               |
| 16  | 3.05 (d, $J$ = 2.8 Hz)                      | 3.05 (d, $J$ = 2.8 Hz)                      |
| 18  | 1.24 (d, $J$ = 6.1 Hz)                      | 1.24 (d, $J$ = 6.1 Hz)                      |
| 19  | 3.68 (dq, $J$ = 9.5, 6.1 Hz)                | 3.69 (dq, $J$ = 9.5, 6.1 Hz)                |
| 20  | 1.88 (m)                                    | 1.90–1.84 (m)                               |
| 21a | 2.85 (dd, $J$ = 11.5, 3.8 Hz)               | 2.85 (dd, $J$ = 11.6, 4.9 Hz)               |
| 21b | 2.61 (dd, $J$ = 11.6, 11.5 Hz)              | 2.61 (dd, $J$ = 11.6, 11.5 Hz)              |
| 22  |                                             |                                             |
| 23  | 3.60 (s)                                    | 3.60 (s)                                    |
| 24  | 3.85 (s)                                    | 3.85 (s)                                    |



**Table 2.**  $^{13}\text{C}$  NMR Spectroscopic ( $\text{CD}_3\text{OD}$ ,  $25\text{ }^\circ\text{C}$ ) Comparison of Synthetic and Natural**(+)-alsmaphorazine E (*ent*-3)<sup>4</sup>**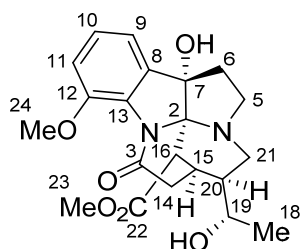**(+)-alsmaphorazine E (*ent*-3)**

| No. | Natural <sup>4</sup>                | Synthetic                           |
|-----|-------------------------------------|-------------------------------------|
|     | $\delta\text{ }^{13}\text{C}$ (ppm) | $\delta\text{ }^{13}\text{C}$ (ppm) |
| 2   | 89.1                                | 89.2                                |
| 3   | 171.3                               | 171.5                               |
| 5a  | 48.8                                | 48.7                                |
| 5b  |                                     |                                     |
| 6a  | 43.3                                | 43.3                                |
| 6b  |                                     |                                     |
| 7   | 88.8                                | 88.8                                |
| 8   | 138.8                               | 138.7                               |
| 9   | 117.1                               | 117.1                               |
| 10  | 128.0                               | 128.0                               |
| 11  | 115.3                               | 115.2                               |
| 12  | 150.9                               | 150.8                               |
| 13  | 131.7                               | 131.7                               |
| 14a | 31.8                                | 31.8                                |
| 14b |                                     |                                     |
| 15  | 32.4                                | 32.3                                |
| 16  | 49.7                                | 49.6                                |
| 18  |                                     |                                     |
| 19  | 66.7                                | 66.7                                |
| 20  | 48.9                                | 48.9                                |
| 21a | 45.9                                | 45.9                                |
| 21b |                                     |                                     |
| 22  | 173.8                               | 173.7                               |
| 23  | 52.2                                | 52.2                                |
| 24  | 56.7                                | 56.7                                |

## II) Abbreviations

|        |                                                                                   |
|--------|-----------------------------------------------------------------------------------|
| AIBN   | 2,2'-azobis(2-methylpropionitrile)                                                |
| CAN    | cerium ammonium nitrate                                                           |
| DBU    | 1,8-diazabicyclo[5.4.0]undec-7-ene                                                |
| DMAP   | <i>N,N</i> -Dimethylpyridin-4-amine                                               |
| DMF    | <i>N,N</i> -Dimethylformamide                                                     |
| HOTT   | <i>S</i> -(1-oxido-2-pyridinyl) 1,1,3,3-tetramethylthiuronium hexafluorophosphate |
| LiHMDS | lithium bis(trimethylsilyl)amide                                                  |
| py     | pyridine                                                                          |
| TESOTf | triethylsilyltrifluoromethanesulfonate                                            |

## III) References

- 1 For its preparation, see: (a) C. Ma, X. Liu, X. Li, J. Flippen-Anderson, S. Yu and J. M. Cook, *J. Org. Chem.*, 2001, **66**, 4525; (b) H. Zhou, X. Liao, W. Yin, J. Ma and J. M. Cook, *J. Org. Chem.*, 2006, **71**, 251.
- 2 K. R. Prabhu, N. Pillarsetty, H. Gali and K. V. Katti, *J. Am. Chem. Soc.*, 2000, **122**, 1554.
- 3 P. Garner, J. T. Anderson, S. Dey, W. J. Youngs and K. Galat, *J. Org. Chem.*, 1998, **63**, 5732.
- 4 K. Koyama, Y. Hirasawa, A. E. Nugroho, T. Kaneda, T. C. Hoe, K.-L. Chan and H. Morita, *Tetrahedron*, 2012, **68**, 1502.

#### IV) $^1\text{H}$ and $^{13}\text{C}$ NMR Spectra of Compounds

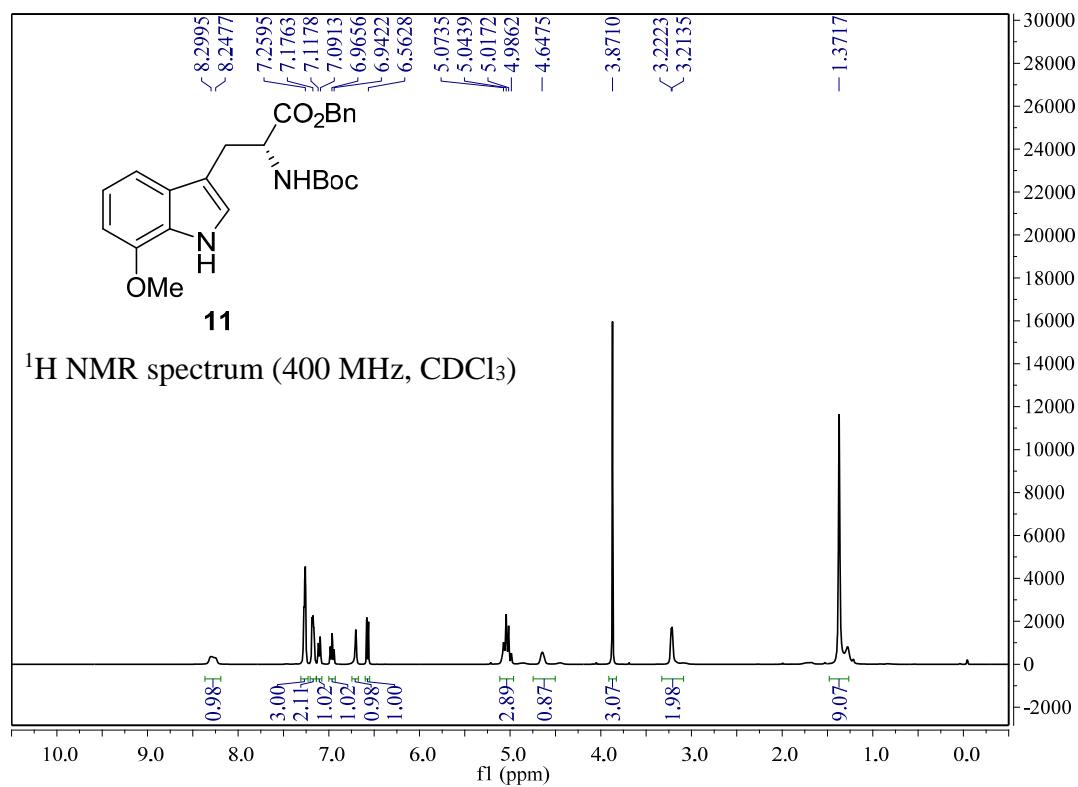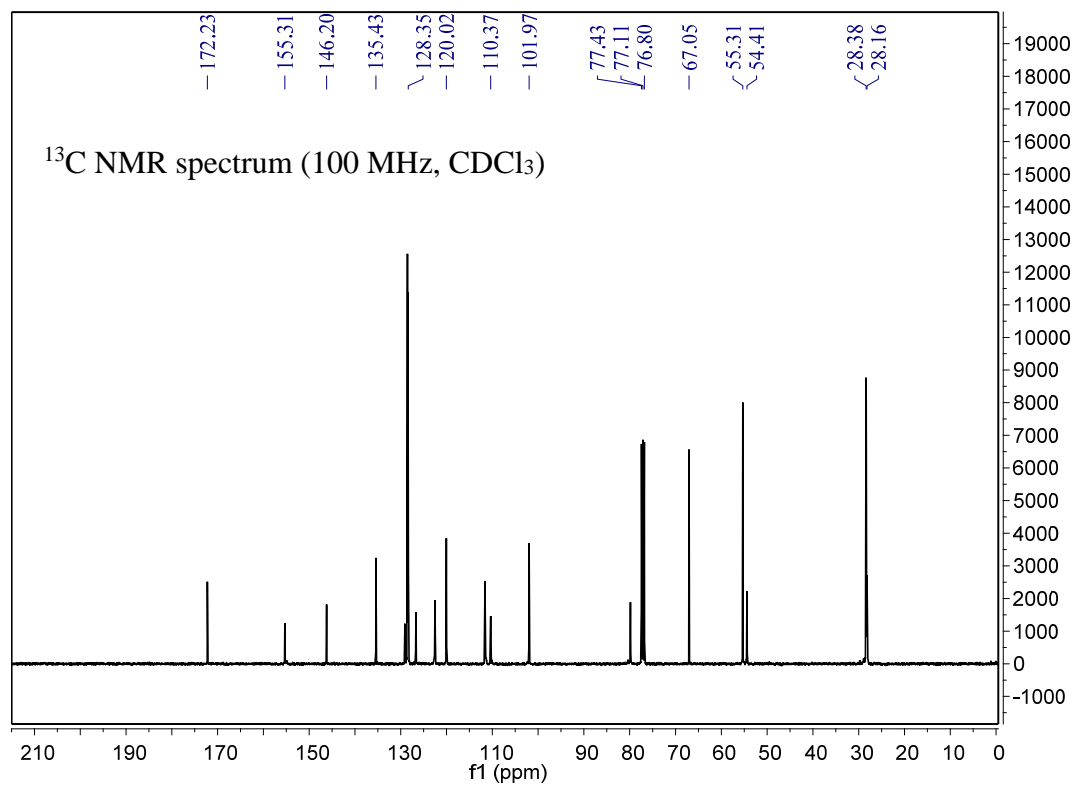

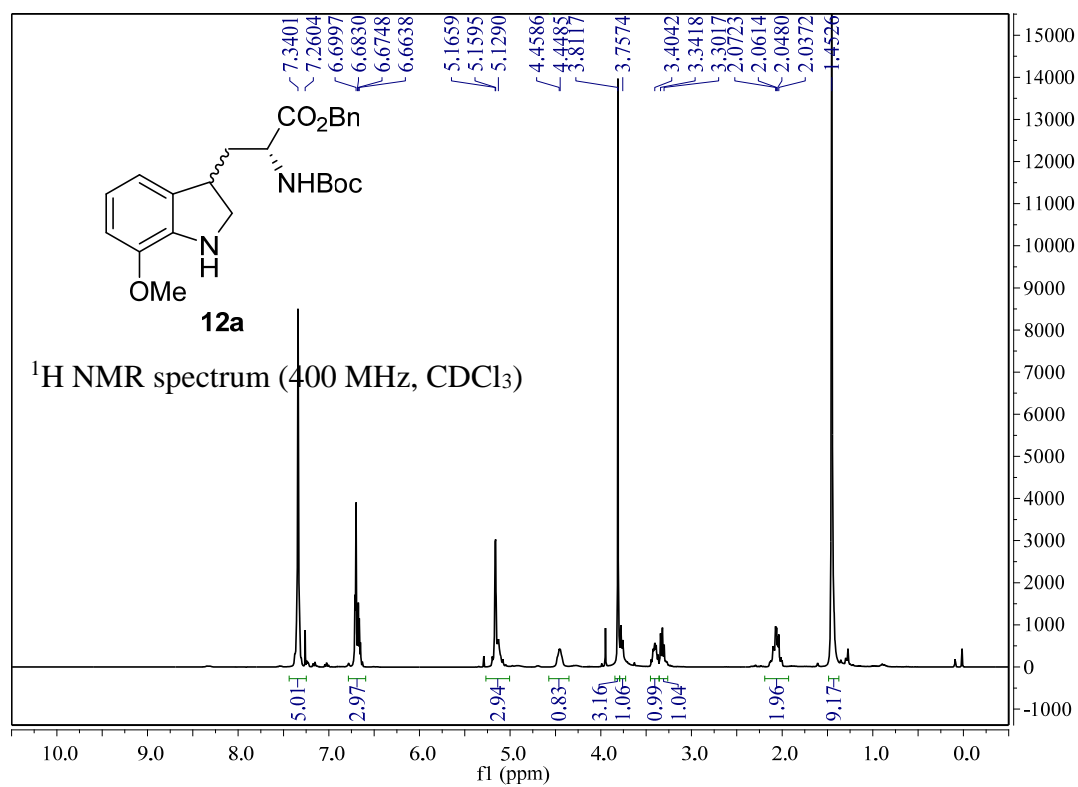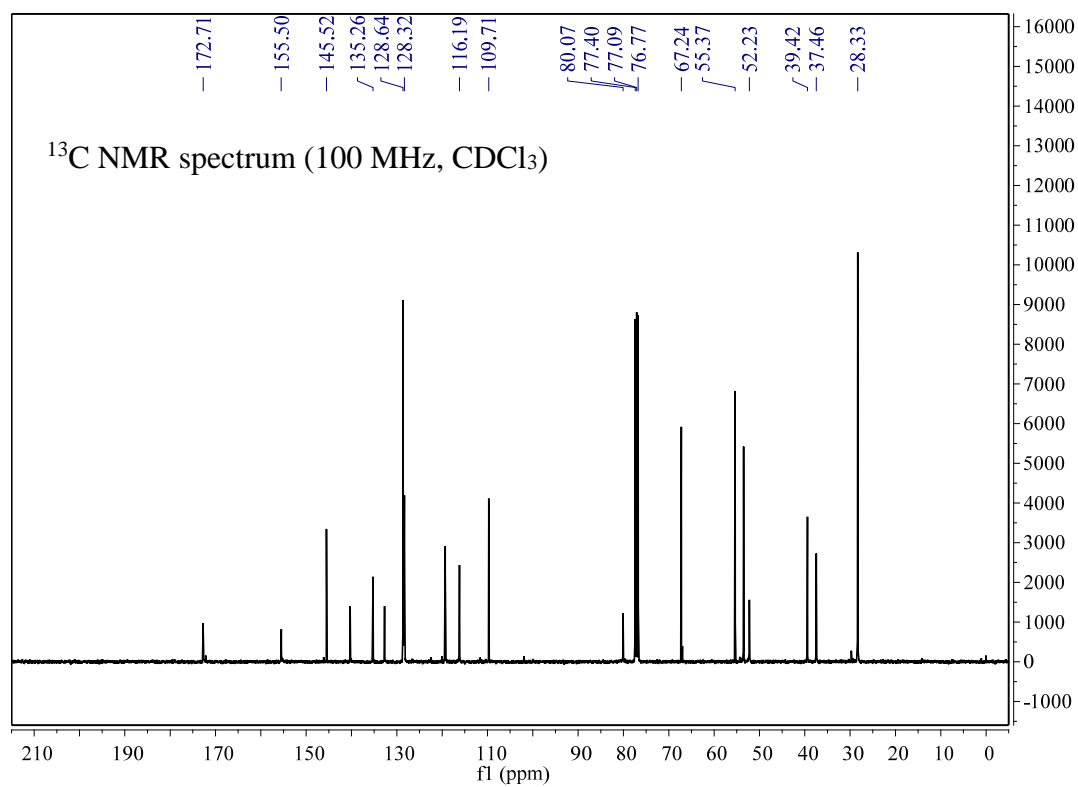

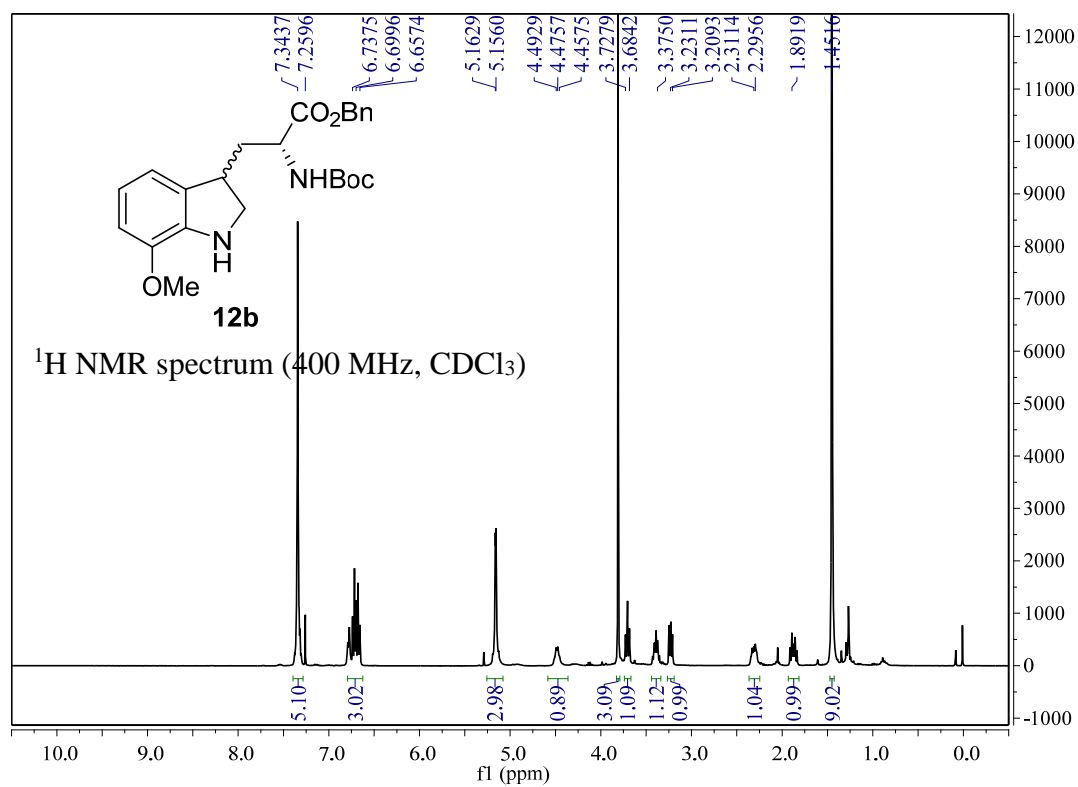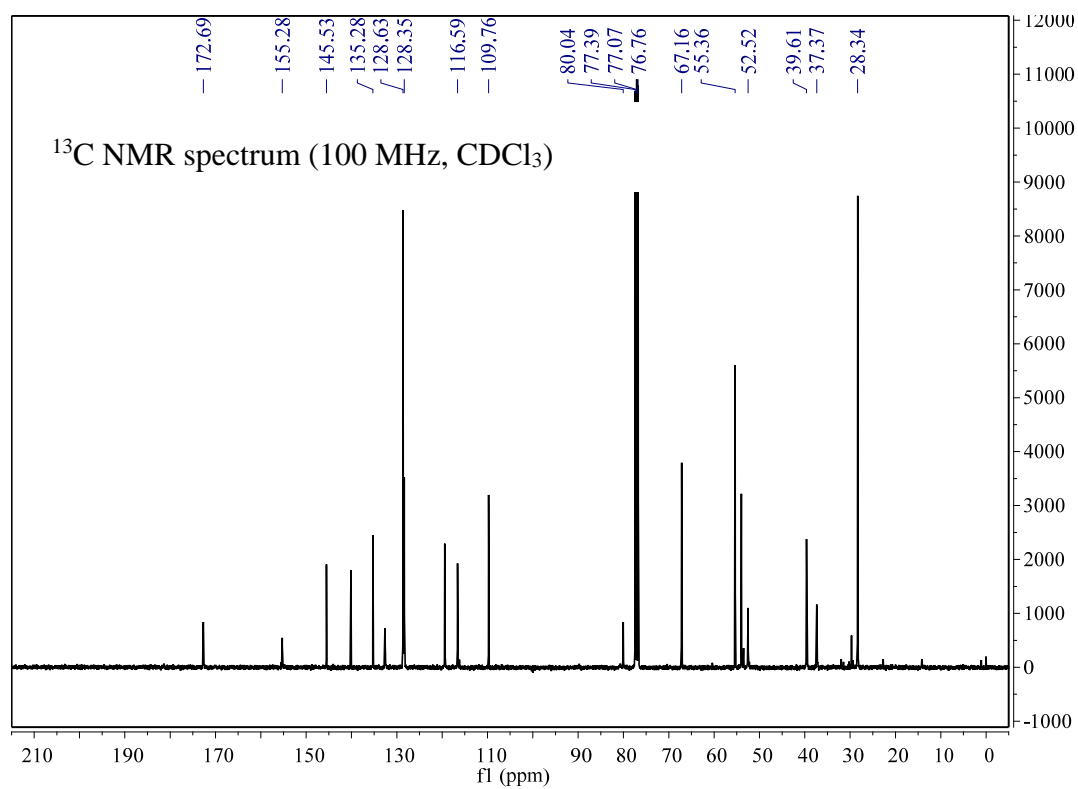

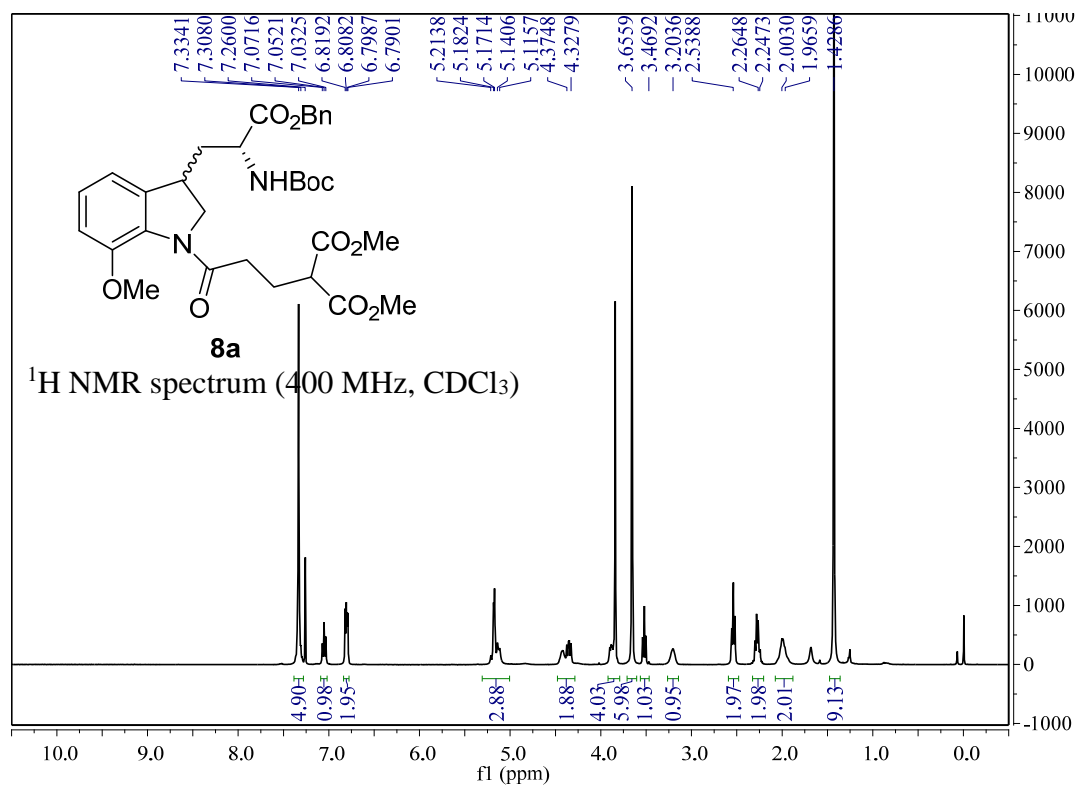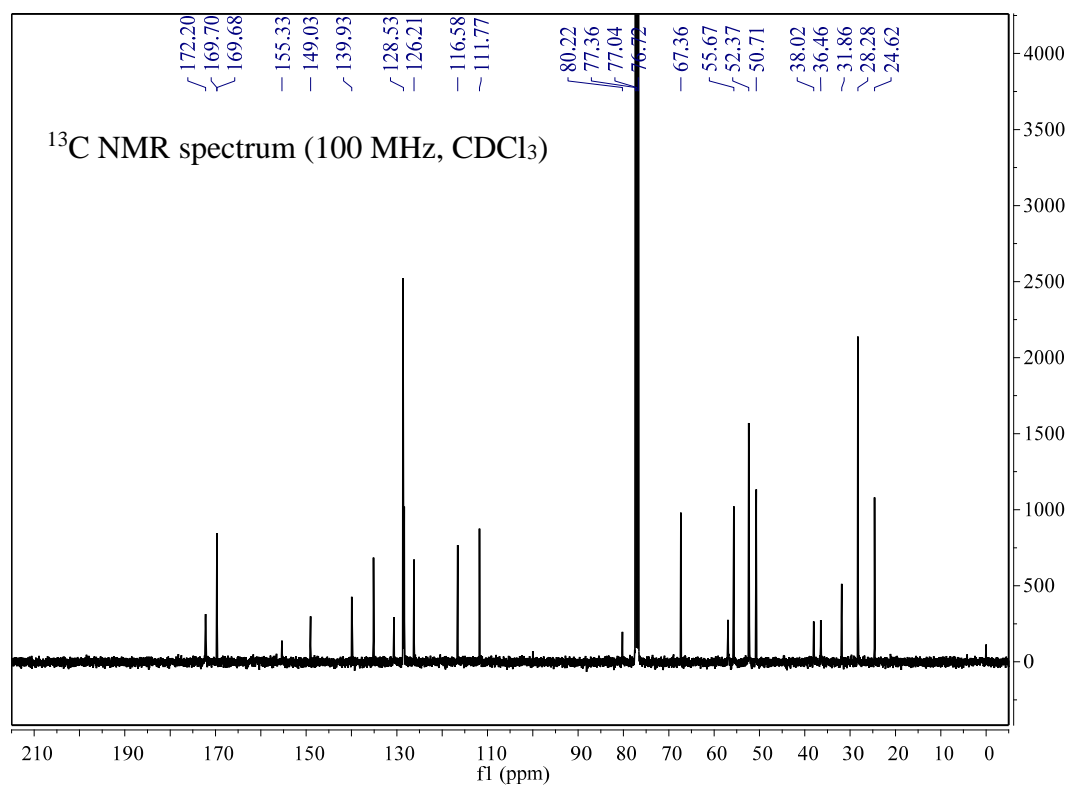

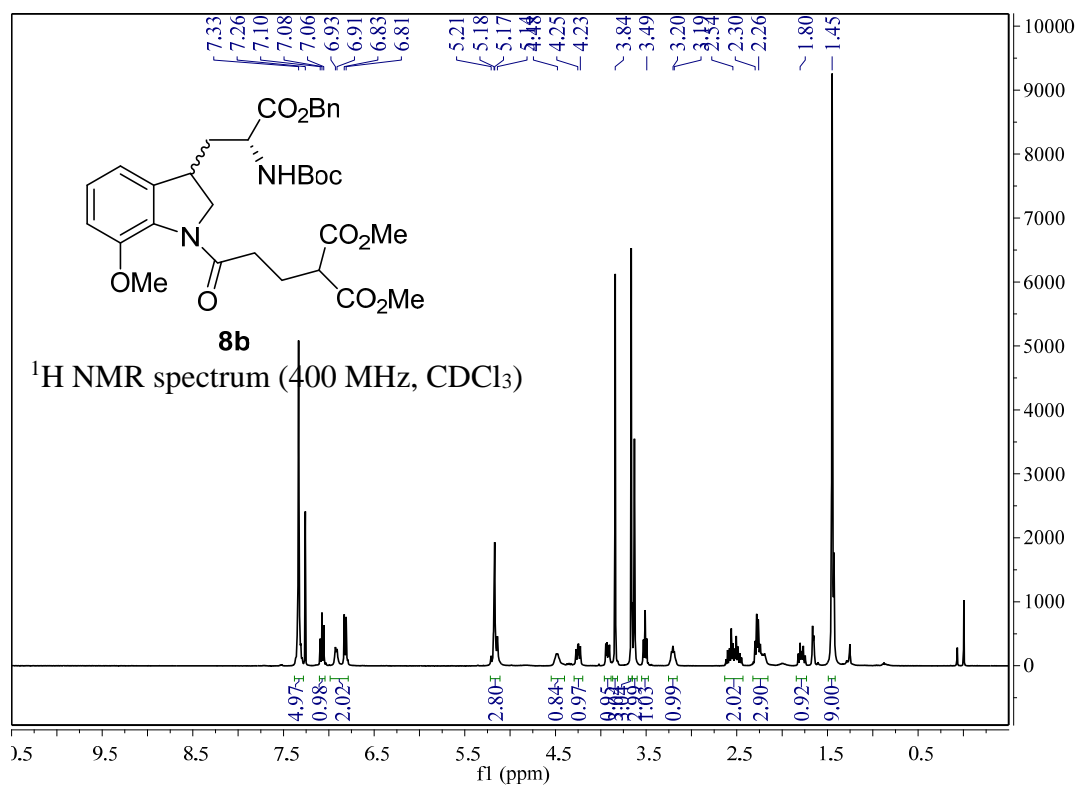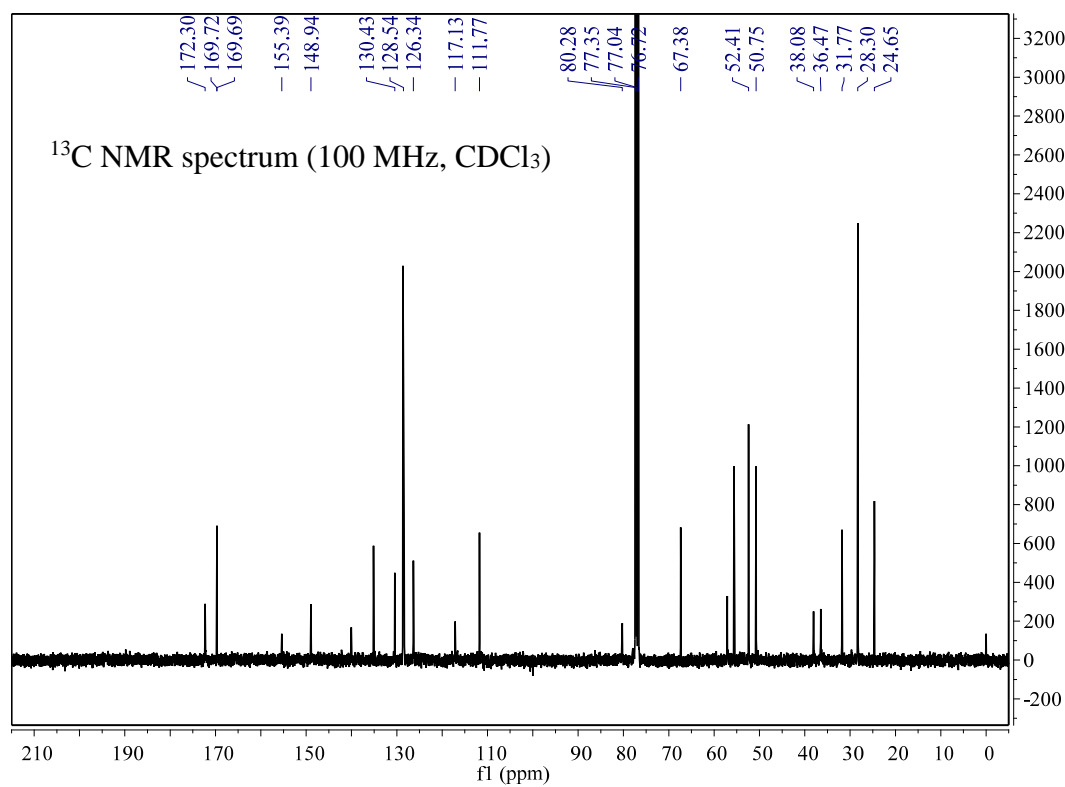

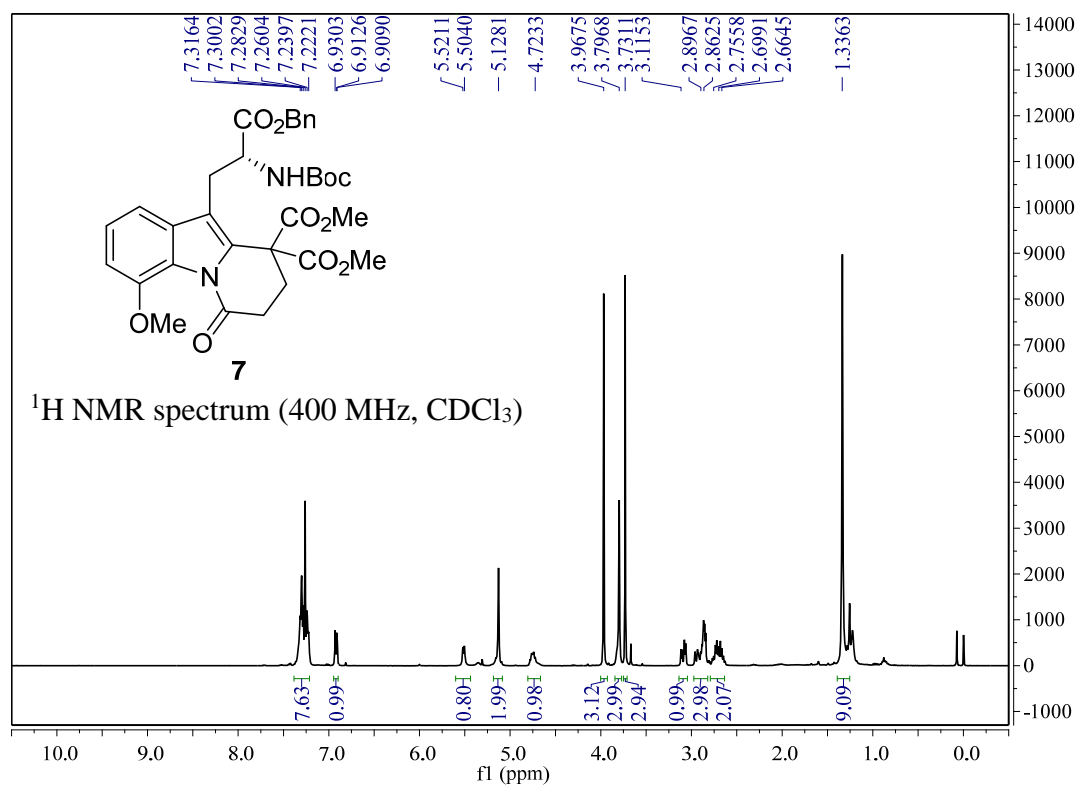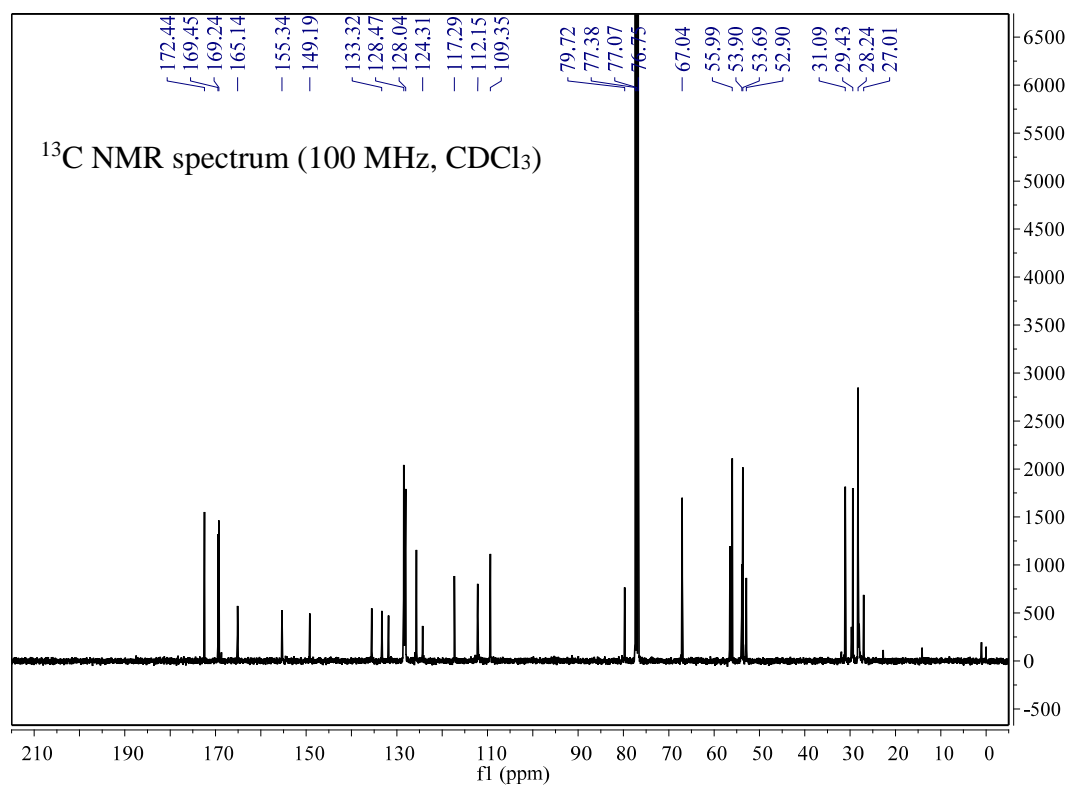



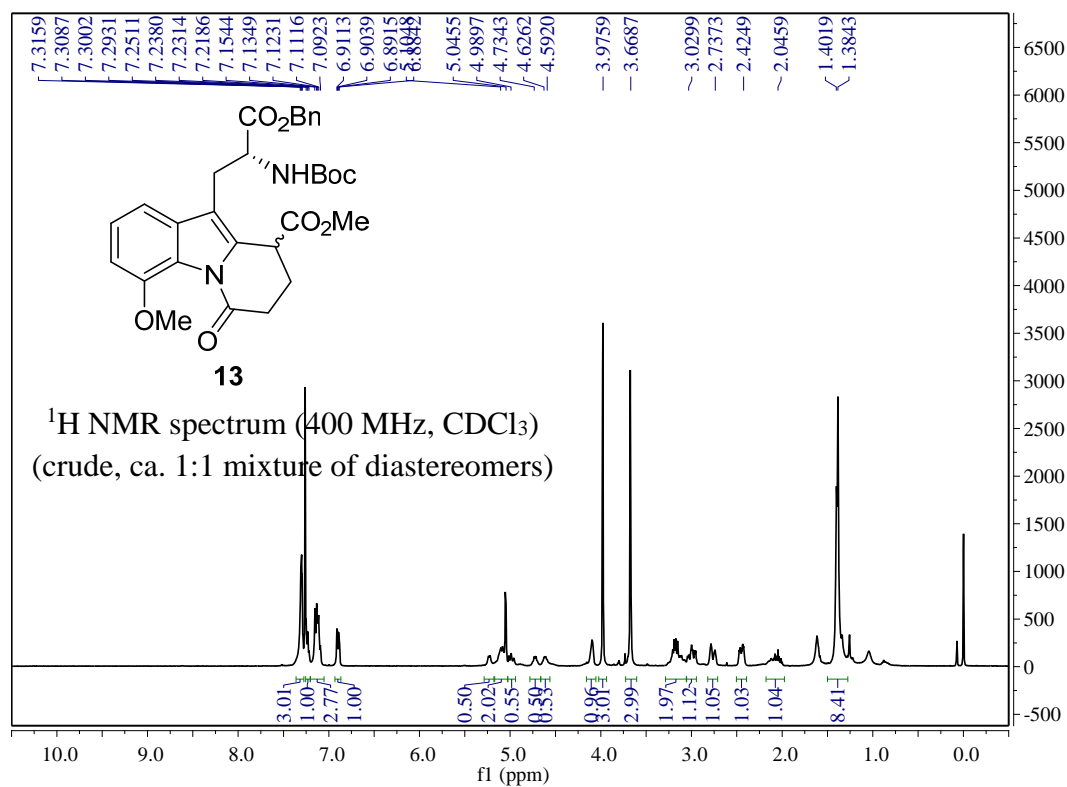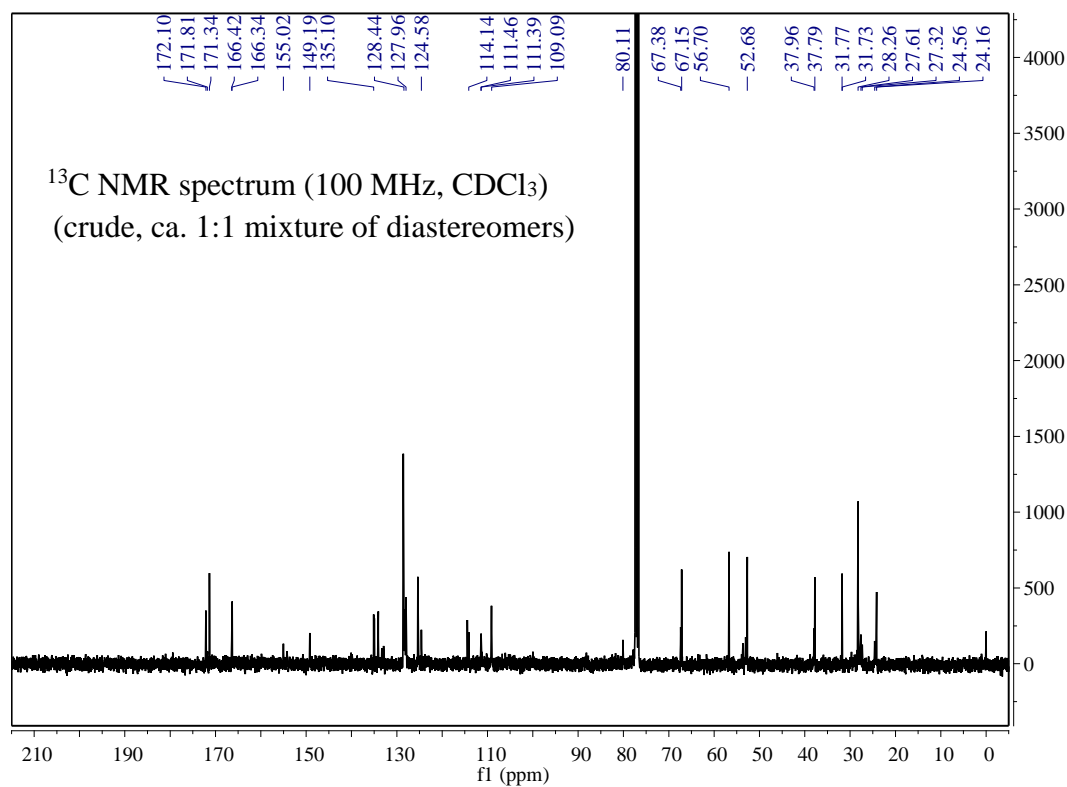

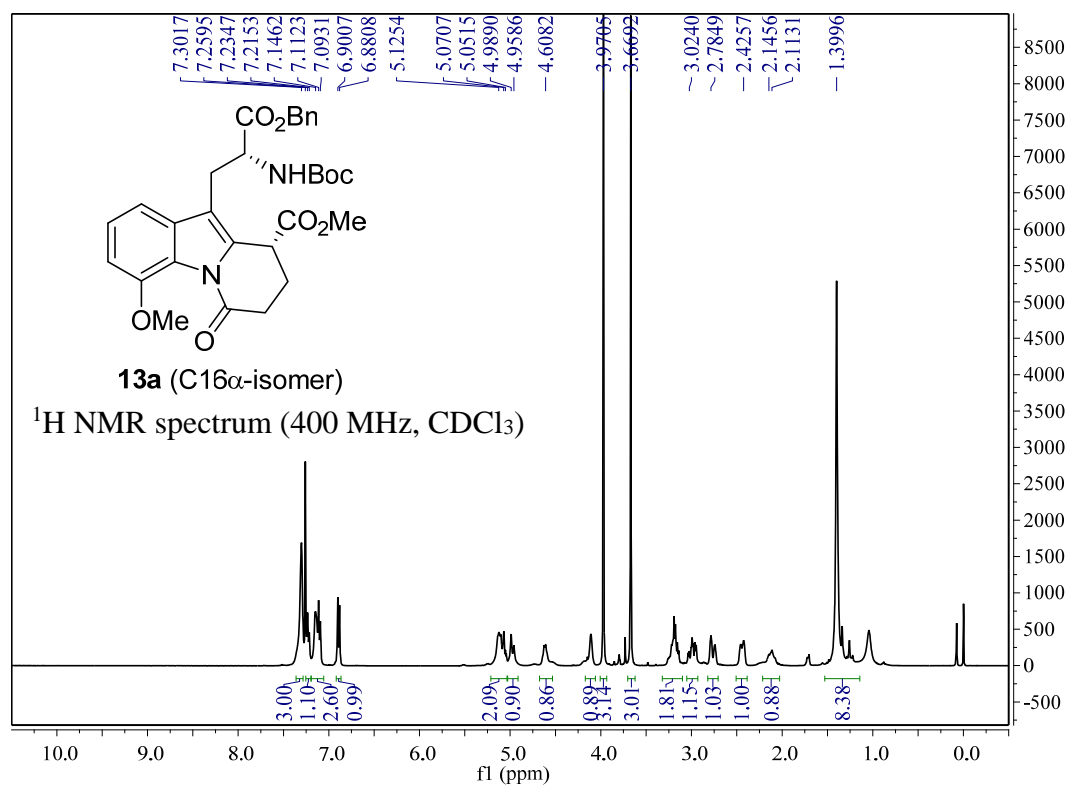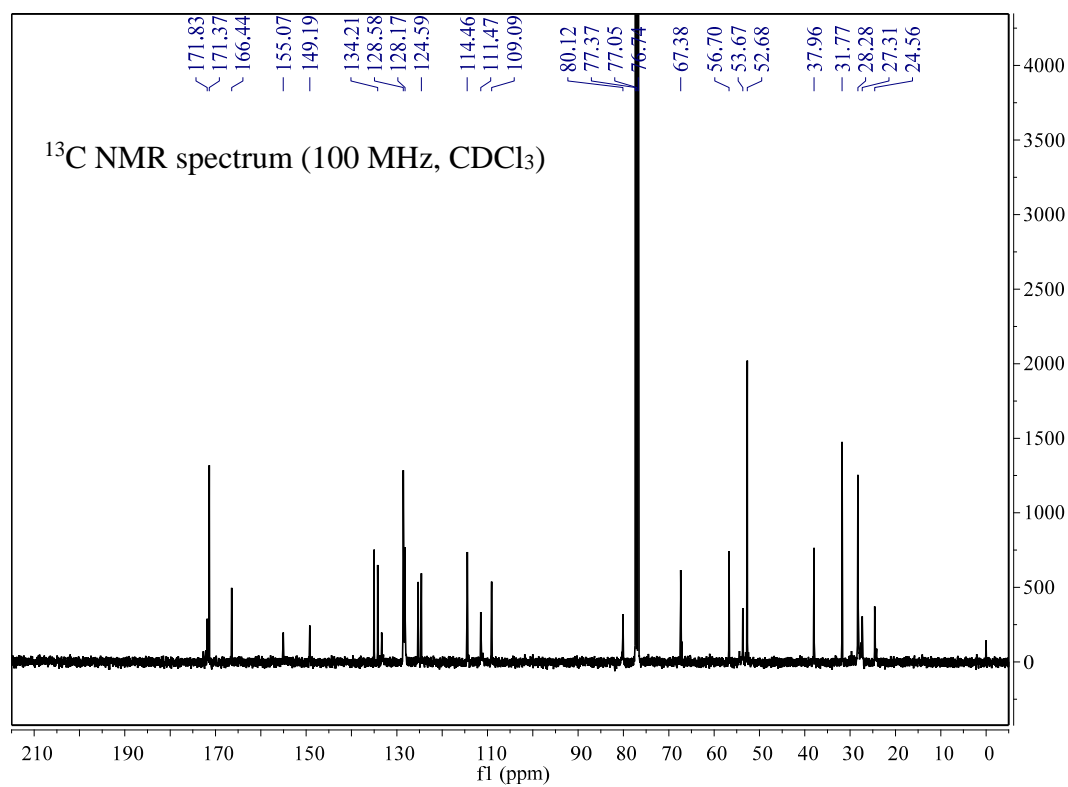

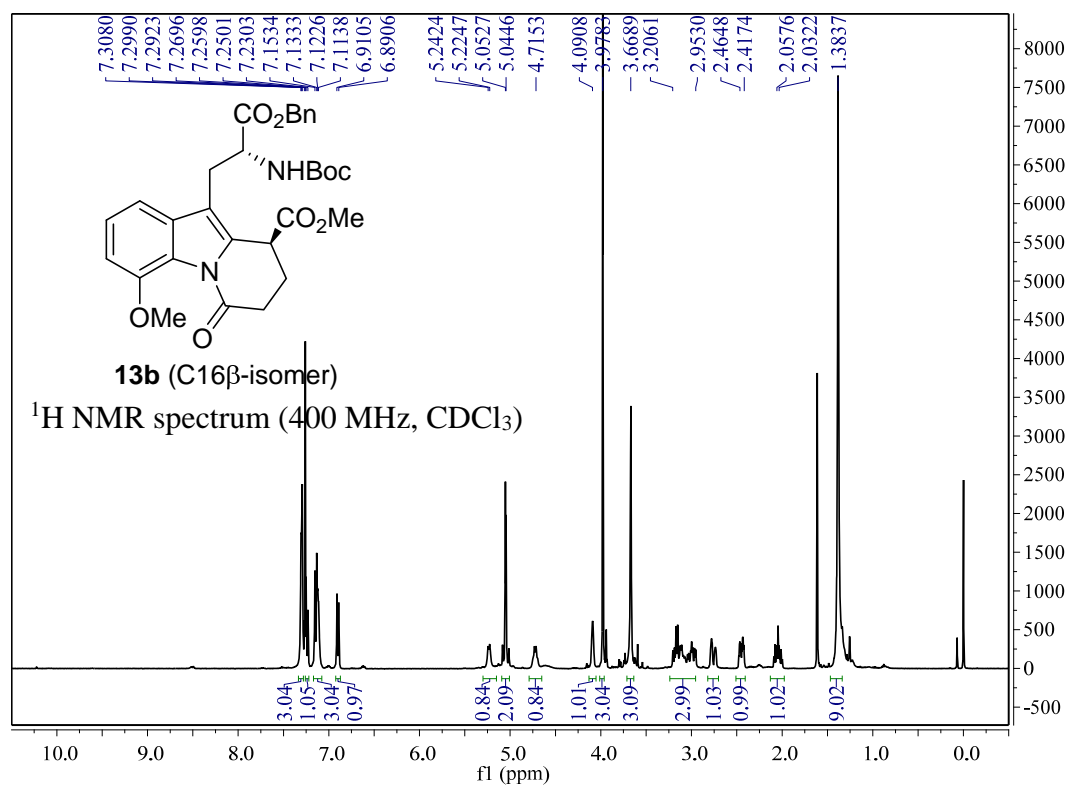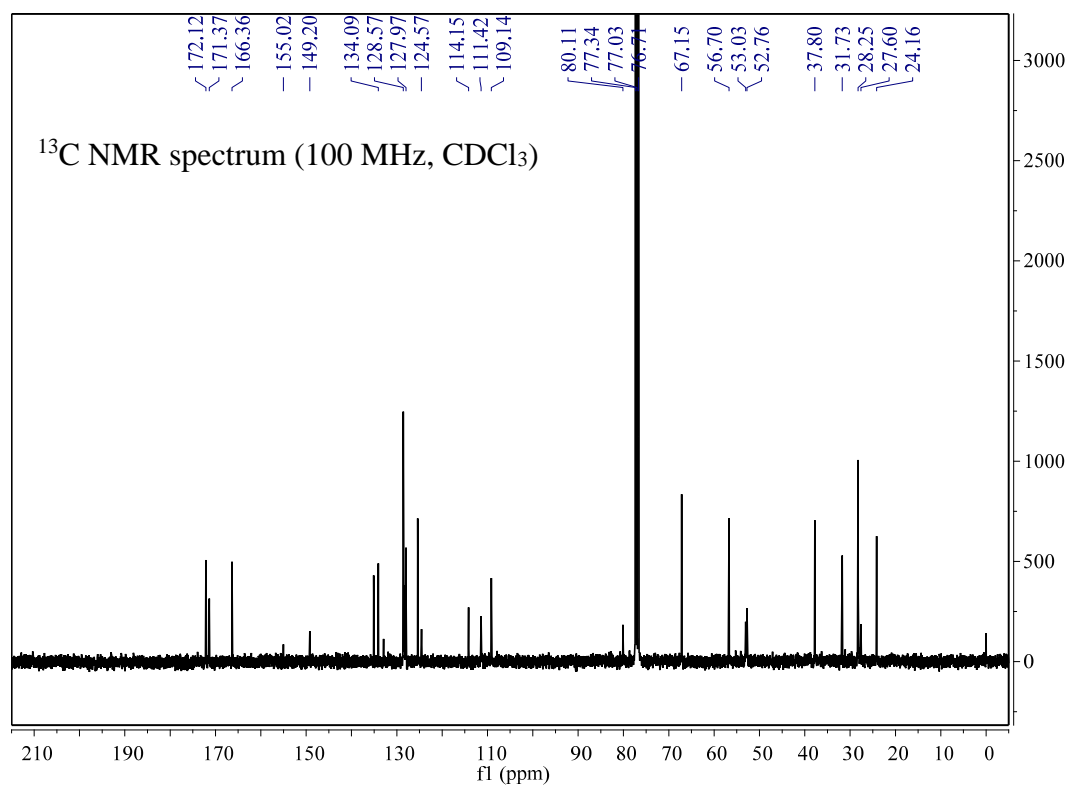

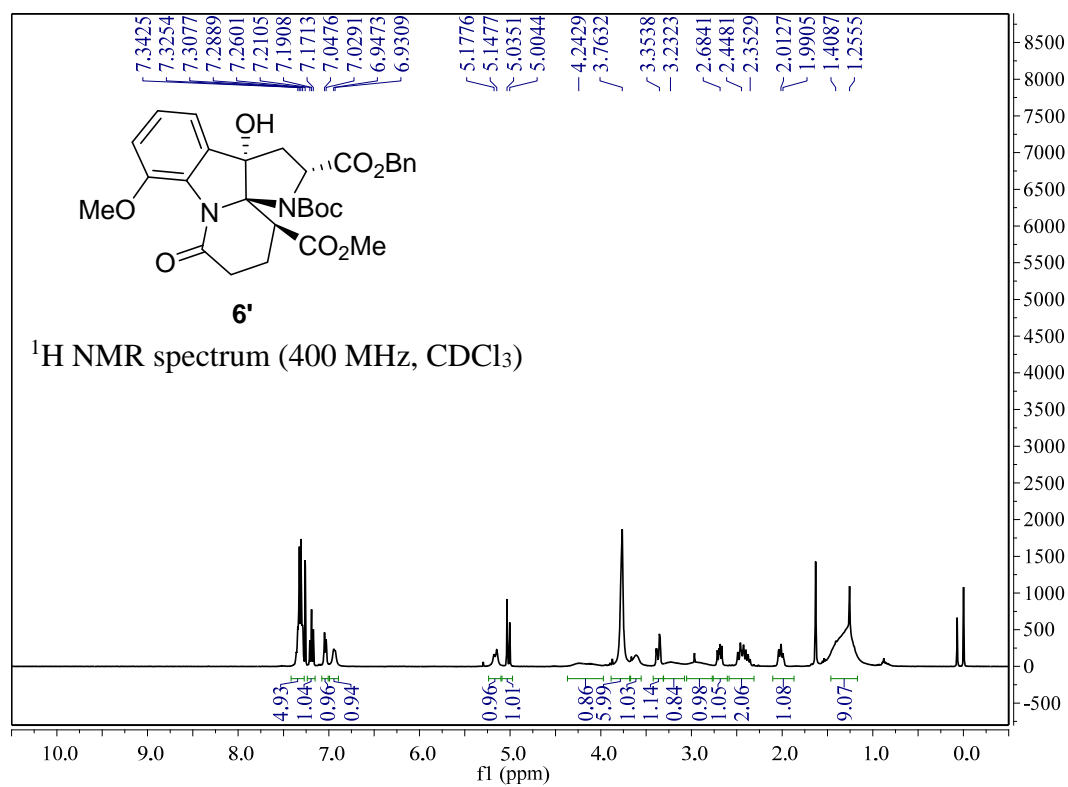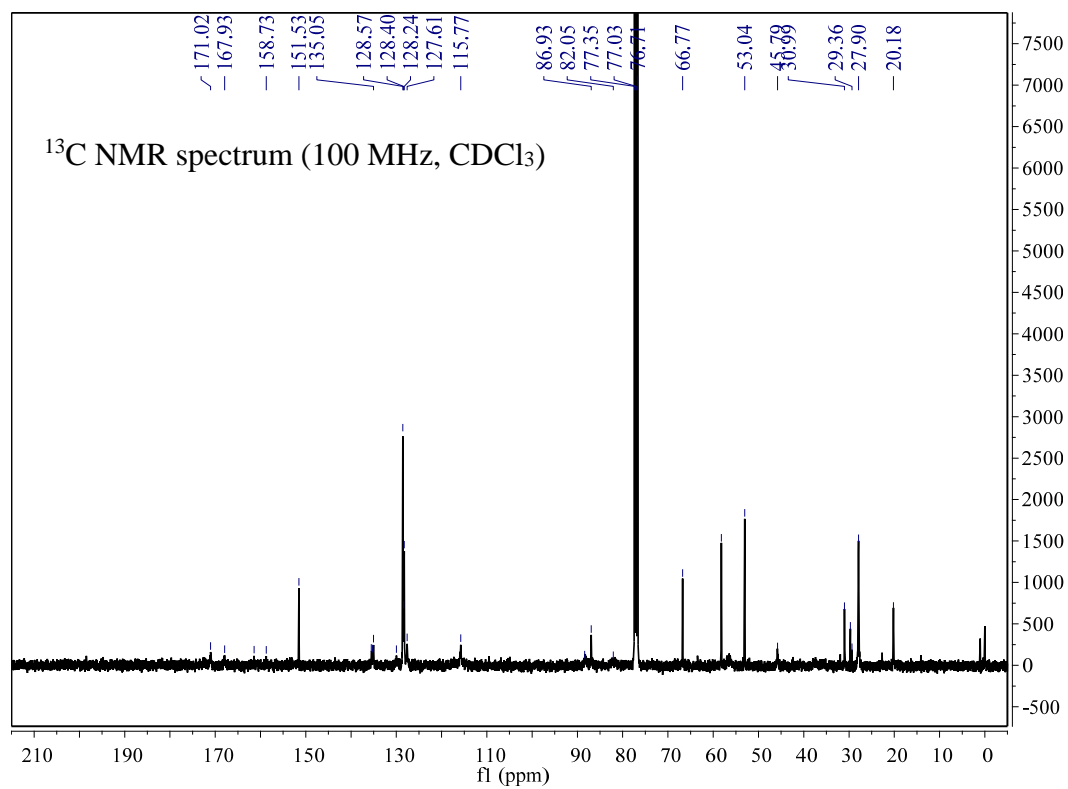

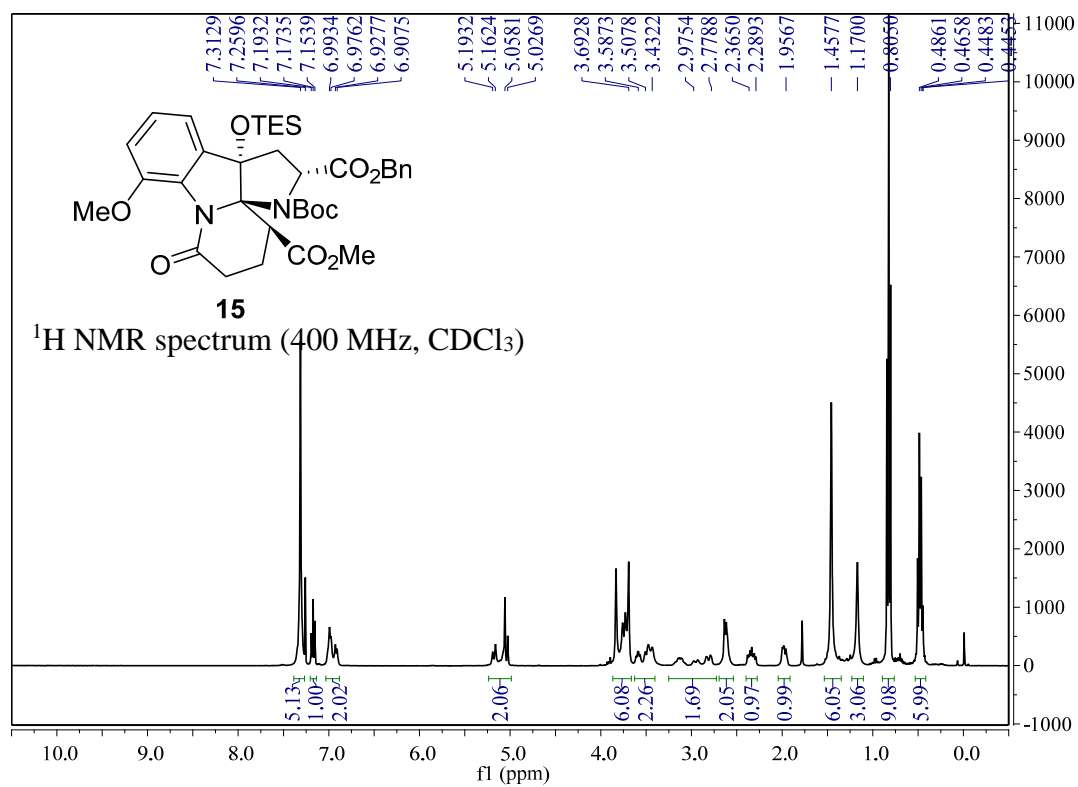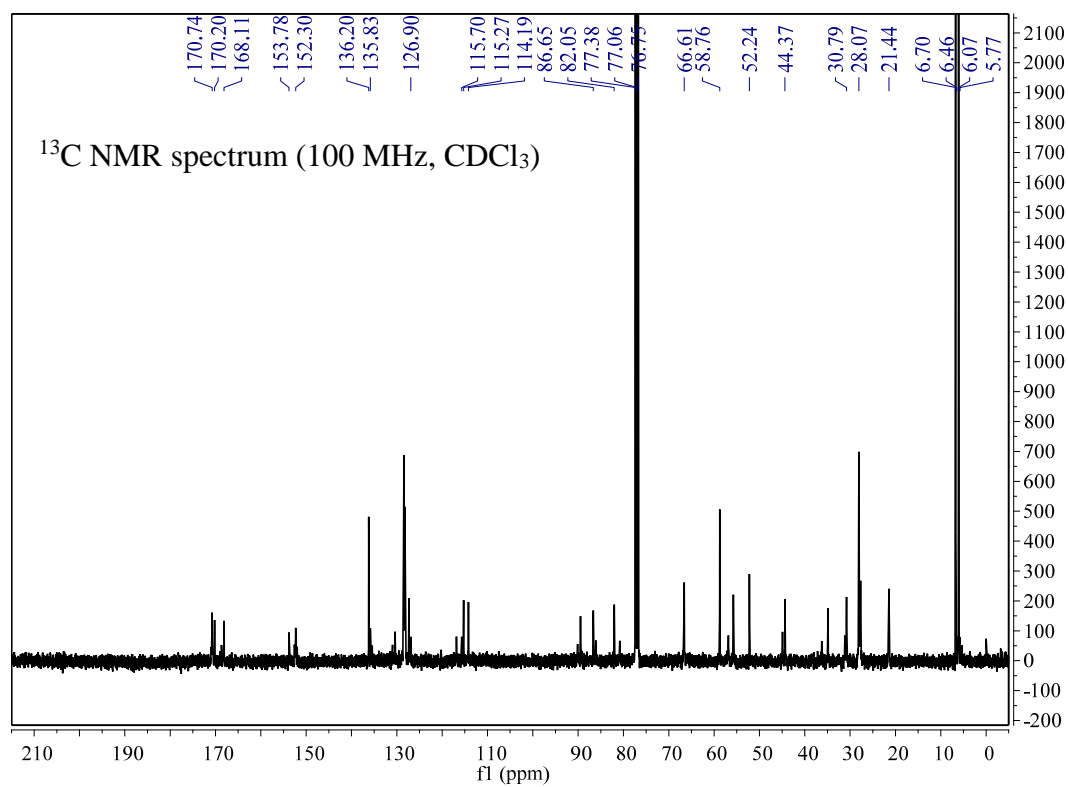

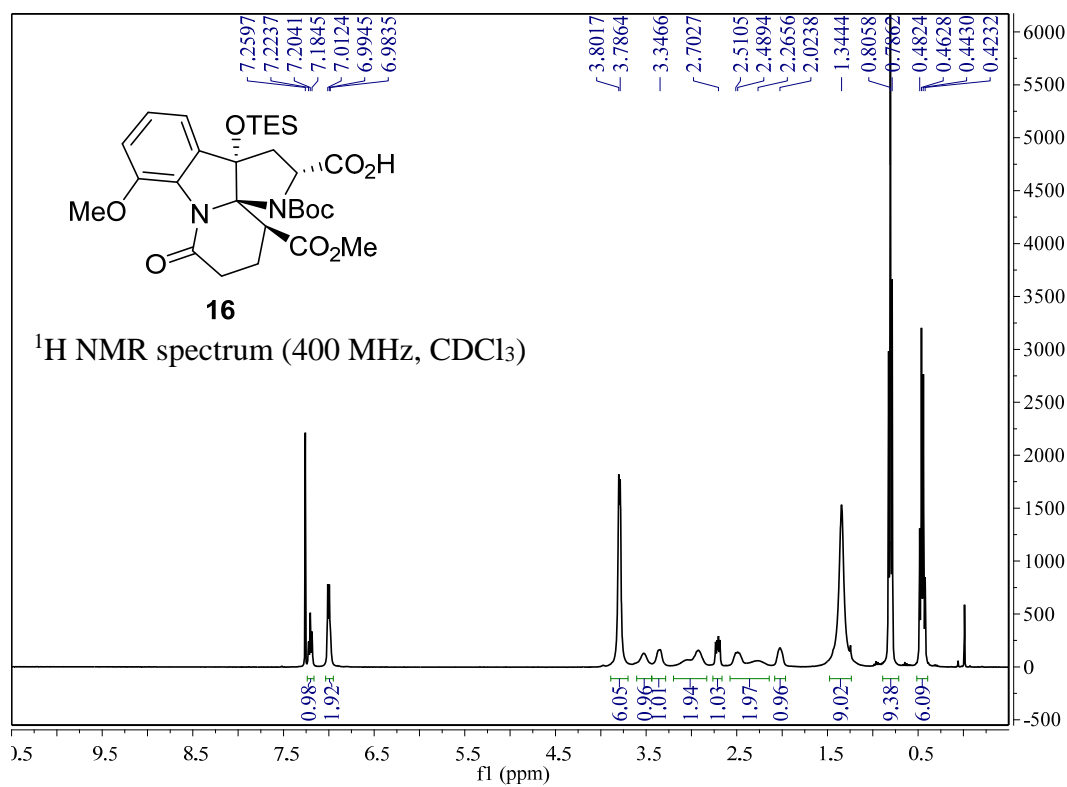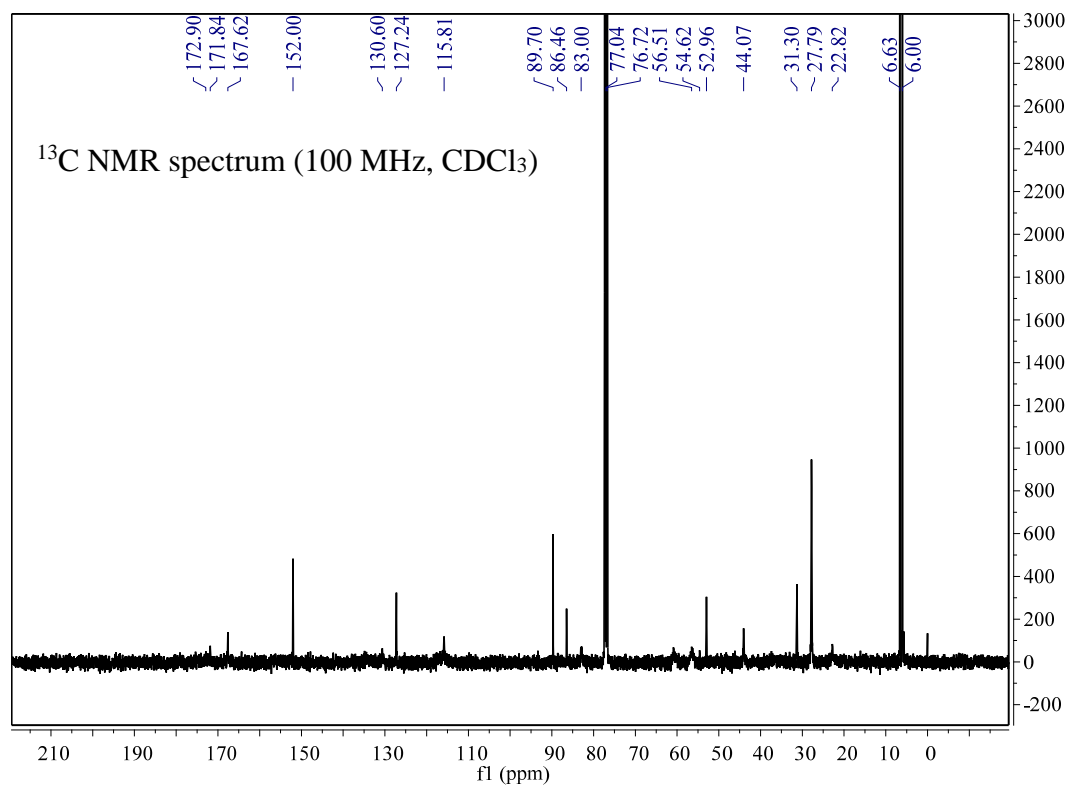

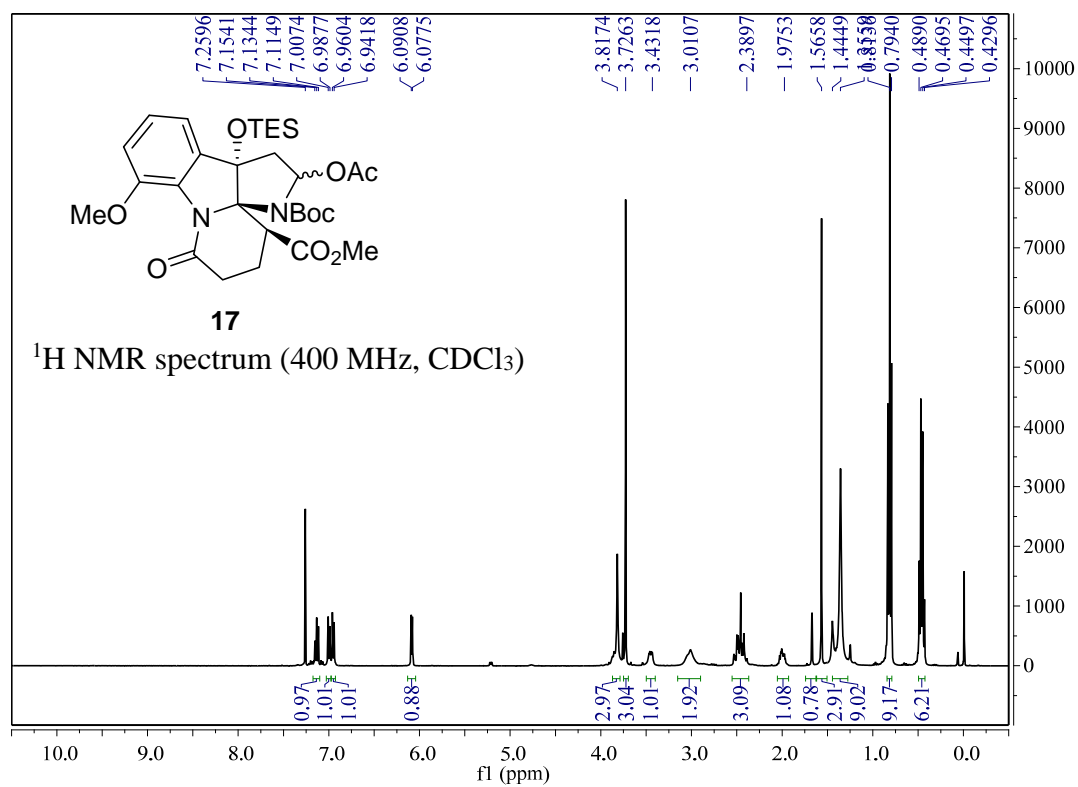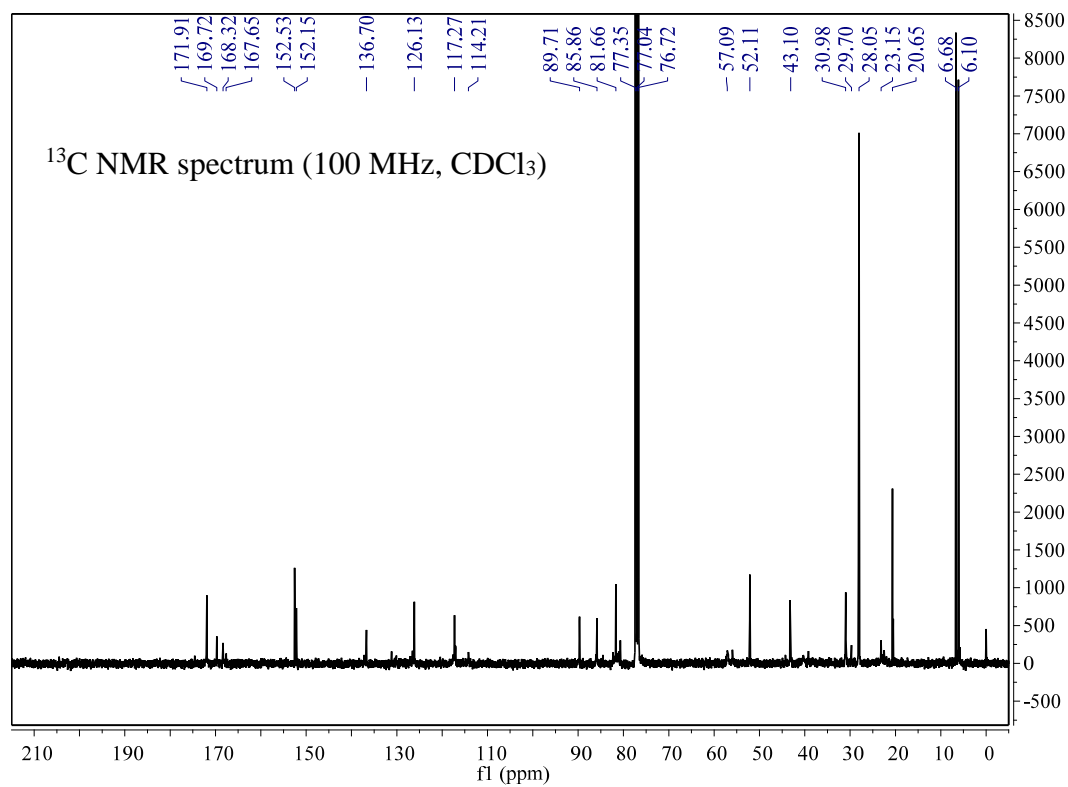

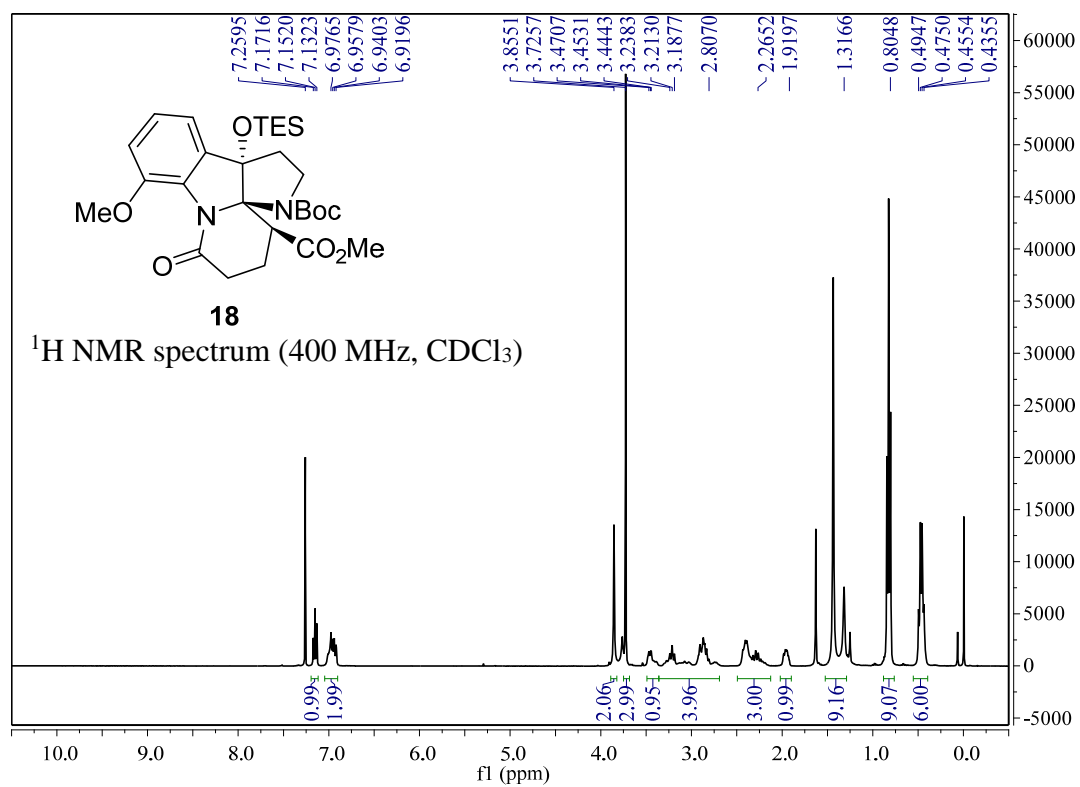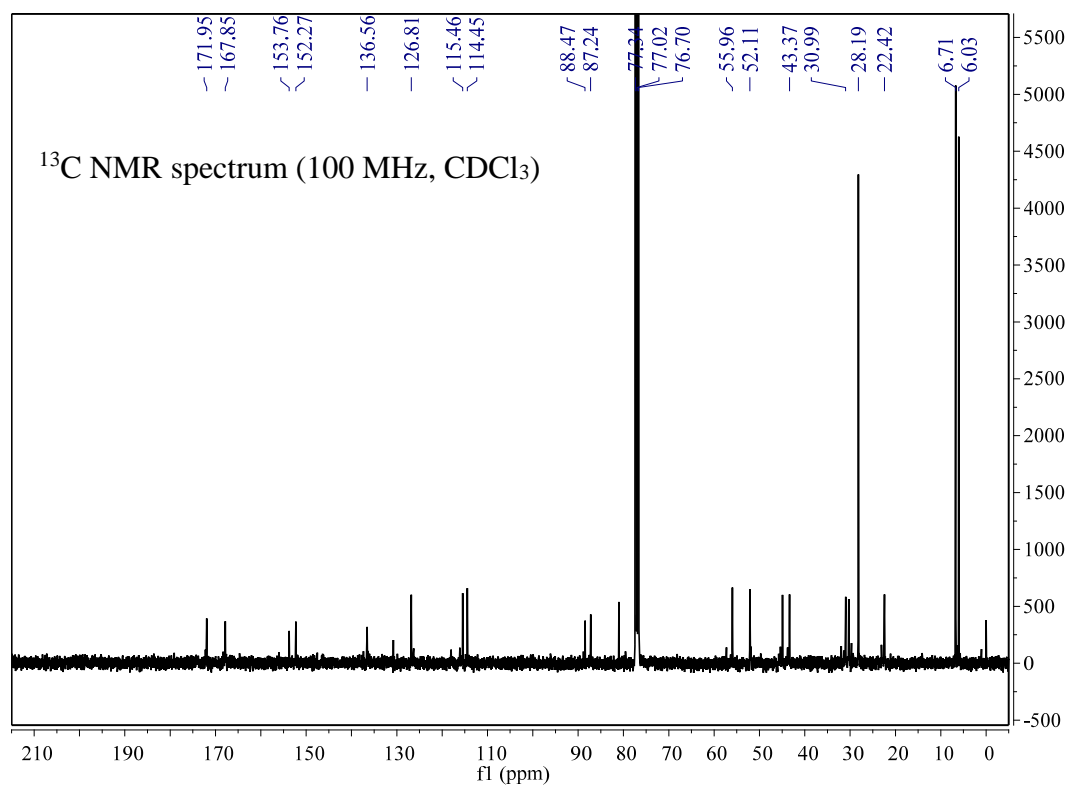



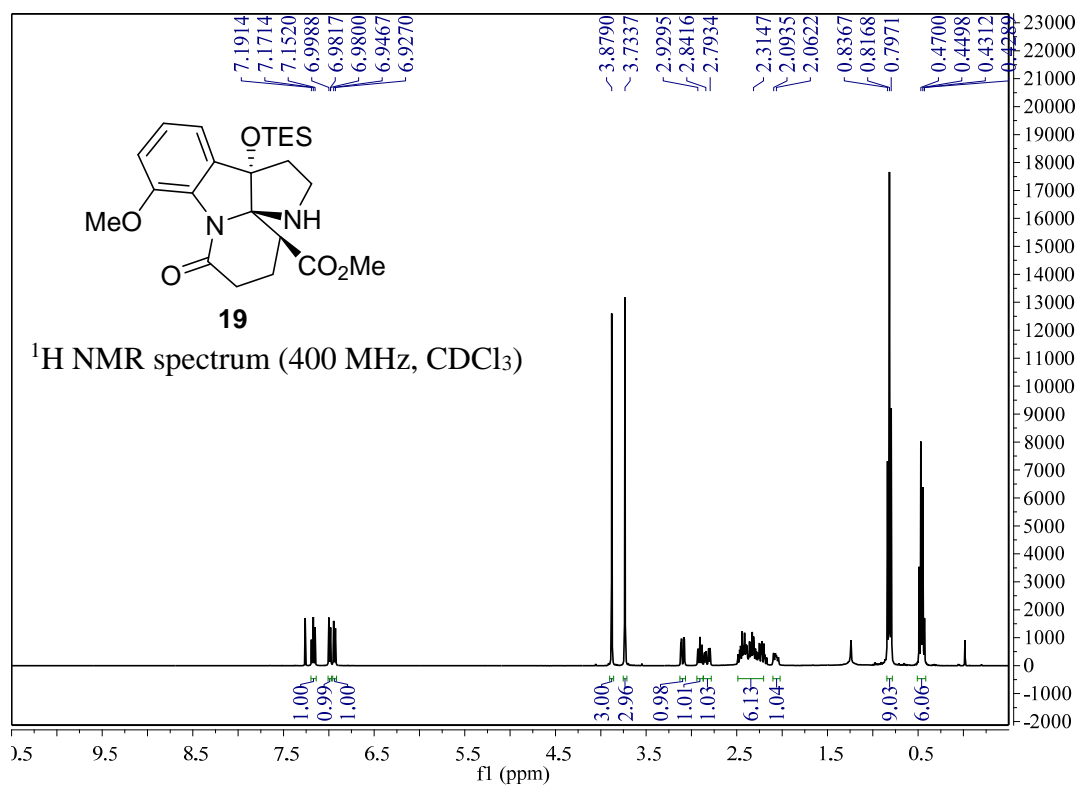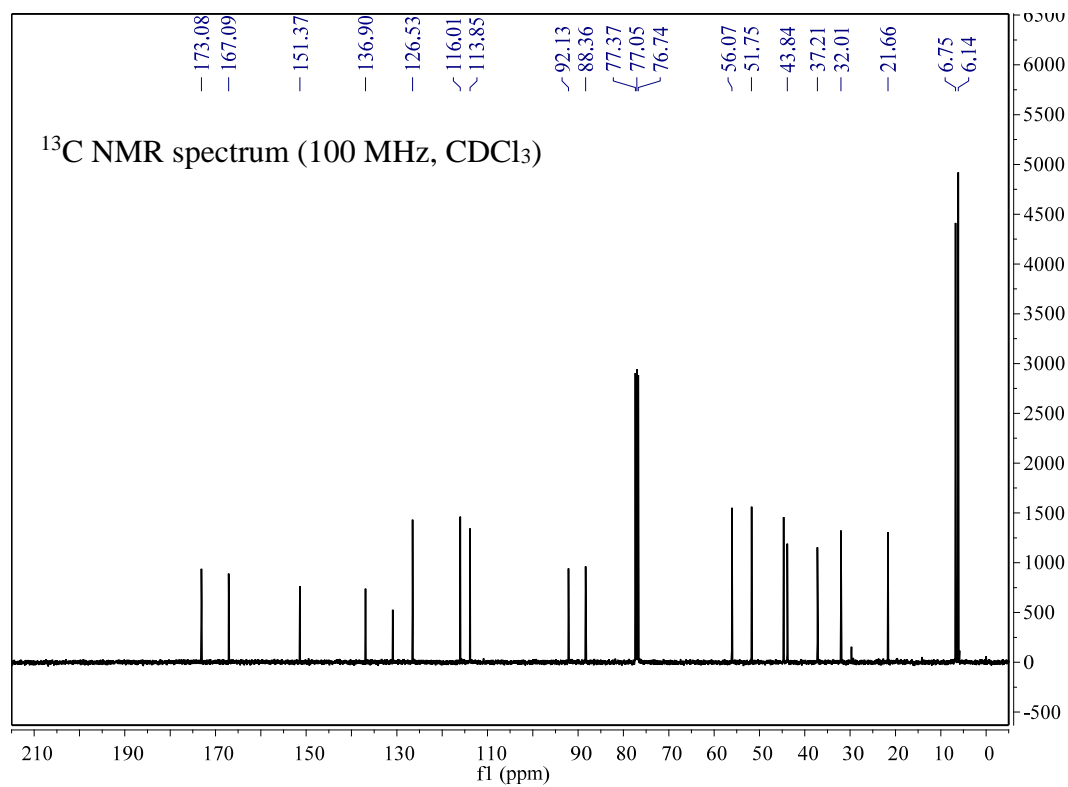

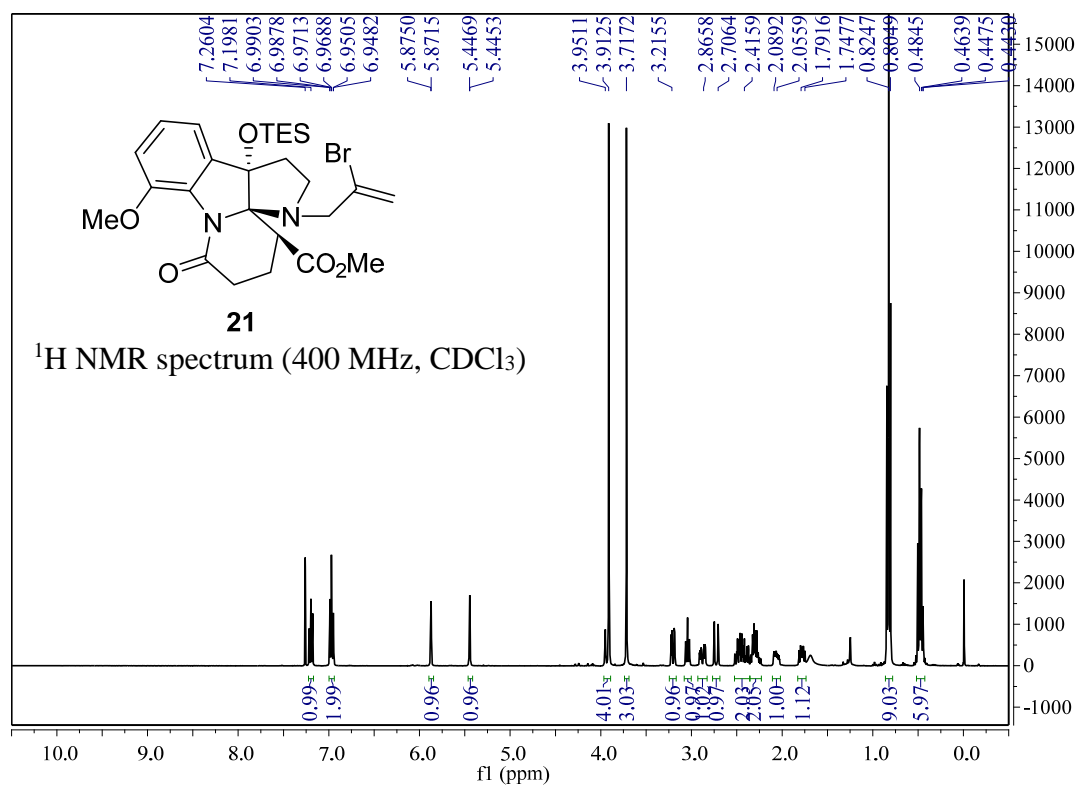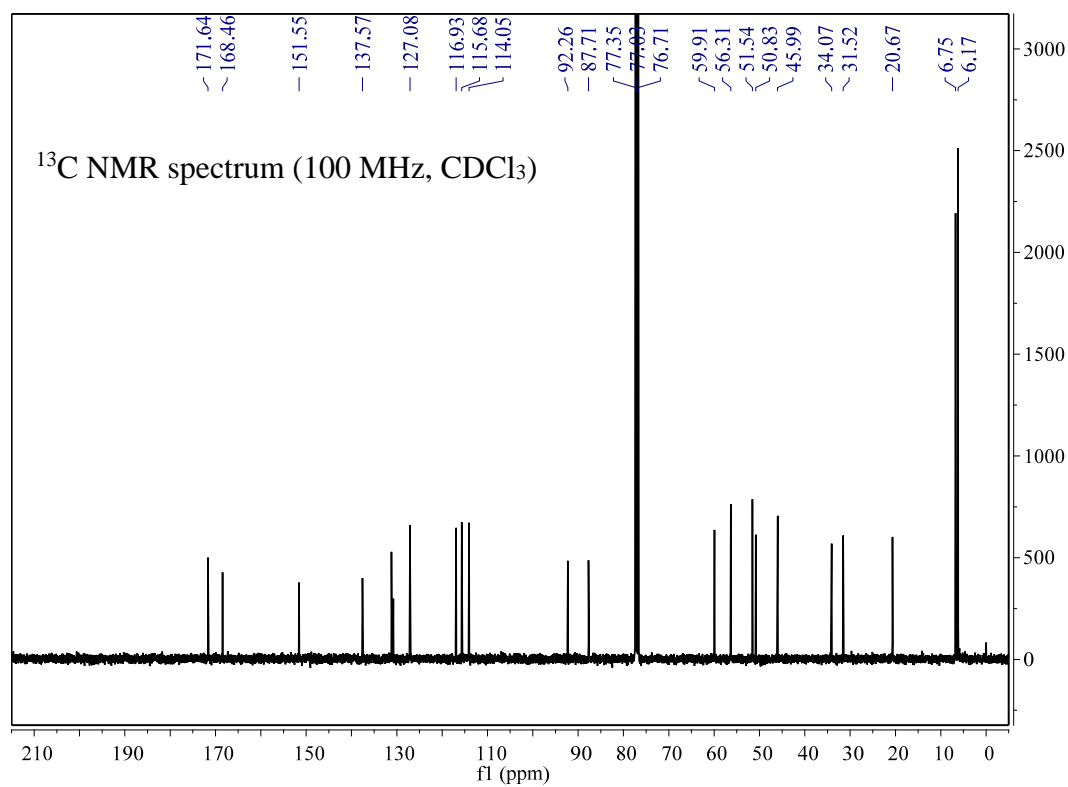

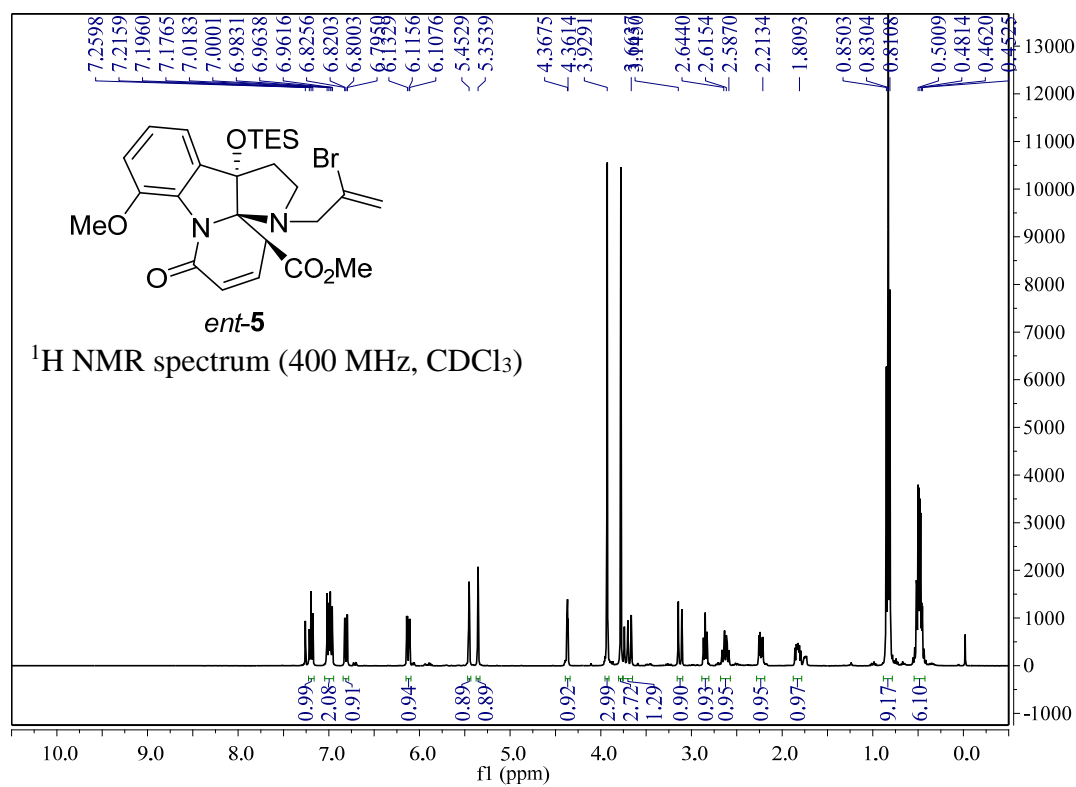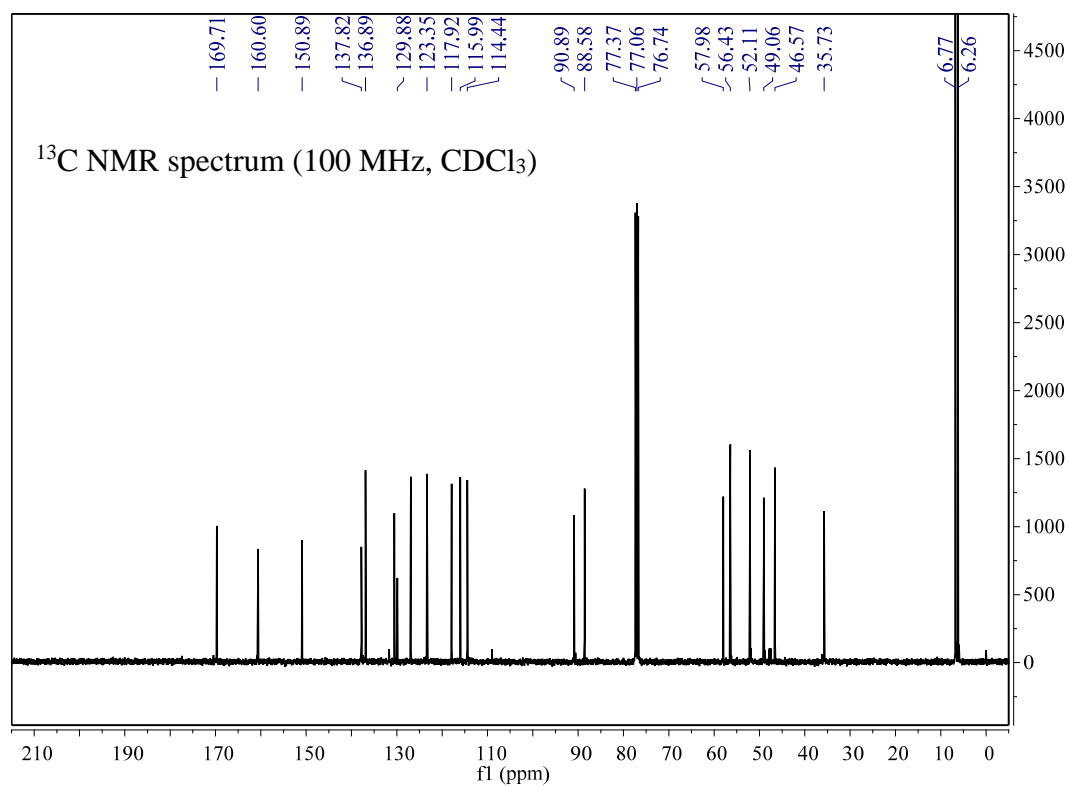

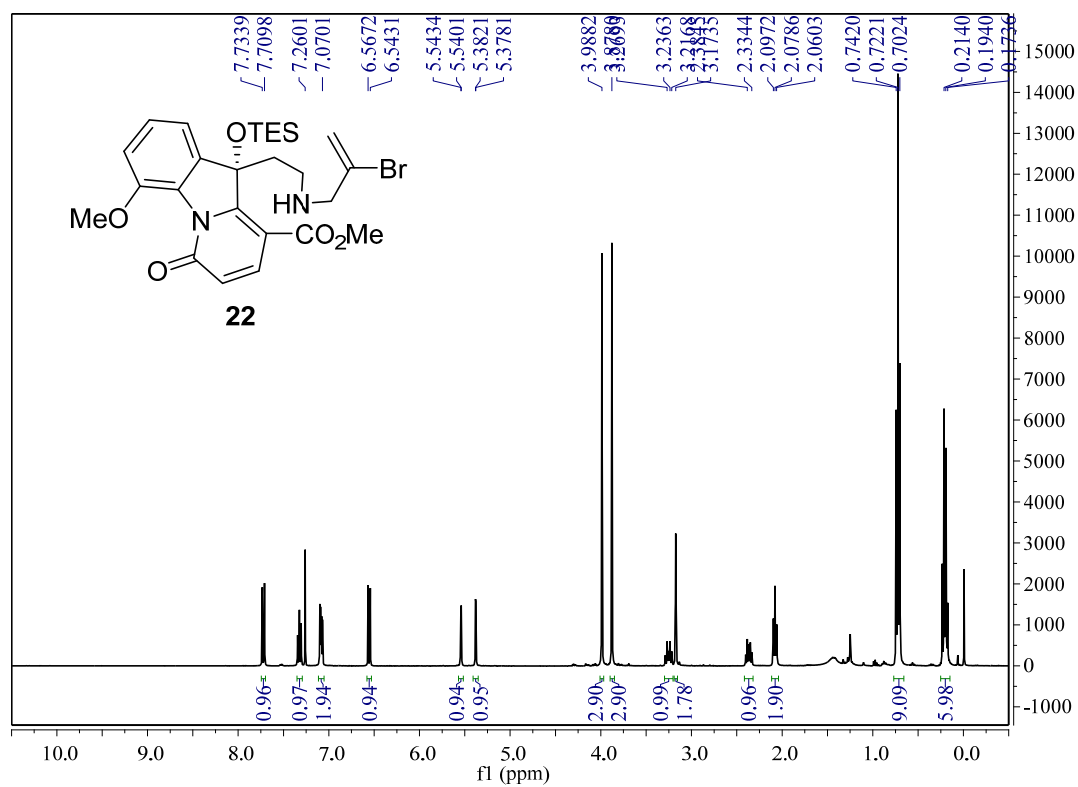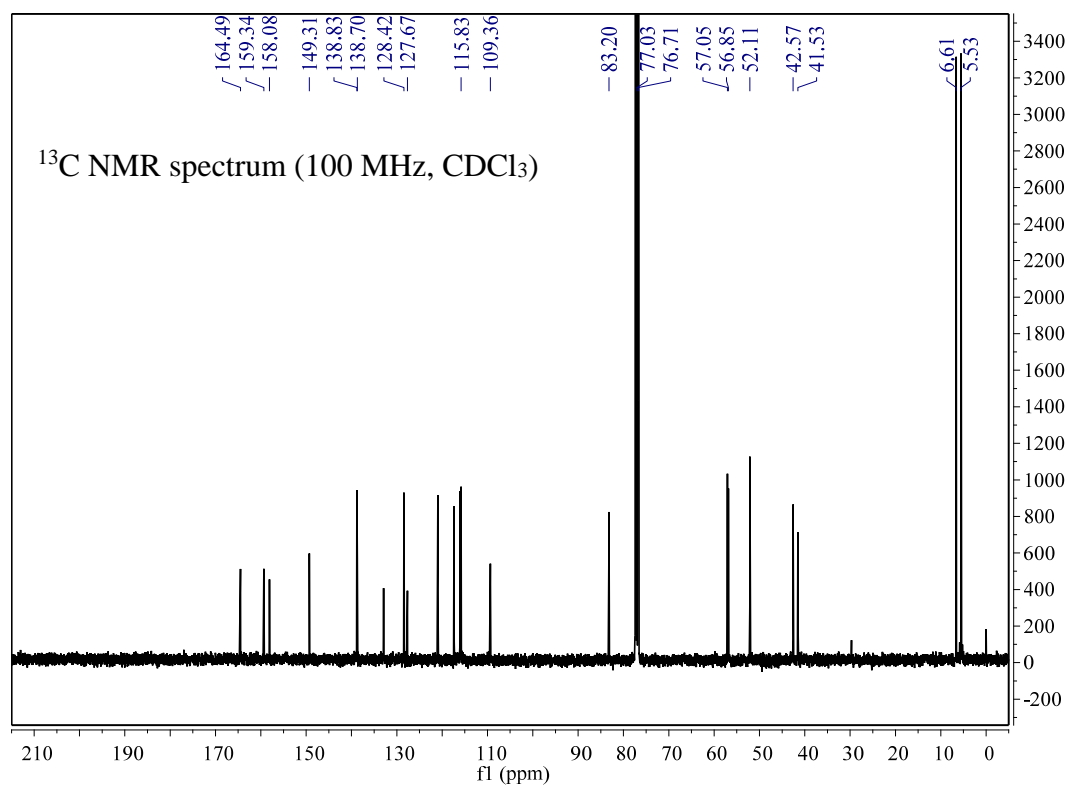



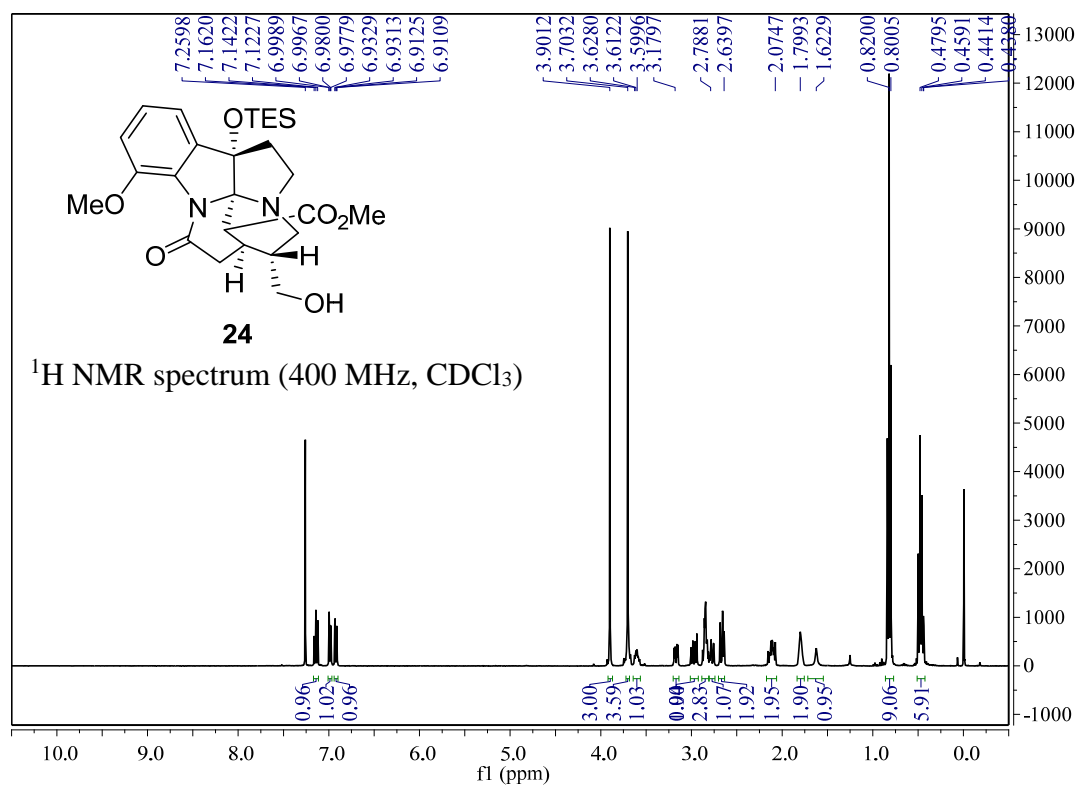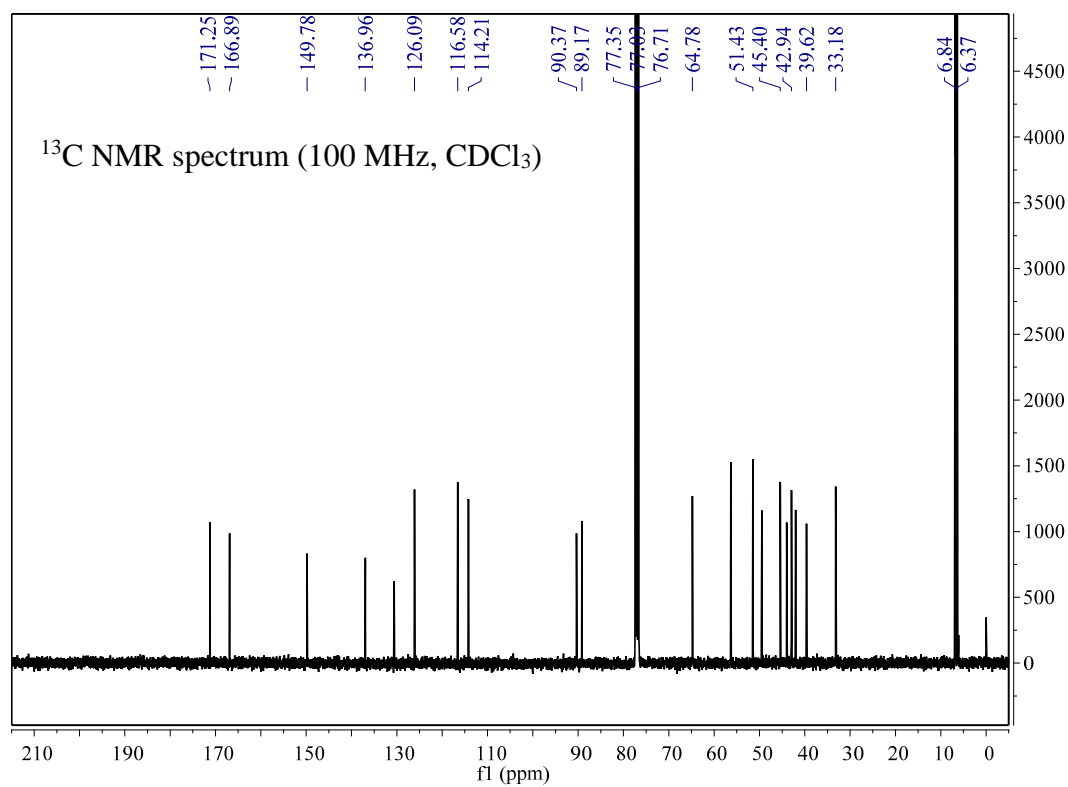

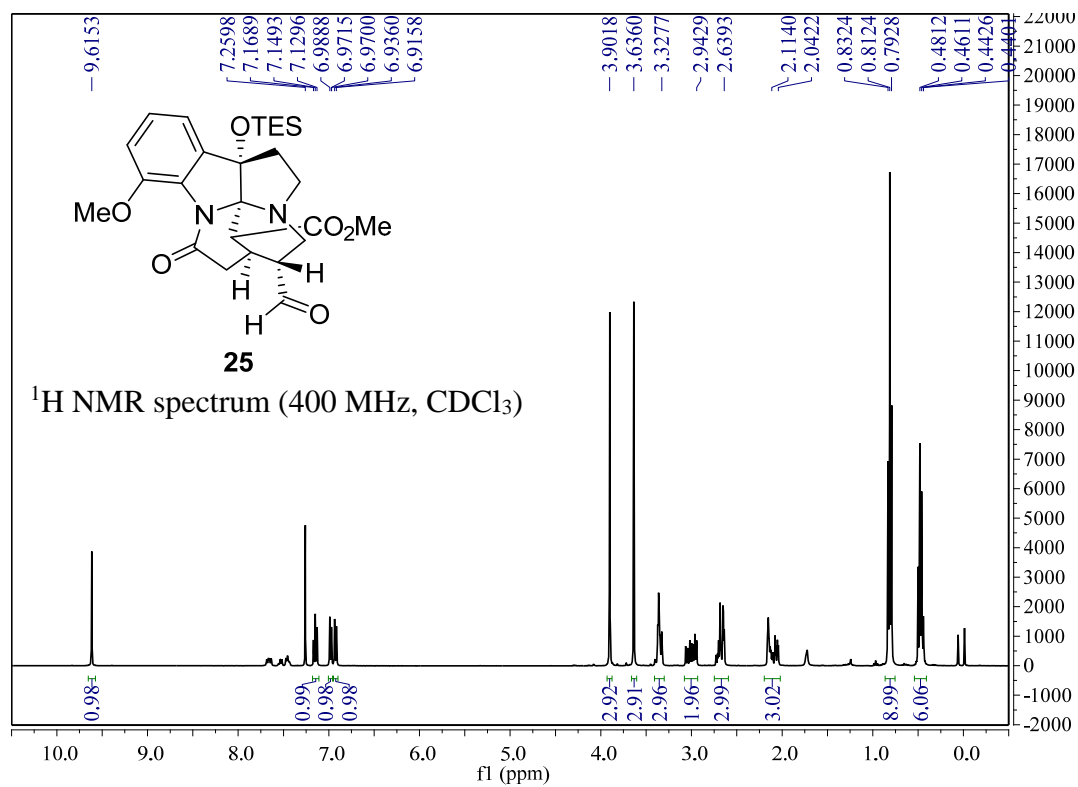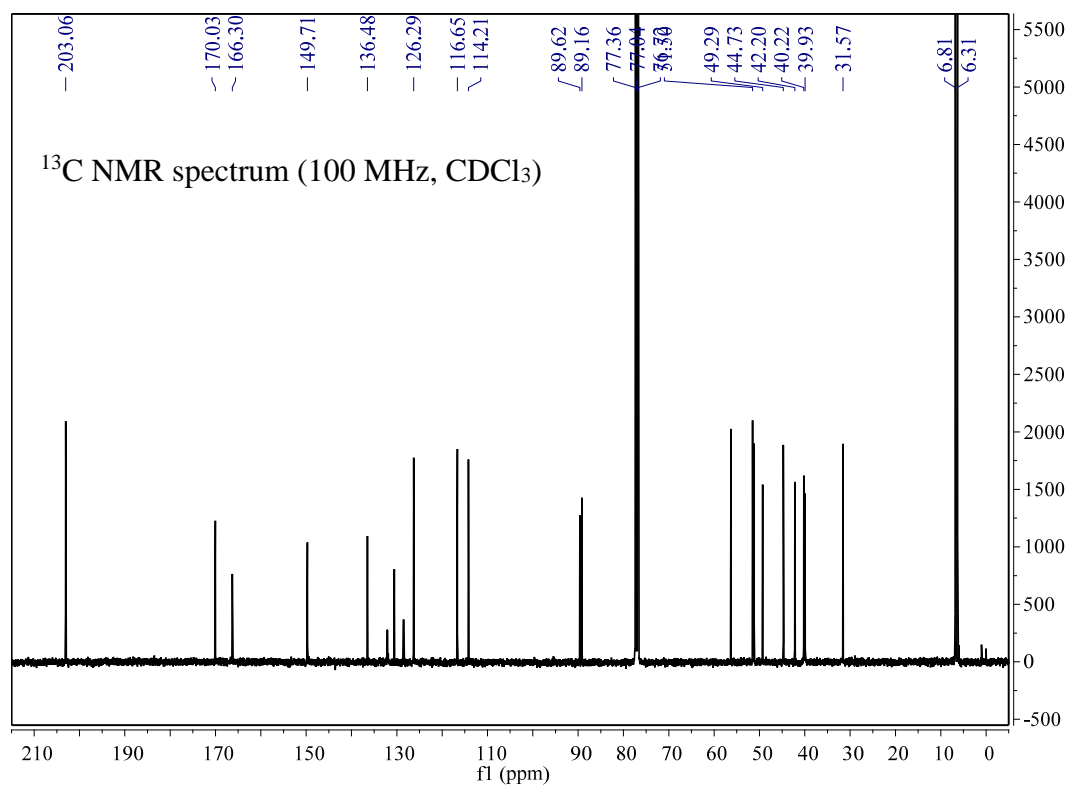

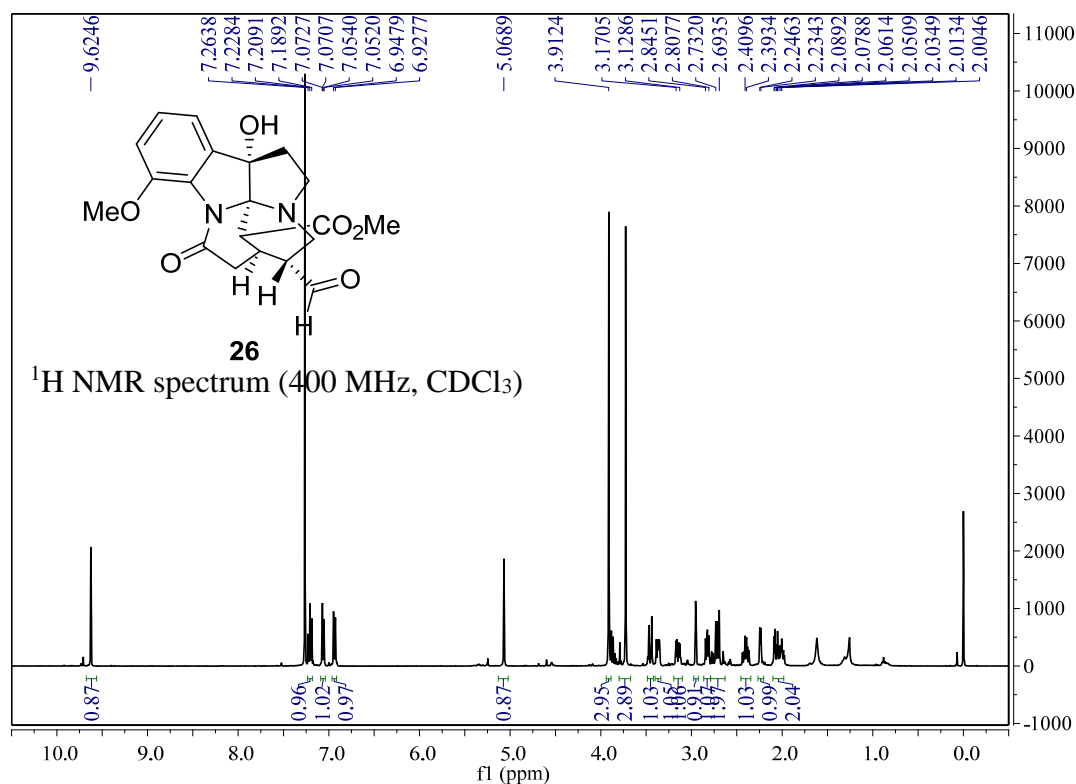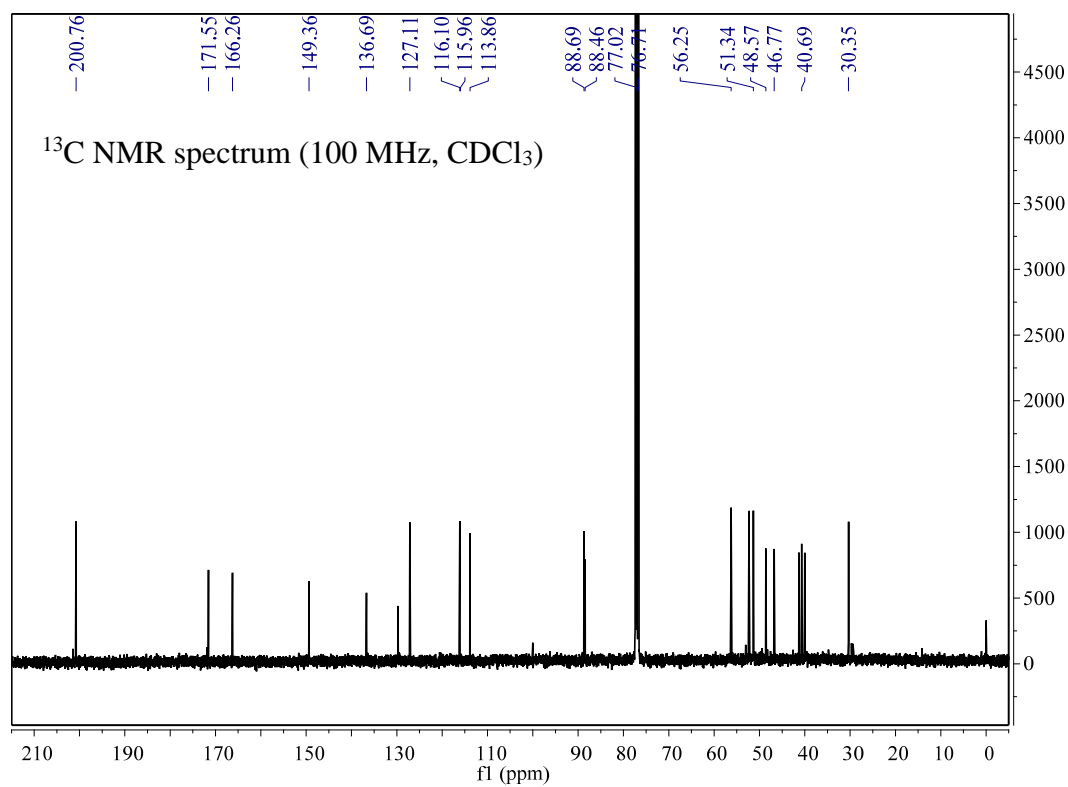



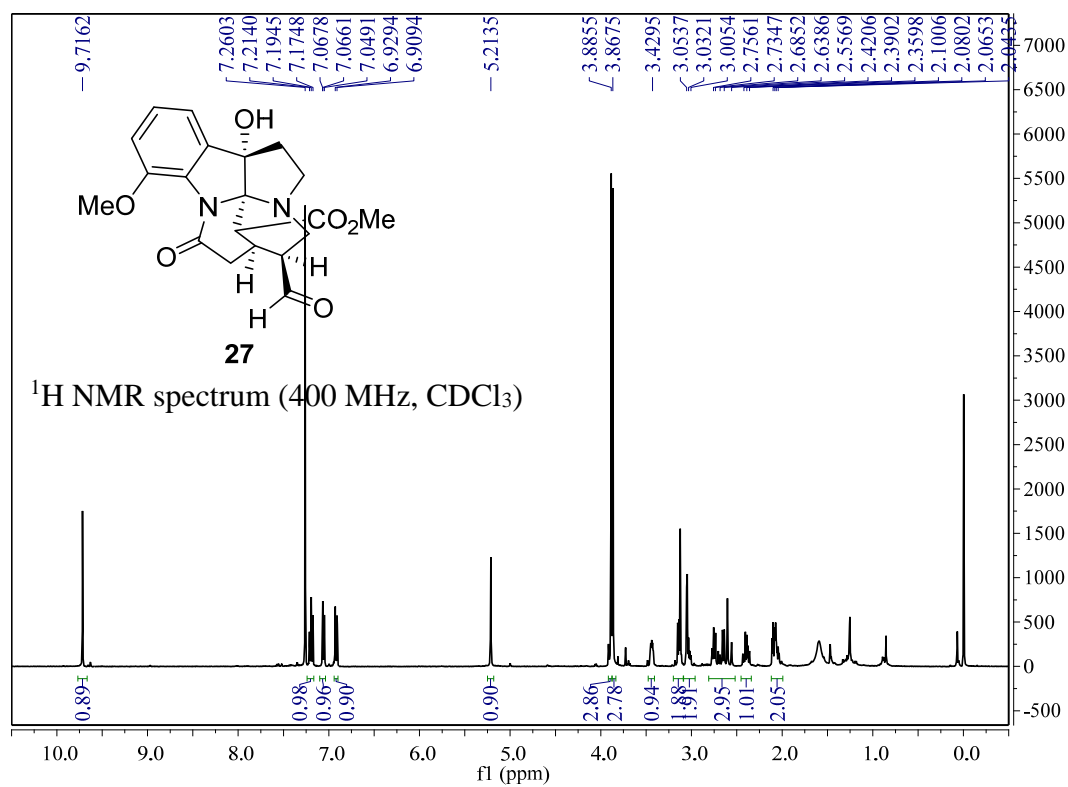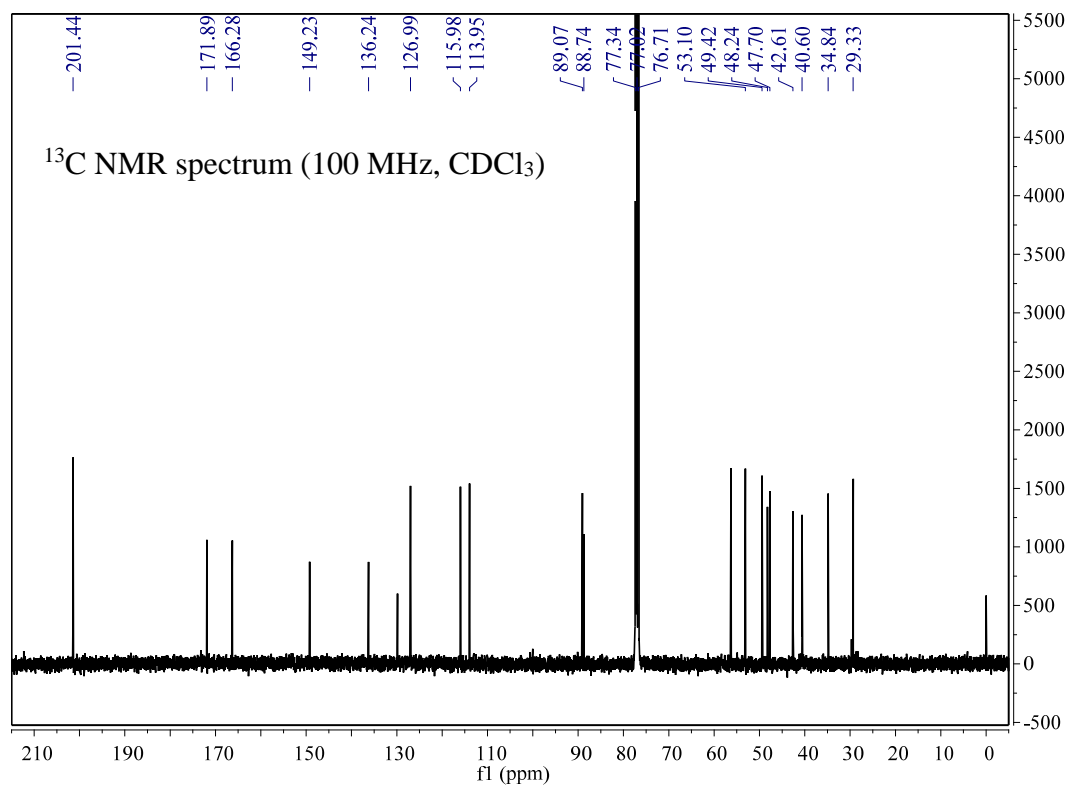

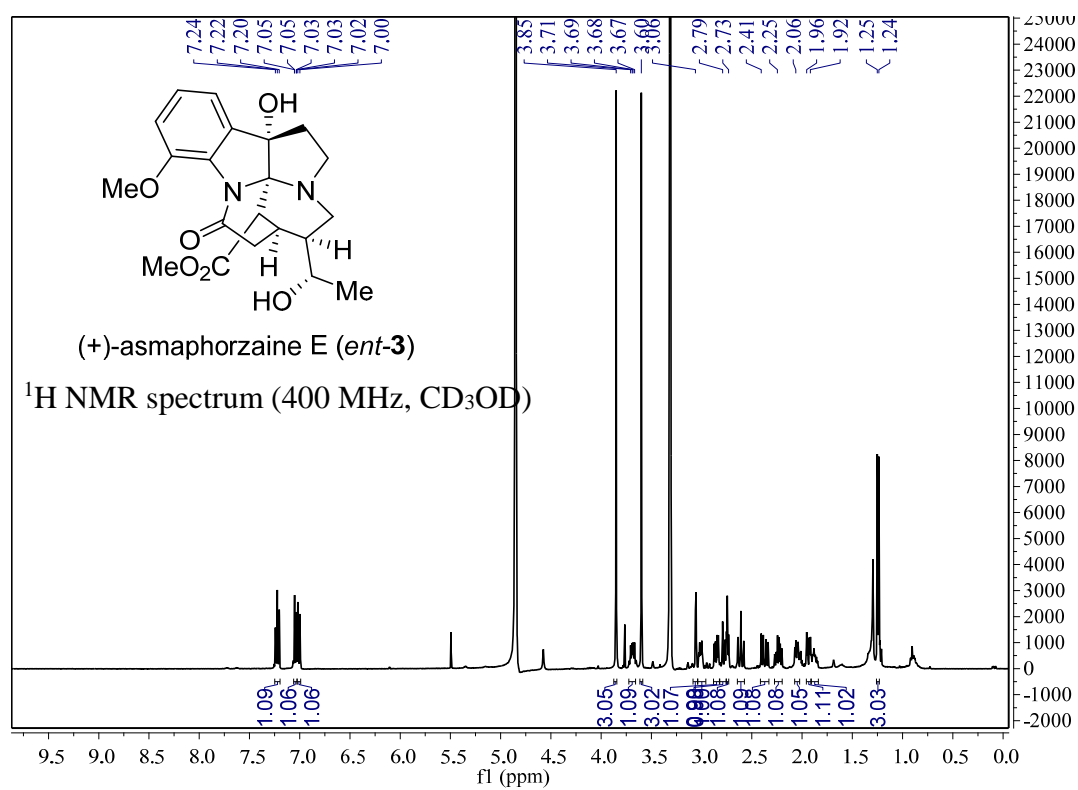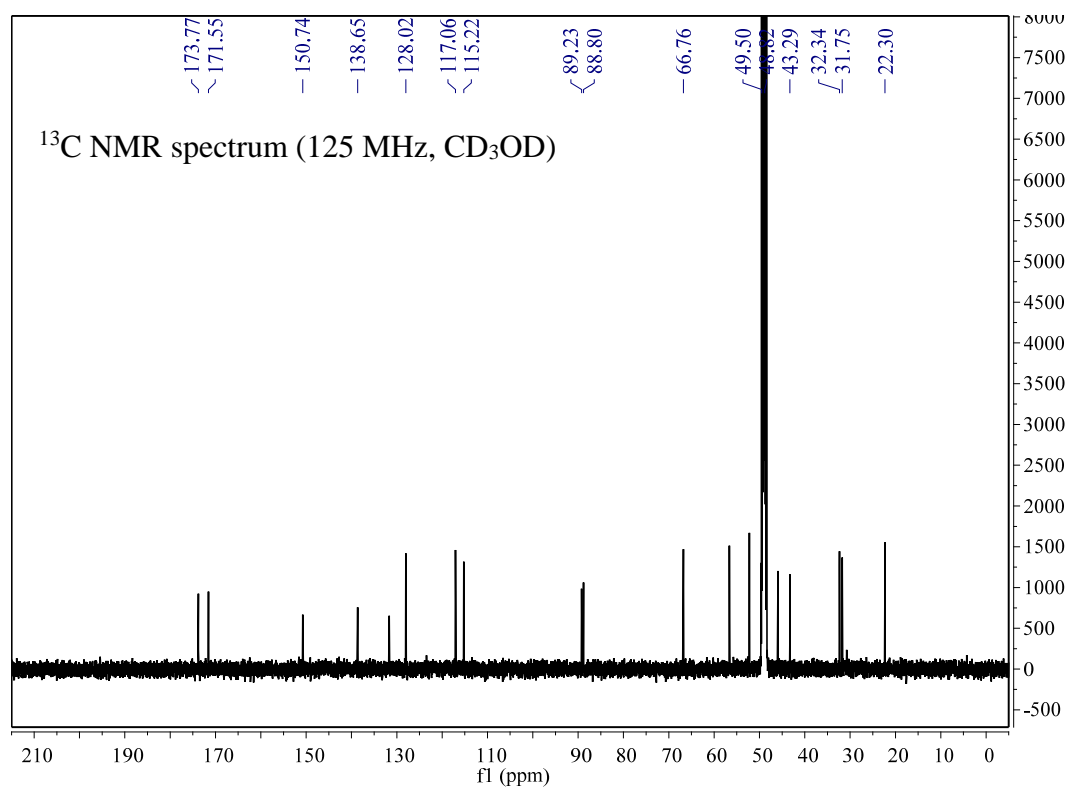

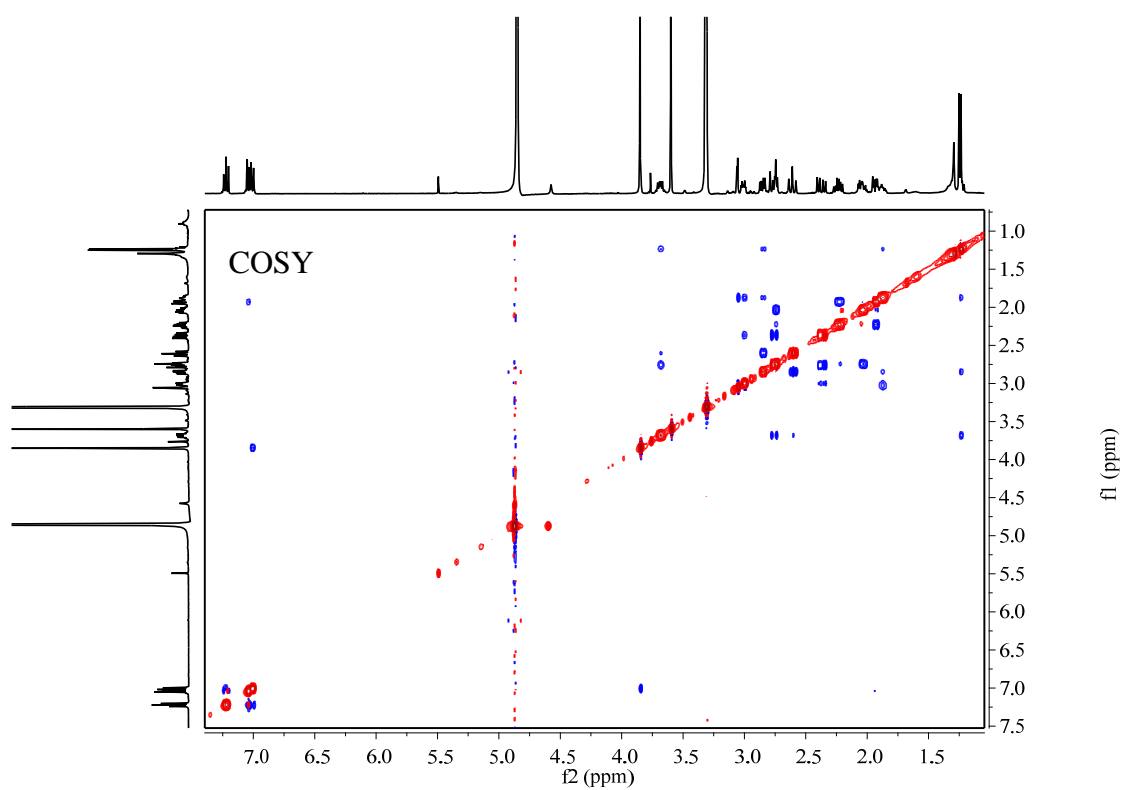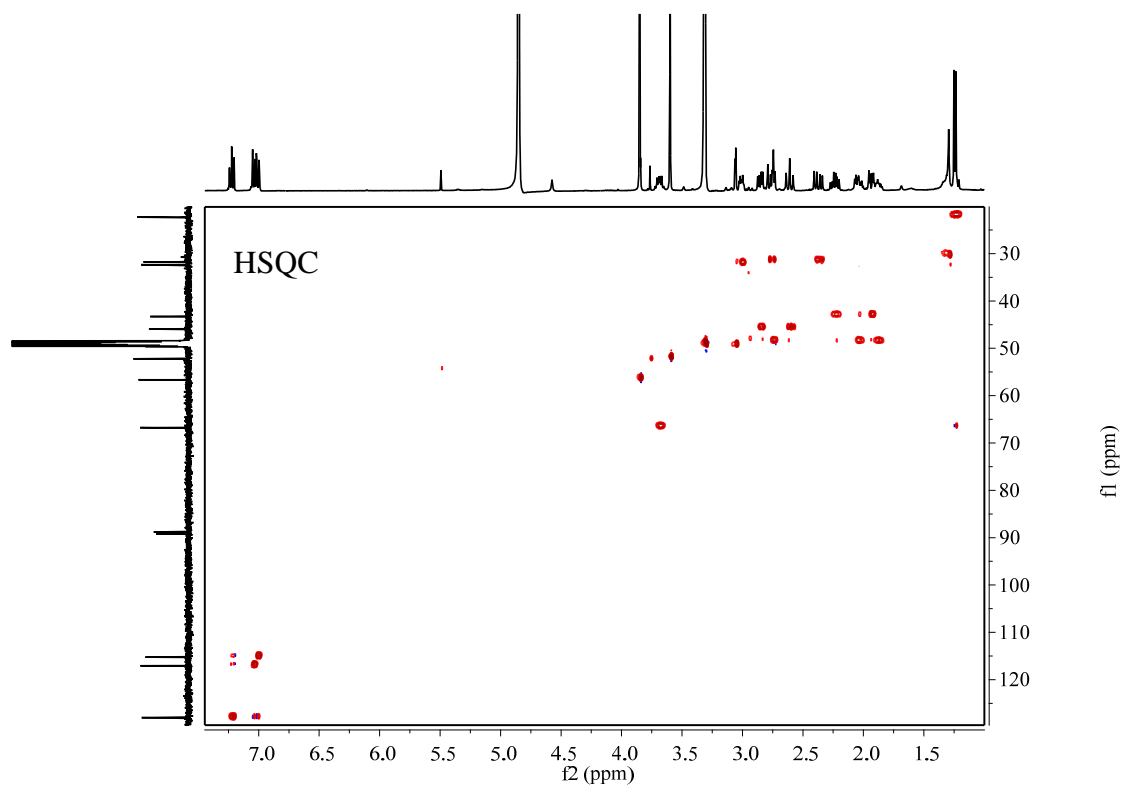

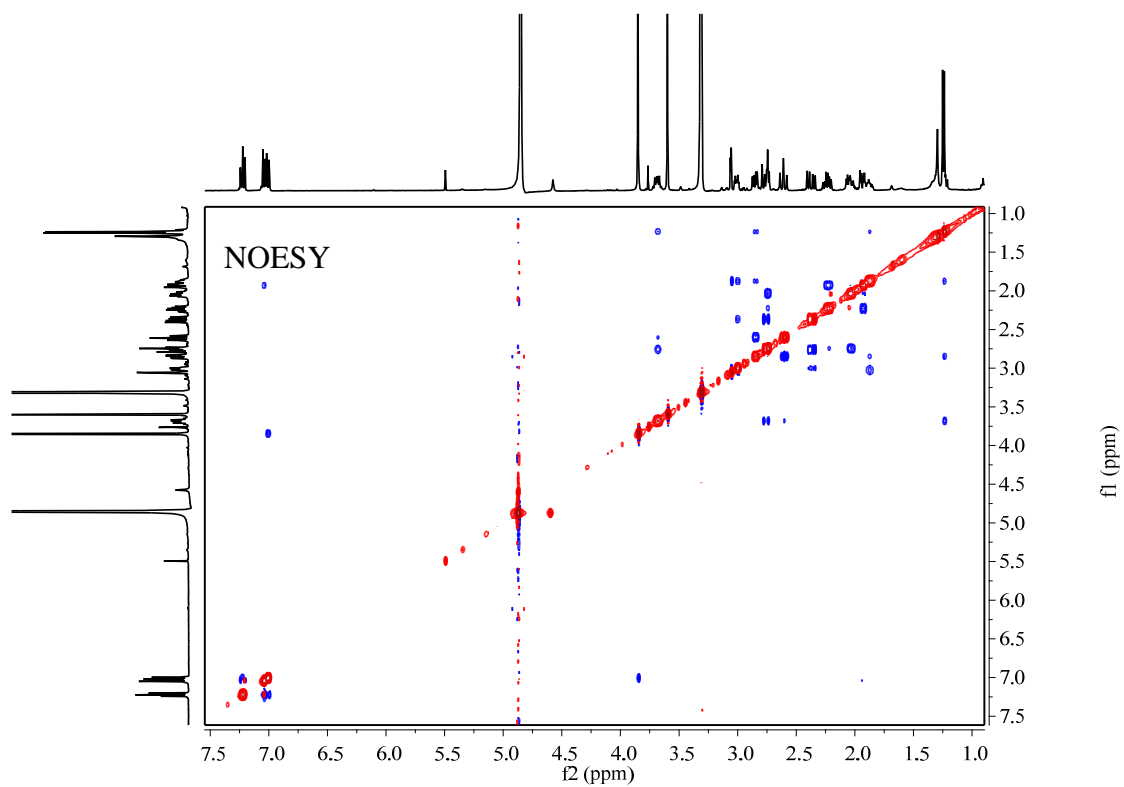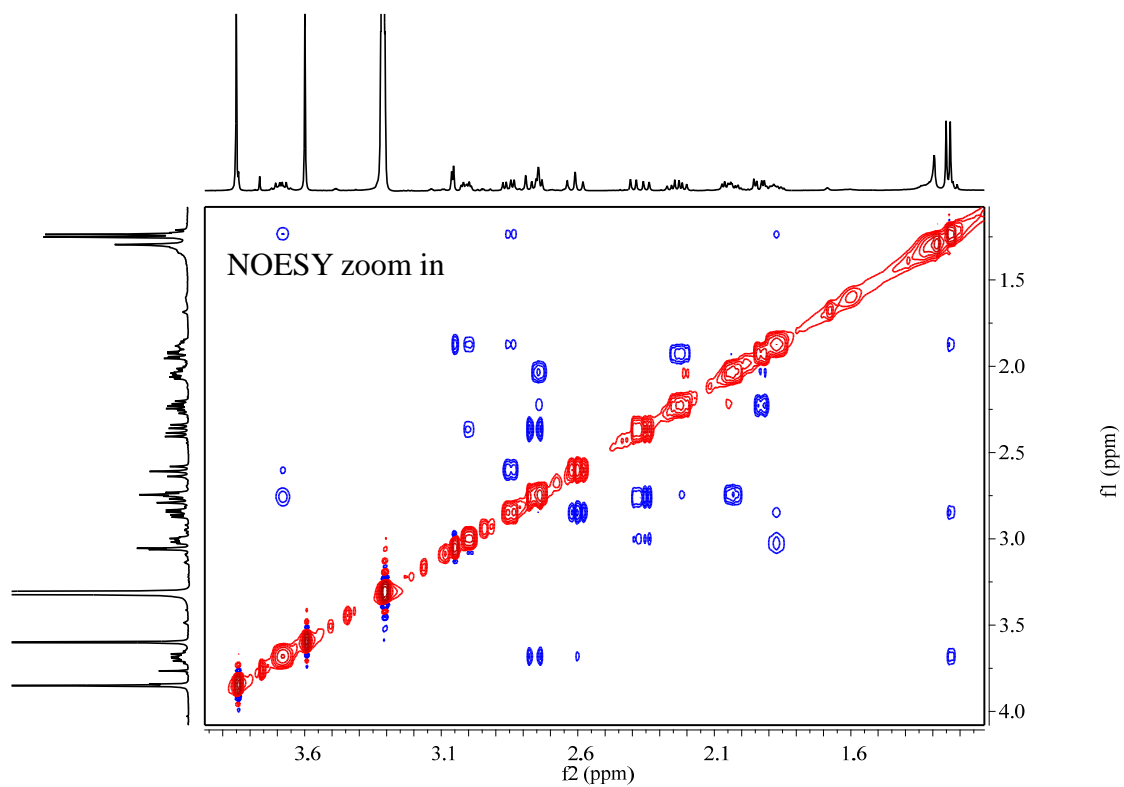

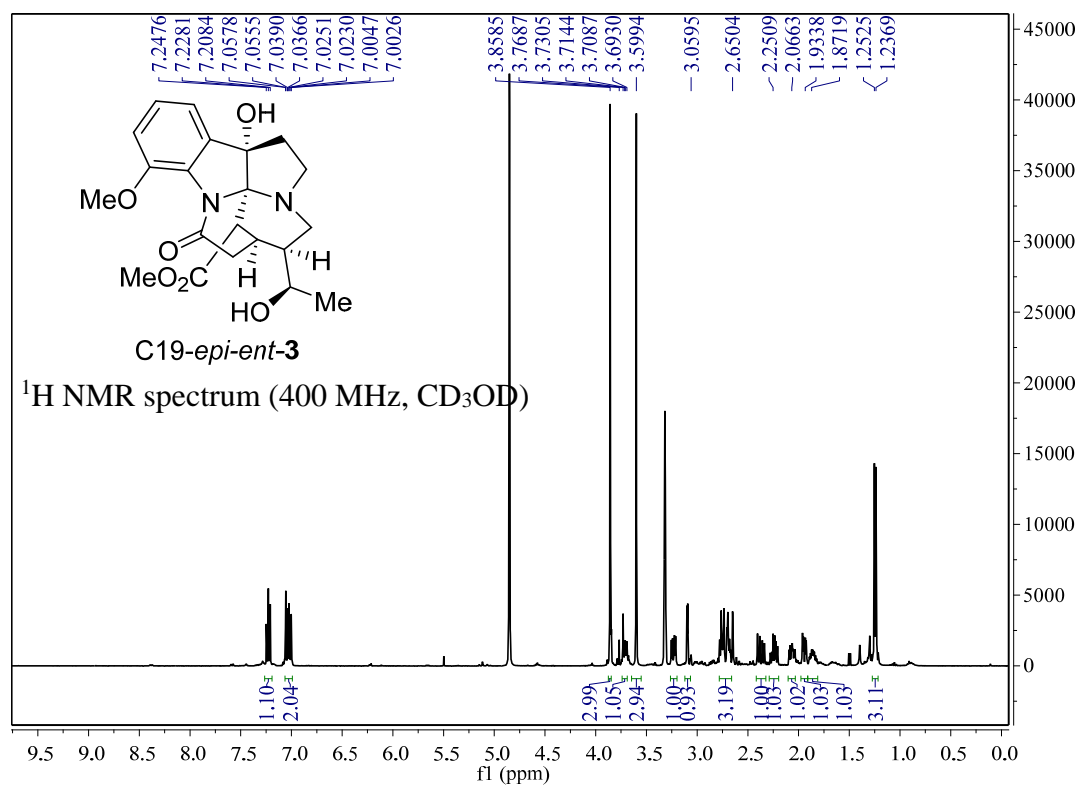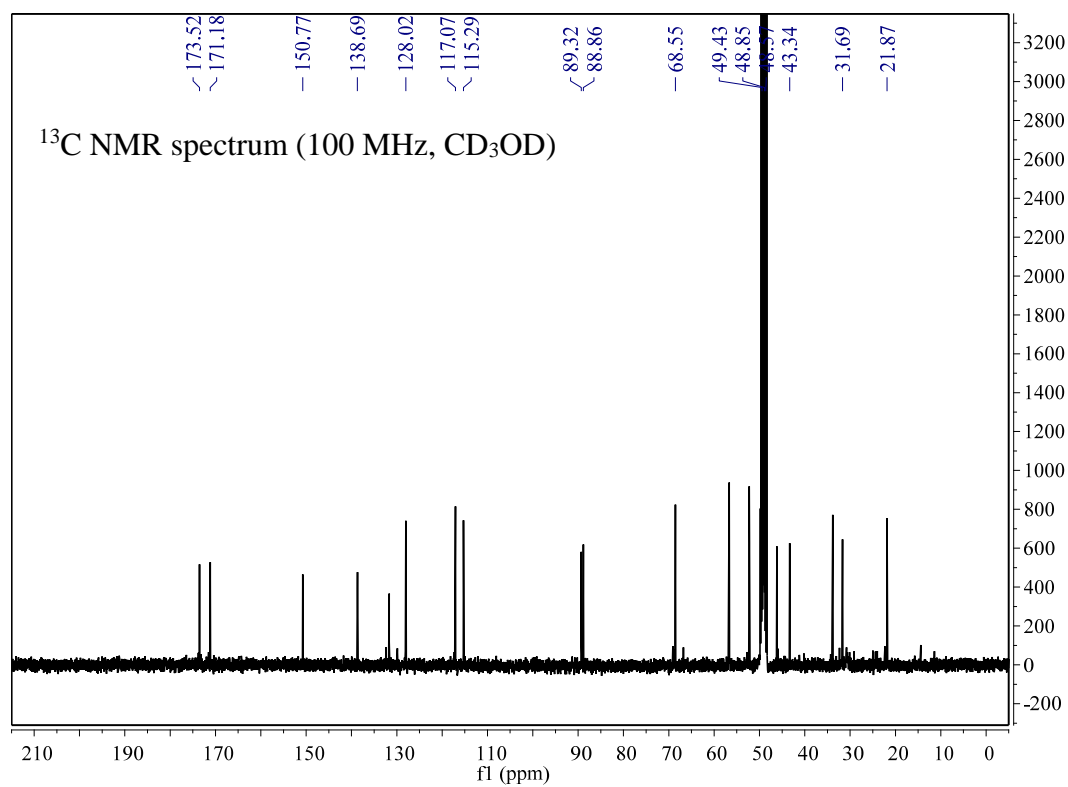

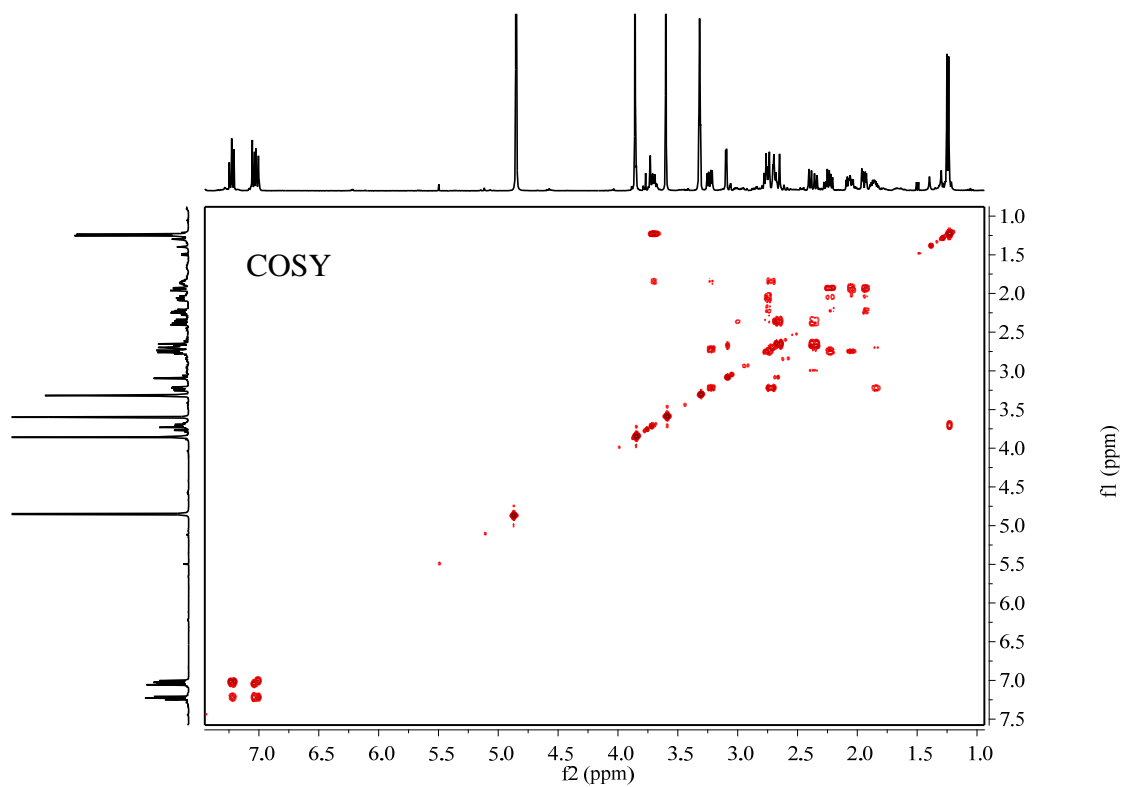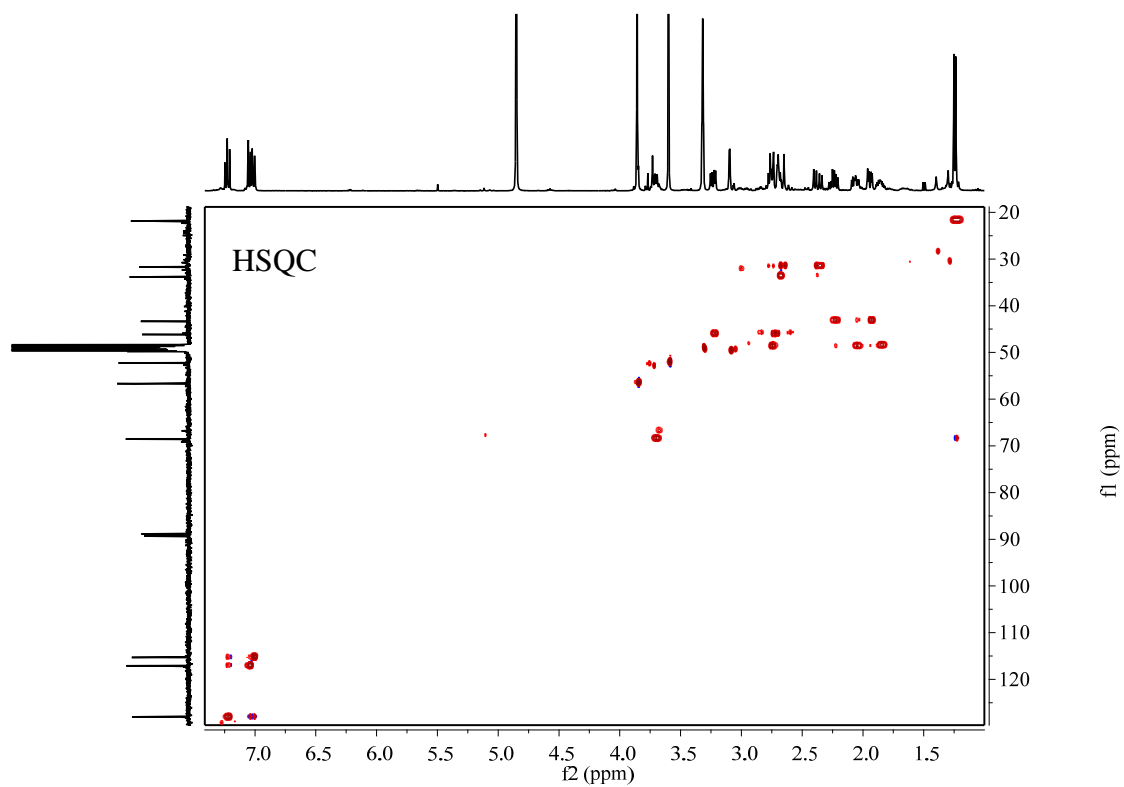

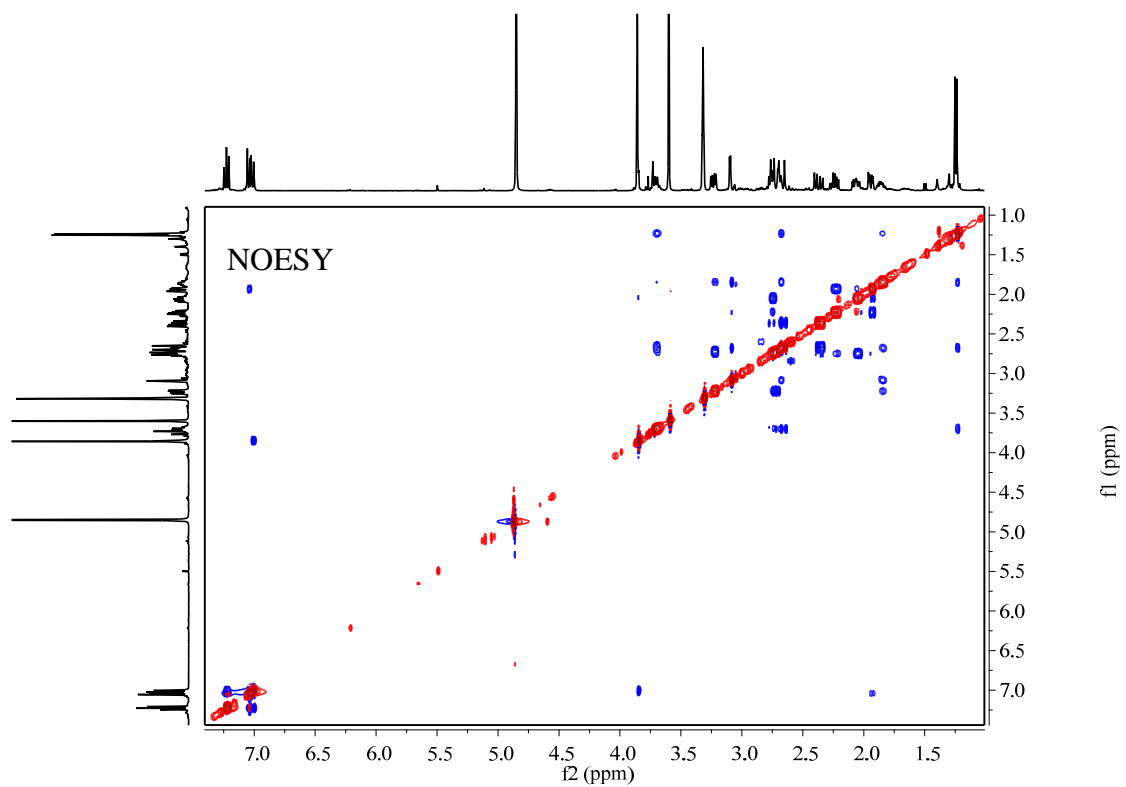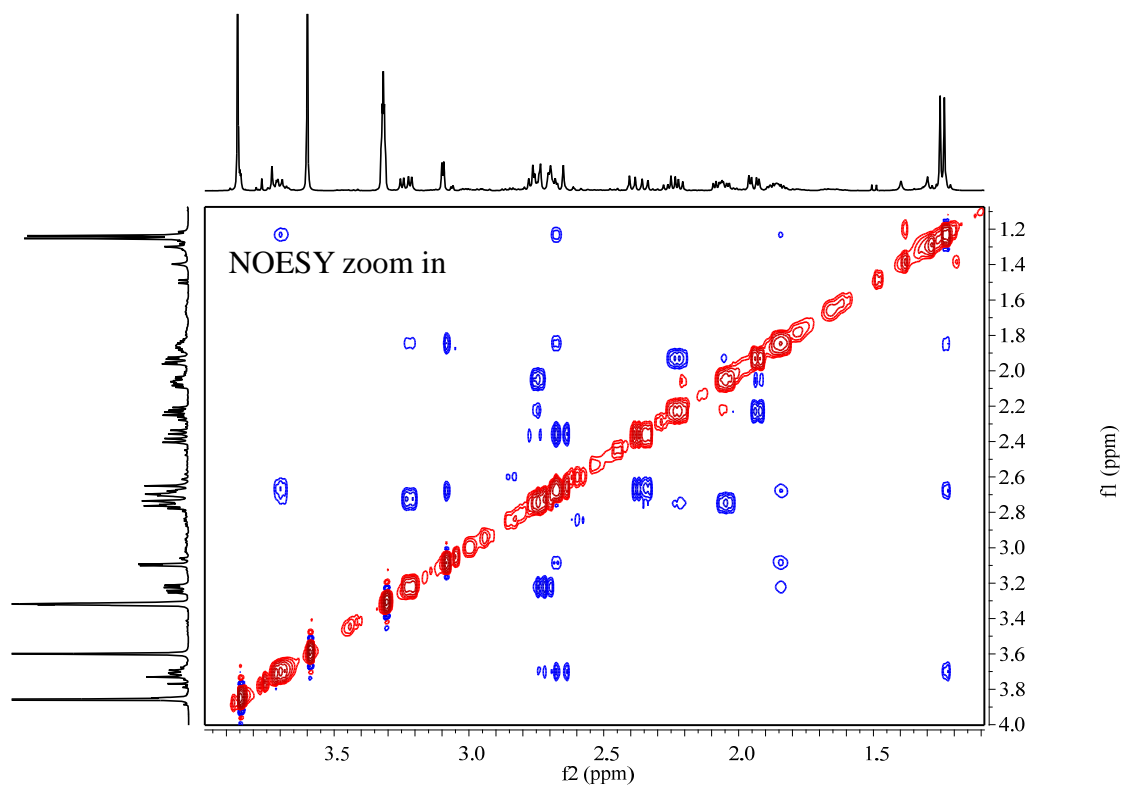

Supplement: c6cc00930a1.pdf [file c6cc00930a1.pdf]
